# Supplementary material for: Histone Variant H2A.B.3 Orchestrates a New Nuclear Pathway for Histone mRNA Decay
Source: Research Square preprint supplement (doi:10.21203/rs.3.rs-8304477/v1), 2025-12-10
Supplement: Supplementary file 1 [file 47afe80aa5df0c8a7f4f0fbf.xlsx]

## Sheet: 1. Genes_RDH_snRNA_HVar
RD histones (DEG)	snRNAs (Control)	Histone Variants (Control)
H1f1	Gm24265	H1f0
H1f2	Gm24407	H1f10
H1f3	Gm22513	H1f7
H1f4	Gm24305	H1f9
H1f6	Gm22317	H2ab1
H2bc1	Gm25679	H2ab2
H2bc3	Gm26444	H2ab3
H2bc4	Gm25189	H2aj
H2bc6	Gm22614	H2al1a
H2bc8	Rnu1b1	H2al1b
H2bc11	Gm25890	H2al1c
H2bc12	Gm22042	H2al1d
H2bc13	Rnu2-10	H2al1e
H2bc14	Gm23971	H2al1f
H2bc15	Gm23444	H2al1g
H2bc22	Gm25360	H2al1h
H2bc23	Gm24950	H2al1i
H2bc24	Gm23143	H2al1j
H2bc27	Gm22068	H2al1k
H3c1	Gm23238	H2al1m
H3c2	Gm23680	H2al1n
H3c3	Gm25682	H2al1o
H3c6	Gm25818	H2al2a
H3c7	Gm25587	H2al2b
H3c8	Gm22973	H2al2c
H3c10	Gm23849	H2al3
H4c1	Gm26108	H2ap
H4c3		H2ax
H4c4		H2bl1
H4c6		H2bw2
H4c8		H3f3a
H4c11		H4c16
H4c12
H4c16
H4c17
H4c18

## Sheet: 2. GLMM_RS
tissue_type	contrast	gene_symbol	transcript_class	estimate	SE	asymp.LCL	asymp.UCL	z.ratio	p.value.two.sided	expected_direction	p.value.one.sided	2023-01-31_wt_RS_rep1_lib1_full	2023-01-31_wt_RS_rep1_lib1_trunc	2023-03-01_wt_RS_rep2_lib1_full	2023-03-01_wt_RS_rep2_lib1_trunc	2023-05-26_wt_RS_rep4_lib1_full	2023-05-26_wt_RS_rep4_lib1_trunc	2023-05-31_wt_RS_rep3_lib1_full	2023-05-31_wt_RS_rep3_lib1_trunc	2023-02-02_mut_RS_rep1_lib1_full	2023-02-02_mut_RS_rep1_lib1_trunc	2023-03-03_mut_RS_rep2_lib1_full	2023-03-03_mut_RS_rep2_lib1_trunc	2023-05-22_mut_RS_rep3_lib1_full	2023-05-22_mut_RS_rep3_lib1_trunc	2023-05-28_mut_RS_rep4_lib1_full	2023-05-28_mut_RS_rep4_lib1_trunc
RS	mut - wt	Gm23849	snRNA	0.360081	0.099364	0.165331	0.554831	3.62386	0.000290237	positive	0.000145119	186	577	248	816	462	1408	117	423	122	199	35	122	74	174	250	690
RS	mut - wt	H2bc3	Core histone	0.441039	0.130311	0.185635	0.696444	3.38452	0.000713039	positive	0.00035652	88	23	133	41	274	113	38	26	227	55	164	33	573	113	132	63
RS	mut - wt	H2bc15	Core histone	1.21539	0.371848	0.486584	1.9442	3.26852	0.00108112	positive	0.00054056	15	0	28	1	75	12	8	2	61	0	67	2	217	8	31	1
RS	mut - wt	H2bc24	Core histone	0.669768	0.206801	0.264446	1.07509	3.23871	0.00120072	positive	0.000600359	44	10	74	11	148	23	23	6	135	9	130	15	405	25	61	12
RS	mut - wt	H4c6	Core histone	0.772266	0.261695	0.259352	1.28518	2.95101	0.00316736	positive	0.00158368	20	8	36	7	74	15	7	2	54	2	46	5	206	18	36	11
RS	mut - wt	H3c2	Core histone	1.09565	0.394054	0.323323	1.86799	2.78047	0.00542803	positive	0.00271402	8	1	13	3	28	9	4	2	15	4	15	1	78	1	16	4
RS	mut - wt	H2bc23	Core histone	0.559417	0.215169	0.137693	0.981142	2.59989	0.00932531	positive	0.00466266	50	4	84	10	142	23	20	6	119	11	116	9	383	25	64	11
RS	mut - wt	H4c4	Core histone	0.604461	0.245685	0.122927	1.08599	2.46031	0.0138817	positive	0.00694087	40	3	69	4	79	23	10	4	100	4	97	4	216	25	51	10
RS	mut - wt	H2bc14	Core histone	0.502181	0.206989	0.0964896	0.907872	2.42612	0.0152611	positive	0.00763057	41	2	59	12	195	30	21	5	97	10	103	8	429	33	81	16
RS	mut - wt	H4c18	Core histone	0.348848	0.146071	0.0625532	0.635142	2.3882	0.0169311	positive	0.00846554	187	13	305	18	468	66	99	13	433	20	429	23	1273	71	250	60
RS	mut - wt	H4c17	Core histone	0.406253	0.170198	0.0726717	0.739834	2.38695	0.0169889	positive	0.00849445	64	8	109	9	201	45	45	15	162	18	144	14	518	49	154	43
RS	mut - wt	H2bc13	Core histone	0.815045	0.381907	0.0665204	1.56357	2.13414	0.032831	positive	0.0164155	12	2	18	1	40	7	2	2	29	1	25	3	104	7	22	2
RS	mut - wt	H2bc6	Core histone	0.523719	0.245693	0.0421692	1.00527	2.1316	0.0330399	positive	0.01652	21	3	42	6	41	21	5	7	53	6	52	9	112	25	26	5
RS	mut - wt	H4c1	Core histone	0.342022	0.173185	0.00258587	0.681458	1.9749	0.04828	positive	0.02414	25	22	32	47	37	60	5	12	49	42	44	33	136	113	10	42
RS	mut - wt	H3c7	Core histone	0.676066	0.357684	-0.0249813	1.37711	1.89012	0.0587416	positive	0.0293708	23	0	32	3	37	7	11	3	53	3	54	4	111	5	29	4
RS	mut - wt	H2bc11	Core histone	0.405573	0.229667	-0.0445664	0.855712	1.76592	0.0774099	positive	0.038705	33	5	43	8	159	20	22	4	85	7	78	11	312	26	65	9
RS	mut - wt	H4c16	Core histone	0.334876	0.191744	-0.0409344	0.710687	1.74648	0.0807277	positive	0.0403639	31	17	33	21	56	47	7	12	41	14	25	13	102	40	32	43
RS	mut - wt	H3c10	Core histone	0.65924	0.385578	-0.0964795	1.41496	1.70974	0.0873132	positive	0.0436566	28	2	40	1	93	7	9	2	45	0	53	0	182	8	22	2
RS	mut - wt	Gm23971	snRNA	0.164068	0.099702	-0.031344	0.359481	1.64559	0.0998487	positive	0.0499243	229	568	291	751	492	1395	167	421	96	204	25	103	69	148	258	676
RS	mut - wt	H2bc27	Core histone	0.264681	0.161055	-0.0509814	0.580342	1.64342	0.100297	positive	0.0501483	35	14	49	17	154	66	25	10	103	22	90	27	288	82	58	33
RS	mut - wt	H4c12	Core histone	0.350724	0.221555	-0.0835152	0.784964	1.58301	0.113418	positive	0.0567092	93	2	112	4	253	24	63	12	142	8	117	5	489	22	161	17
RS	mut - wt	H3c3	Core histone	0.649042	0.430089	-0.193918	1.492	1.50909	0.131277	positive	0.0656384	12	1	14	0	45	7	6	0	32	1	21	1	73	2	18	4
RS	mut - wt	Gm25360	snRNA	0.213087	0.144511	-0.0701501	0.496324	1.47453	0.140338	positive	0.070169	60	177	105	234	124	282	45	116	37	58	14	38	19	30	60	154
RS	mut - wt	Gm24950	snRNA	0.136337	0.0992085	-0.058108	0.330782	1.37425	0.169365	positive	0.0846824	231	533	279	810	526	1415	150	414	83	207	34	130	73	174	267	675
RS	mut - wt	H2al1b	Histone variant	0.674779	0.552801	-0.40869	1.75825	1.22066	0.222216	positive	0.111108	26	5	15	1	4	0	0	0	54	3	33	1	2	0	0	0
RS	mut - wt	H3c1	Core histone	0.267202	0.234385	-0.192184	0.726587	1.14001	0.254281	positive	0.12714	33	3	45	3	155	20	8	5	70	7	85	10	300	27	34	5
RS	mut - wt	H2bc1	Core histone	0.122751	0.110659	-0.0941355	0.339638	1.10928	0.267309	positive	0.133655	838	51	1118	64	1520	117	608	59	1464	89	882	48	2159	135	1020	75
RS	mut - wt	H2bc8	Core histone	0.335534	0.305181	-0.262609	0.933677	1.09946	0.271567	positive	0.135783	12	2	15	1	50	15	5	2	35	8	30	2	96	12	16	9
RS	mut - wt	H1f3	Core histone	0.367095	0.363324	-0.345006	1.0792	1.01038	0.312313	positive	0.156156	13	2	9	3	43	6	9	1	31	4	25	4	63	9	22	1
RS	mut - wt	H1f4	Core histone	0.340201	0.347874	-0.341619	1.02202	0.977945	0.328102	positive	0.164051	10	2	9	5	27	4	7	6	21	3	22	8	41	8	11	3
RS	mut - wt	Rnu2-10	snRNA	0.0903561	0.099699	-0.10505	0.285763	0.906289	0.364783	positive	0.182391	215	538	301	814	543	1440	148	387	87	234	48	106	62	184	240	637
RS	mut - wt	H2bc4	Core histone	0.201243	0.325213	-0.436163	0.838648	0.618802	0.536047	positive	0.268023	0	17	3	22	4	87	5	7	4	46	16	40	13	135	1	28
RS	mut - wt	H2al1e	Histone variant	0.21709	0.431163	-0.627973	1.06215	0.503499	0.614614	positive	0.307307	39	1	36	4	6	0	2	0	90	9	56	1	3	0	0	0
RS	mut - wt	H2al1n	Histone variant	0.208935	0.439715	-0.652891	1.07076	0.47516	0.634673	positive	0.317337	39	1	40	5	1	1	0	0	82	7	46	5	2	0	1	0
RS	mut - wt	H2al1m	Histone variant	0.185396	0.411803	-0.621724	0.992515	0.450204	0.652563	positive	0.326282	53	4	50	5	6	0	1	0	99	10	50	0	3	0	0	0
RS	mut - wt	Gm24407	snRNA	0.0500449	0.119516	-0.184203	0.284293	0.418729	0.675414	positive	0.337707	569	66	1126	219	713	87	239	31	356	56	297	32	312	57	350	49
RS	mut - wt	H2bc22	Core histone	0.077275	0.200665	-0.316021	0.470571	0.385095	0.700167	positive	0.350083	30	12	51	11	64	28	20	9	71	14	49	10	91	44	24	10
RS	mut - wt	H2al2c	Histone variant	0.43847	1.31623	-2.1413	3.01824	0.333125	0.73904	positive	0.36952	2	1	3	0	1	0	0	0	0	0	3	0	0	0	0	0
RS	mut - wt	H2al1a	Histone variant	0.119317	0.436731	-0.73666	0.975293	0.273204	0.784696	positive	0.392348	45	1	42	2	6	2	0	0	87	9	46	0	7	0	1	0
RS	mut - wt	H2al3	Histone variant	0.0958085	0.42647	-0.740057	0.931674	0.224655	0.822248	positive	0.411124	45	5	52	2	11	0	0	0	84	3	50	5	5	0	0	0
RS	mut - wt	Rnu1b1	snRNA	0.00608079	0.100848	-0.191578	0.20374	0.0602965	0.951919	positive	0.47596	744	228	1086	341	846	213	350	117	258	89	224	101	350	105	522	126
RS	mut - wt	Gm22317	snRNA	-0.000375406	0.0842735	-0.165548	0.164798	-0.00445461	0.996446	positive	0.501777	5667	576	10921	910	4948	509	2555	266	2946	289	3128	228	2843	234	2587	345
RS	mut - wt	H1f9	Histone variant	-0.00474908	0.115698	-0.231512	0.222014	-0.0410474	0.967258	positive	0.516371	633	86	703	136	137	28	26	4	1245	208	877	127	110	19	8	3
RS	mut - wt	H2al1d	Histone variant	-0.0912233	1.63486	-3.29549	3.11304	-0.0557989	0.955502	positive	0.522249	2	0	0	0	0	0	0	0	2	0	0	0	0	0	0	0
RS	mut - wt	Gm22155	snRNA	-0.0268256	0.466397	-0.940946	0.887295	-0.0575167	0.954134	positive	0.522933	49	2	134	3	55	2	43	2	20	0	25	2	50	2	60	0
RS	mut - wt	H2al1g	Histone variant	-0.0254102	0.341403	-0.694547	0.643727	-0.0744287	0.940669	positive	0.529665	101	6	75	7	19	0	0	0	178	14	99	4	4	0	0	0
RS	mut - wt	H2al2b	Histone variant	-0.106406	1.33571	-2.72434	2.51153	-0.0796627	0.936506	positive	0.531747	2	0	1	0	1	0	0	0	6	0	1	1	0	0	0	0
RS	mut - wt	Gm25679	snRNA	-0.00752801	0.0838682	-0.171907	0.156851	-0.0897601	0.928478	positive	0.535761	5621	587	10869	994	4857	514	2683	280	2850	287	3167	234	2843	264	2570	370
RS	mut - wt	Gm22042	snRNA	-0.0132172	0.105245	-0.219493	0.193059	-0.125585	0.900061	positive	0.54997	421	221	599	307	468	194	197	114	142	82	146	76	221	117	280	140
RS	mut - wt	Gm24305	snRNA	-0.0105805	0.0841096	-0.175432	0.154271	-0.125794	0.899895	positive	0.550053	5778	548	11027	959	4968	531	2583	285	2888	252	3074	244	2830	255	2595	365
RS	mut - wt	Gm26244	snRNA	-0.0314315	0.0908822	-0.209557	0.146694	-0.345848	0.729457	positive	0.635272	2239	365	3691	625	1936	274	941	157	1046	159	907	126	819	139	984	217
RS	mut - wt	H1f6	Core histone	-0.0582662	0.154441	-0.360966	0.244433	-0.37727	0.705973	positive	0.647014	130	20	200	35	127	39	26	3	288	40	263	66	252	63	44	11
RS	mut - wt	H2aj	Histone variant	-0.3686	0.736784	-1.81267	1.07547	-0.500282	0.616877	positive	0.691562	2	2	2	1	2	1	2	0	3	3	0	3	2	2	2	1
RS	mut - wt	H1f0	Histone variant	-0.244548	0.450991	-1.12847	0.639378	-0.542247	0.587649	positive	0.706176	2	2	0	3	5	28	11	14	1	9	1	2	3	5	1	9
RS	mut - wt	Gm23444	snRNA	-0.0731475	0.122233	-0.31272	0.166425	-0.598426	0.549556	positive	0.725222	141	194	163	198	291	416	125	156	31	60	11	27	34	54	157	242
RS	mut - wt	H2ab1	Histone variant	-0.59349	0.973886	-2.50227	1.31529	-0.609404	0.542257	positive	0.728872	2	0	2	0	7	0	0	0	3	1	3	0	0	0	2	0
RS	mut - wt	Gm24265	snRNA	-0.0735721	0.114276	-0.297549	0.150405	-0.643811	0.519698	positive	0.740151	905	71	1862	207	939	98	340	35	608	78	378	29	481	73	577	50
RS	mut - wt	Gm22513	snRNA	-0.0579147	0.0895515	-0.233432	0.117603	-0.646719	0.517814	positive	0.741093	1738	384	3296	584	1956	320	963	163	871	144	941	152	988	185	1000	274
RS	mut - wt	Gm23287	snRNA	-0.52551	0.780101	-2.05448	1.00346	-0.673644	0.500538	positive	0.749731	9	1	8	0	16	2	4	0	2	0	2	0	1	0	3	0
RS	mut - wt	H3c6	Core histone	-0.346859	0.511963	-1.35029	0.656571	-0.677507	0.498085	positive	0.750958	11	0	12	0	20	1	2	2	14	0	10	1	30	4	6	4
RS	mut - wt	Gm26444	snRNA	-0.0575985	0.0839434	-0.222125	0.106928	-0.686158	0.492613	positive	0.753693	5672	575	11020	996	5016	499	2780	244	2821	284	3134	235	2784	276	2606	360
RS	mut - wt	Gm25890	snRNA	-0.0694784	0.0975655	-0.260703	0.121746	-0.712121	0.47639	positive	0.761805	1549	223	2581	318	1705	210	787	92	632	94	793	88	837	119	889	141
RS	mut - wt	H3c8	Core histone	-0.290419	0.404991	-1.08419	0.503348	-0.7171	0.473312	positive	0.763344	9	2	9	0	26	6	2	0	5	2	12	1	46	12	9	5
RS	mut - wt	H2bc12	Core histone	-0.146674	0.203052	-0.544648	0.2513	-0.722347	0.470081	positive	0.764959	55	14	42	11	131	13	34	4	101	27	108	29	270	38	90	16
RS	mut - wt	Gm25189	snRNA	-0.105338	0.144224	-0.388012	0.177335	-0.73038	0.465158	positive	0.767421	291	79	323	94	331	66	112	37	113	26	74	27	81	22	131	44
RS	mut - wt	H1f1	Core histone	-0.0959961	0.124525	-0.34006	0.148068	-0.7709	0.440766	positive	0.779617	197	25	264	23	935	113	149	9	565	48	455	75	1360	167	278	26
RS	mut - wt	H4c11	Core histone	-0.511742	0.638409	-1.763	0.739517	-0.801589	0.422791	positive	0.788605	0	137	0	183	0	415	0	107	0	258	0	195	1	668	0	262
RS	mut - wt	H4c8	Core histone	-0.160901	0.180346	-0.514372	0.19257	-0.892182	0.372295	positive	0.813852	61	14	71	13	83	36	54	27	69	13	35	9	98	39	70	49
RS	mut - wt	H2bl1	Histone variant	-0.27646	0.295793	-0.856203	0.303283	-0.934641	0.349974	positive	0.825013	127	5	83	9	10	1	2	0	187	22	96	7	10	0	1	0
RS	mut - wt	H2al2a	Histone variant	-0.195825	0.195472	-0.578943	0.187294	-1.0018	0.316439	positive	0.841781	222	26	213	21	9	1	1	0	459	55	247	32	4	4	0	0
RS	mut - wt	Gm25134	snRNA	-0.907014	0.831564	-2.53685	0.722821	-1.09073	0.275391	positive	0.862305	1	0	11	0	11	0	4	0	2	0	2	0	3	0	4	0
RS	mut - wt	Gm23879	snRNA	-1.96982	1.63483	-5.17402	1.23438	-1.20491	0.228238	positive	0.885881	0	0	0	0	2	0	0	0	0	0	0	0	0	0	0	2
RS	mut - wt	H2ap	Histone variant	-0.300867	0.236351	-0.764106	0.162372	-1.27297	0.203029	positive	0.898486	176	18	185	11	7	1	1	0	348	39	187	19	1	0	0	0
RS	mut - wt	Gm22614	snRNA	-0.127059	0.0972575	-0.317681	0.0635617	-1.30642	0.191408	positive	0.904296	1450	227	2587	278	1732	224	757	90	720	76	763	101	837	113	843	172
RS	mut - wt	Gm25514	snRNA	-1.00905	0.706646	-2.39405	0.375953	-1.42794	0.153309	positive	0.923345	12	0	22	0	28	0	13	0	2	0	5	0	7	0	15	1
RS	mut - wt	H4c3	Core histone	-0.826689	0.524166	-1.85404	0.200658	-1.57715	0.114761	positive	0.942619	1	251	1	390	0	449	0	118	1	470	0	418	2	1133	0	344
RS	mut - wt	Gm25099	snRNA	-1.05378	0.664432	-2.35605	0.248478	-1.58599	0.112741	positive	0.94363	48	1	8	0	37	0	16	0	7	0	9	0	5	0	13	1
RS	mut - wt	H1f10	Histone variant	-0.407471	0.213173	-0.825282	0.0103391	-1.91146	0.0559451	positive	0.972027	12	16	10	12	47	44	39	21	28	32	16	22	15	27	11	14
RS	mut - wt	Gm25313	snRNA	-1.16088	0.573658	-2.28523	-0.0365288	-2.02364	0.0430071	positive	0.978496	42	2	5	0	33	2	27	3	3	1	4	1	0	1	8	1
RS	mut - wt	H1f2	Core histone	-0.996	0.439448	-1.8573	-0.134699	-2.26648	0.0234219	positive	0.988289	0	71	0	75	2	169	4	34	2	148	1	143	0	379	2	96
RS	mut - wt	H2al1k	Histone variant	-1.38811	0.588562	-2.54167	-0.23455	-2.35848	0.0183501	positive	0.990825	42	1	37	0	3	0	0	0	49	10	32	2	1	0	0	0
RS	mut - wt	H3f3a	Histone variant	-0.503856	0.16105	-0.819509	-0.188204	-3.12857	0.00175661	positive	0.999122	84	30	70	19	157	41	147	21	154	55	96	36	51	18	39	16
RS	mut - wt	H1f7	Histone variant	-0.536691	0.134075	-0.799474	-0.273908	-4.0029	6.25697e-05	positive	0.999969	78	195	133	159	10	18	2	2	205	452	48	222	2	13	1	2
RS	mut - wt	H2ax	Histone variant	-1.3552	0.14392	-1.63727	-1.07312	-9.41636	4.67011e-21	positive	1	45	464	24	572	59	1461	77	316	36	893	19	833	18	2638	21	693

## Sheet: 3. GLMM_n2a_H2AB3OE - wt
tissue_type	contrast	gene_symbol	transcript_class	estimate	SE	asymp.LCL	asymp.UCL	z.ratio	p.value.two.sided	expected_direction	p.value.one.sided	2023-10-18_n2a_wt_rep1_full	2023-10-18_n2a_wt_rep1_trunc	2023-10-21_n2a_wt_rep2_full	2023-10-21_n2a_wt_rep2_trunc	2023-10-28_n2a_wt_rep3_full	2023-10-28_n2a_wt_rep3_trunc	2023-10-18_n2a_lap1_over_rep1_full	2023-10-18_n2a_lap1_over_rep1_trunc	2023-10-21_n2a_lap1_over_rep2_full	2023-10-21_n2a_lap1_over_rep2_trunc	2023-10-27_n2a_lap1_over_rep3_full	2023-10-27_n2a_lap1_over_rep3_trunc
n2a	lap1_over - wt	H4c18	Core histone	-0.606791	0.100312	-0.841892	-0.37169	-6.04905	4.36943e-09	negative	2.18471e-09	300	65	2762	321	88	18	214	101	1914	428	99	30
n2a	lap1_over - wt	H4c6	Core histone	-0.740801	0.125184	-1.03419	-0.447407	-5.9177	9.78941e-09	negative	4.8947e-09	134	29	1314	155	42	6	81	19	823	238	39	12
n2a	lap1_over - wt	H3c6	Core histone	-0.620687	0.138325	-0.94488	-0.296495	-4.48716	2.15003e-05	negative	1.07502e-05	28	142	223	1057	4	44	24	238	71	811	19	83
n2a	lap1_over - wt	H3c2	Core histone	-0.763522	0.172502	-1.16781	-0.359229	-4.42617	2.8552e-05	negative	1.4276e-05	50	11	336	58	16	3	33	25	319	117	24	14
n2a	lap1_over - wt	H3c7	Core histone	-0.559916	0.133065	-0.871781	-0.24805	-4.20782	7.64921e-05	negative	3.8246e-05	72	25	524	152	19	5	57	47	406	209	29	17
n2a	lap1_over - wt	H4c8	Core histone	-0.527896	0.133285	-0.840276	-0.215516	-3.96066	0.00022057	negative	0.000110285	94	28	646	153	31	5	246	78	201	136	58	17
n2a	lap1_over - wt	H2bc27	Core histone	-0.450343	0.114107	-0.717776	-0.182909	-3.94666	0.000233782	negative	0.000116891	108	48	750	327	19	13	71	54	444	336	32	15
n2a	lap1_over - wt	H4c12	Core histone	-0.544893	0.164781	-0.93109	-0.158696	-3.30677	0.00271492	negative	0.00135746	146	13	1367	70	51	2	165	21	813	76	67	9
n2a	lap1_over - wt	H4c1	Core histone	-0.382965	0.11806	-0.659661	-0.106268	-3.24382	0.0033802	negative	0.0016901	34	38	556	309	12	12	20	43	433	374	15	20
n2a	lap1_over - wt	H2bc8	Core histone	-0.354377	0.11283	-0.618815	-0.0899379	-3.14081	0.00479703	negative	0.00239851	74	40	697	355	26	12	16	23	562	411	8	16
n2a	lap1_over - wt	Gm25890	snRNA	-0.336189	0.114937	-0.605568	-0.0668111	-2.92498	0.00964762	negative	0.00482381	183	31	1739	239	101	16	610	126	370	98	266	55
n2a	lap1_over - wt	Gm22513	snRNA	-0.278101	0.0986728	-0.50936	-0.046841	-2.81841	0.0133871	negative	0.00669357	230	46	2385	472	123	24	850	268	492	147	323	81
n2a	lap1_over - wt	H3c10	Core histone	-0.576781	0.222368	-1.09795	-0.055616	-2.59381	0.0257048	negative	0.0128524	76	7	752	28	37	0	61	8	681	48	31	5
n2a	lap1_over - wt	H4c17	Core histone	-0.301956	0.118421	-0.5795	-0.0244127	-2.54985	0.0290289	negative	0.0145144	143	37	1185	187	43	8	144	64	1068	225	52	20
n2a	lap1_over - wt	H3c1	Core histone	-0.432319	0.180315	-0.854924	-0.00971453	-2.39758	0.0435615	negative	0.0217808	60	6	558	57	21	2	41	16	536	79	27	7
n2a	lap1_over - wt	H3c3	Core histone	-0.426848	0.18229	-0.854082	0.000386179	-2.34158	0.0502687	negative	0.0251343	44	4	503	61	12	4	36	23	406	63	17	8
n2a	lap1_over - wt	H2bc15	Core histone	-0.428942	0.190626	-0.875713	0.017829	-2.25017	0.0630647	negative	0.0315323	82	8	813	49	28	2	32	5	660	63	33	8
n2a	lap1_over - wt	H2bc3	Core histone	-0.347633	0.15632	-0.714001	0.0187352	-2.22385	0.0672118	negative	0.0336059	122	12	889	92	32	6	63	26	622	75	58	17
n2a	lap1_over - wt	Gm22317	snRNA	-0.190533	0.0877199	-0.396123	0.0150557	-2.17207	0.0760222	negative	0.0380111	754	93	7534	737	283	44	2628	386	1616	227	1138	142
n2a	lap1_over - wt	Gm23971	snRNA	-0.262849	0.122981	-0.551081	0.0253824	-2.13731	0.0824451	negative	0.0412226	34	73	288	493	16	35	127	334	52	109	64	198
n2a	lap1_over - wt	H2bc12	Core histone	-0.389073	0.18386	-0.819987	0.0418401	-2.11614	0.0865667	negative	0.0432834	62	9	445	57	10	3	53	14	346	70	30	7
n2a	lap1_over - wt	Gm25189	snRNA	-0.416709	0.220247	-0.932902	0.0994846	-1.89201	0.140953	negative	0.0704763	30	4	241	44	13	1	101	39	44	9	53	12
n2a	lap1_over - wt	H1f4	Core histone	-0.21557	0.114341	-0.483552	0.0524113	-1.88532	0.1429	negative	0.0714498	83	43	554	274	27	18	62	60	605	368	31	34
n2a	lap1_over - wt	Gm22614	snRNA	-0.217823	0.117378	-0.492921	0.0572754	-1.85574	0.151762	negative	0.0758811	208	22	1733	249	82	11	622	120	342	76	277	48
n2a	lap1_over - wt	H2bc22	Core histone	-0.382698	0.207049	-0.867959	0.102563	-1.84834	0.154041	negative	0.0770203	23	4	216	52	9	1	19	8	161	57	13	6
n2a	lap1_over - wt	Gm23849	snRNA	-0.185273	0.119052	-0.464296	0.0937497	-1.55623	0.264843	negative	0.132422	33	80	326	478	20	43	145	343	67	95	78	192
n2a	lap1_over - wt	Gm22042	snRNA	-0.197029	0.133545	-0.510019	0.115961	-1.47537	0.302788	negative	0.151394	52	26	370	201	32	15	177	125	105	93	70	39
n2a	lap1_over - wt	H2bc4	Core histone	-0.203316	0.142728	-0.537829	0.131196	-1.4245	0.328217	negative	0.164109	19	33	231	216	6	10	17	31	208	257	4	14
n2a	lap1_over - wt	Gm25679	snRNA	-0.121184	0.0875802	-0.326446	0.0840781	-1.38369	0.349448	negative	0.174724	745	94	7513	766	325	46	2639	398	1671	224	1166	119
n2a	lap1_over - wt	Gm23444	snRNA	-0.206314	0.15094	-0.560072	0.147445	-1.36686	0.35841	negative	0.179205	27	36	142	201	10	22	101	190	25	55	46	102
n2a	lap1_over - wt	Gm26444	snRNA	-0.117285	0.0880119	-0.323559	0.0889881	-1.33261	0.37701	negative	0.188505	764	89	7601	745	313	41	2777	370	1684	218	1131	133
n2a	lap1_over - wt	H3c8	Core histone	-0.253855	0.192275	-0.70449	0.19678	-1.32027	0.383826	negative	0.191913	46	5	390	50	18	8	47	11	338	64	27	4
n2a	lap1_over - wt	H2bc13	Core histone	-0.299283	0.263962	-0.917931	0.319364	-1.13381	0.493193	negative	0.246596	35	5	371	24	12	2	31	9	241	20	17	2
n2a	lap1_over - wt	H2bc14	Core histone	-0.220598	0.197605	-0.683724	0.242528	-1.11636	0.503929	negative	0.251965	42	9	301	52	7	2	16	8	289	61	10	6
n2a	lap1_over - wt	Gm26244	snRNA	-0.104618	0.0968995	-0.331722	0.122485	-1.07966	0.52671	negative	0.263355	231	60	2578	541	127	25	1021	284	426	133	405	86
n2a	lap1_over - wt	Gm22155	snRNA	-0.530873	0.545138	-1.80851	0.746767	-0.973832	0.593441	negative	0.296721	22	0	122	3	9	0	58	6	54	0	9	0
n2a	lap1_over - wt	Gm24950	snRNA	-0.104431	0.120851	-0.387668	0.178807	-0.864132	0.662956	negative	0.331478	27	60	318	548	15	42	134	333	67	89	63	185
n2a	lap1_over - wt	Gm24305	snRNA	-0.0648078	0.0875566	-0.270014	0.140399	-0.740182	0.739553	negative	0.369777	780	110	7780	805	300	35	2693	363	1689	231	1135	123
n2a	lap1_over - wt	H1f3	Core histone	-0.472532	0.768755	-2.27426	1.3292	-0.614672	0.812095	negative	0.406047	0	111	1	541	0	48	0	132	0	677	0	81
n2a	lap1_over - wt	Rnu2-10	snRNA	-0.0676299	0.118336	-0.344974	0.209714	-0.571508	0.83531	negative	0.417655	27	78	347	541	11	34	146	347	72	90	78	179
n2a	lap1_over - wt	Gm25134	snRNA	-0.513853	1.30425	-3.57061	2.54291	-0.393985	0.918006	negative	0.459003	0	0	9	0	0	0	6	0	2	0	1	0
n2a	lap1_over - wt	Gm25360	snRNA	-0.0696601	0.293467	-0.757459	0.618139	-0.237369	0.969417	negative	0.484708	3	17	21	77	1	8	17	78	6	28	8	44
n2a	lap1_over - wt	H2bc11	Core histone	-0.0406759	0.182669	-0.468798	0.387446	-0.222675	0.973036	negative	0.486518	47	8	438	68	14	0	57	9	395	66	36	8
n2a	lap1_over - wt	H1f2	Core histone	-0.1252	0.637872	-1.62018	1.36978	-0.196278	0.978986	negative	0.489493	1	175	1	814	0	44	0	156	2	1011	0	67
n2a	lap1_over - wt	Gm22868	snRNA	-0.275737	1.59175	-4.00632	3.45484	-0.173229	0.983593	negative	0.491796	0	0	4	0	0	0	2	0	0	0	0	0
n2a	lap1_over - wt	H4c4	Core histone	-0.0626888	0.767873	-1.86235	1.73697	-0.0816396	0.996332	negative	0.498166	0	195	1	1813	0	57	0	179	0	1512	0	70
n2a	lap1_over - wt	Rnu1b1	snRNA	0.0158016	0.127249	-0.282433	0.314036	0.124178	0.991535	negative	0.504233	66	18	467	245	40	23	219	129	146	76	91	47
n2a	lap1_over - wt	H2bc23	Core histone	0.0397001	0.106022	-0.208784	0.288184	0.374452	0.92563	negative	0.537185	71	99	608	742	18	29	46	46	419	536	26	43
n2a	lap1_over - wt	Gm25514	snRNA	0.52658	1.2896	-2.49587	3.54903	0.408327	0.912204	negative	0.543898	4	0	9	0	1	0	10	0	0	0	1	0
n2a	lap1_over - wt	H4c3	Core histone	0.352222	0.583236	-1.01471	1.71915	0.60391	0.817978	negative	0.591011	1	134	2	1224	0	33	0	167	3	837	0	48
n2a	lap1_over - wt	Gm25099	snRNA	0.680052	1.09095	-1.8768	3.23691	0.623358	0.807302	negative	0.596349	0	1	2	1	0	0	6	2	2	0	1	0
n2a	lap1_over - wt	H1f1	Core histone	0.138228	0.199874	-0.330218	0.606674	0.691574	0.768418	negative	0.615791	66	6	404	53	12	1	60	1	455	58	34	4
n2a	lap1_over - wt	H2bc6	Core histone	0.341134	0.45751	-0.731133	1.4134	0.745631	0.736267	negative	0.631866	1	100	3	829	0	24	1	46	3	780	0	49
n2a	lap1_over - wt	Gm25313	snRNA	1.12346	1.39763	-2.15217	4.39908	0.803829	0.700645	negative	0.649677	0	0	3	1	0	0	4	0	0	0	1	0
n2a	lap1_over - wt	H4c11	Core histone	0.548748	0.675578	-1.0346	2.1321	0.812264	0.695413	negative	0.652293	0	197	1	1647	0	46	0	242	2	1129	0	99
n2a	lap1_over - wt	H2bc24	Core histone	0.0874306	0.105543	-0.159932	0.334793	0.828385	0.685374	negative	0.657313	64	91	624	799	22	20	42	50	432	528	26	47
n2a	lap1_over - wt	H2bc1	Core histone	0.417324	0.451715	-0.64136	1.47601	0.923866	0.625168	negative	0.687416	0	5	7	34	1	2	0	2	12	37	1	2
n2a	lap1_over - wt	H4c16	Core histone	0.746714	0.677076	-0.840149	2.33358	1.10285	0.512285	negative	0.743857	0	109	1	654	0	32	0	107	2	343	0	56
n2a	lap1_over - wt	Gm24407	snRNA	0.280568	0.158208	-0.0902231	0.651359	1.77342	0.178553	negative	0.910724	43	19	739	138	26	1	277	49	175	33	86	8
n2a	lap1_over - wt	Gm24265	snRNA	0.282815	0.150788	-0.0705869	0.636218	1.87558	0.145775	negative	0.927113	106	8	1142	154	49	4	412	36	323	41	164	20

## Sheet: 4.GLMM_n2a_H2AB3OE_upf1KD- B3OE
tissue_type	contrast	gene_symbol	transcript_class	estimate	SE	asymp.LCL	asymp.UCL	z.ratio	p.value.two.sided	expected_direction	p.value.one.sided	2023-10-18_n2a_lap1_over_rep1_full	2023-10-18_n2a_lap1_over_rep1_trunc	2023-10-21_n2a_lap1_over_rep2_full	2023-10-21_n2a_lap1_over_rep2_trunc	2023-10-27_n2a_lap1_over_rep3_full	2023-10-27_n2a_lap1_over_rep3_trunc	2024-03-31_n2a_upf1_lap1_rep1_full	2024-03-31_n2a_upf1_lap1_rep1_trunc	2024-04-08_n2a_upf1_lap1_rep3_test_fixed_full	2024-04-08_n2a_upf1_lap1_rep3_test_fixed_trunc	2024-04-08_n2a_upf1_lap1_rep4_test_full	2024-04-08_n2a_upf1_lap1_rep4_test_trunc
n2a	upf1_lap1 - lap1_over	H4c18	Core histone	1.23061	0.104243	0.986296	1.47493	11.8052	0	positive	0	214	101	1914	428	99	30	2494	173	51	9	1626	130
n2a	upf1_lap1 - lap1_over	H3c6	Core histone	1.12696	0.131866	0.817907	1.43602	8.54625	2.74225e-14	positive	1.37113e-14	24	238	71	811	19	83	292	833	7	21	170	641
n2a	upf1_lap1 - lap1_over	H4c6	Core histone	1.06535	0.130386	0.759768	1.37094	8.17074	3.67484e-14	positive	1.83742e-14	81	19	823	238	39	12	958	86	20	1	563	67
n2a	upf1_lap1 - lap1_over	H3c7	Core histone	1.04598	0.129093	0.743427	1.34854	8.10253	3.90799e-14	positive	1.95399e-14	57	47	406	209	29	17	579	96	11	1	434	107
n2a	upf1_lap1 - lap1_over	H4c1	Core histone	0.868451	0.114657	0.599729	1.13717	7.57433	1.27343e-13	positive	6.36713e-14	20	43	433	374	15	20	583	202	9	5	399	194
n2a	upf1_lap1 - lap1_over	H2bc27	Core histone	0.834311	0.112613	0.57038	1.09824	7.40866	4.02789e-13	positive	2.01394e-13	71	54	444	336	32	15	647	211	14	6	589	198
n2a	upf1_lap1 - lap1_over	H2bc8	Core histone	0.829183	0.113327	0.563579	1.09479	7.31674	7.8304e-13	positive	3.9152e-13	16	23	562	411	8	16	548	171	14	6	485	191
n2a	upf1_lap1 - lap1_over	H4c8	Core histone	0.939399	0.13971	0.61196	1.26684	6.72391	5.3094e-11	positive	2.6547e-11	246	78	201	136	58	17	503	76	13	0	304	65
n2a	upf1_lap1 - lap1_over	H4c17	Core histone	0.851843	0.127747	0.552442	1.15124	6.6682	7.77041e-11	positive	3.8852e-11	144	64	1068	225	52	20	752	71	19	1	660	81
n2a	upf1_lap1 - lap1_over	H3c2	Core histone	1.09221	0.168714	0.696798	1.48763	6.47375	2.86783e-10	positive	1.43392e-10	33	25	319	117	24	14	288	44	6	2	252	31
n2a	upf1_lap1 - lap1_over	Gm22513	snRNA	0.544298	0.100349	0.30911	0.779487	5.42404	1.74577e-07	positive	8.72885e-08	850	268	492	147	323	81	1789	240	47	5	1112	243
n2a	upf1_lap1 - lap1_over	Gm24305	snRNA	0.485286	0.0898814	0.274631	0.695941	5.39918	2.00564e-07	positive	1.00282e-07	2693	363	1689	231	1135	123	5726	356	130	12	3933	387
n2a	upf1_lap1 - lap1_over	H2bc3	Core histone	0.846306	0.161513	0.467768	1.22484	5.23987	4.81194e-07	positive	2.40597e-07	63	26	622	75	58	17	730	58	19	0	572	34
n2a	upf1_lap1 - lap1_over	H1f4	Core histone	0.512883	0.107048	0.261995	0.76377	4.79116	4.95381e-06	positive	2.4769e-06	62	60	605	368	31	34	525	278	13	15	735	237
n2a	upf1_lap1 - lap1_over	Gm25890	snRNA	0.535011	0.114313	0.267096	0.802926	4.68023	8.5527e-06	positive	4.27635e-06	610	126	370	98	266	55	1567	177	26	2	864	129
n2a	upf1_lap1 - lap1_over	Gm22317	snRNA	0.41491	0.0887024	0.207019	0.622802	4.67756	8.66496e-06	positive	4.33248e-06	2628	386	1616	227	1138	142	5517	423	130	6	3875	422
n2a	upf1_lap1 - lap1_over	H2bc15	Core histone	0.855165	0.194137	0.400167	1.31016	4.40496	3.14838e-05	positive	1.57419e-05	32	5	660	63	33	8	637	26	12	1	529	27
n2a	upf1_lap1 - lap1_over	Gm25679	snRNA	0.379436	0.0886751	0.171608	0.587264	4.27895	5.57735e-05	positive	2.78868e-05	2639	398	1671	224	1166	119	5617	424	136	9	3957	435
n2a	upf1_lap1 - lap1_over	H3c1	Core histone	0.750131	0.177423	0.334306	1.16596	4.22794	6.99909e-05	positive	3.49954e-05	41	16	536	79	27	7	471	38	10	2	366	29
n2a	upf1_lap1 - lap1_over	H3c3	Core histone	0.769643	0.184793	0.336543	1.20274	4.16489	9.23385e-05	positive	4.61692e-05	36	23	406	63	17	8	358	35	6	0	298	29
n2a	upf1_lap1 - lap1_over	H3c8	Core histone	0.809224	0.194915	0.352401	1.26605	4.15167	9.78143e-05	positive	4.89072e-05	47	11	338	64	27	4	324	31	13	1	316	25
n2a	upf1_lap1 - lap1_over	Gm26444	snRNA	0.370594	0.0893638	0.161152	0.580036	4.14702	9.98092e-05	positive	4.99046e-05	2777	370	1684	218	1131	133	5541	413	122	11	3790	386
n2a	upf1_lap1 - lap1_over	H4c12	Core histone	0.70126	0.169799	0.303303	1.09922	4.12995	0.000107482	positive	5.37411e-05	165	21	813	76	67	9	892	49	8	0	586	26
n2a	upf1_lap1 - lap1_over	Gm22614	snRNA	0.467869	0.116919	0.193845	0.741892	4.00164	0.000185821	positive	9.29103e-05	622	120	342	76	277	48	1544	158	39	2	934	137
n2a	upf1_lap1 - lap1_over	H2bc4	Core histone	0.54213	0.141775	0.209852	0.874408	3.82387	0.000386226	positive	0.000193113	17	31	208	257	4	14	162	118	4	2	142	125
n2a	upf1_lap1 - lap1_over	H3c10	Core histone	0.752099	0.208306	0.263891	1.24031	3.61054	0.000891733	positive	0.000445867	61	8	681	48	31	5	666	26	16	0	529	20
n2a	upf1_lap1 - lap1_over	H2bc11	Core histone	0.662306	0.193406	0.20902	1.11559	3.42443	0.00178331	positive	0.000891657	57	9	395	66	36	8	339	35	7	0	284	21
n2a	upf1_lap1 - lap1_over	Gm23971	snRNA	0.372049	0.116842	0.0982061	0.645891	3.1842	0.00414475	positive	0.00207237	127	334	52	109	64	198	352	570	3	6	185	348
n2a	upf1_lap1 - lap1_over	H2bc12	Core histone	0.5489	0.184575	0.116312	0.981488	2.97386	0.00826983	positive	0.00413491	53	14	346	70	30	7	307	39	6	0	234	29
n2a	upf1_lap1 - lap1_over	Gm26244	snRNA	0.255288	0.0971834	0.0275193	0.483057	2.62687	0.0234271	positive	0.0117135	1021	284	426	133	405	86	1999	358	45	7	1224	289
n2a	upf1_lap1 - lap1_over	Gm25189	snRNA	0.54077	0.215639	0.0353774	1.04616	2.50776	0.0325535	positive	0.0162768	101	39	44	9	53	12	234	35	6	0	91	19
n2a	upf1_lap1 - lap1_over	H1f1	Core histone	0.346088	0.190115	-0.0994844	0.791661	1.82042	0.162871	positive	0.0814354	60	1	455	58	34	4	434	45	9	1	438	29
n2a	upf1_lap1 - lap1_over	H2bc22	Core histone	0.354934	0.200716	-0.115484	0.825352	1.76834	0.18031	positive	0.090155	19	8	161	57	13	6	138	36	4	1	119	32
n2a	upf1_lap1 - lap1_over	H2bc13	Core histone	0.438526	0.262442	-0.176559	1.05361	1.67095	0.21641	positive	0.108205	31	9	241	20	17	2	256	16	1	0	195	17
n2a	upf1_lap1 - lap1_over	Rnu1b1	snRNA	0.212147	0.12946	-0.0912687	0.515563	1.63871	0.229375	positive	0.114687	219	129	146	76	91	47	304	135	11	2	272	118
n2a	upf1_lap1 - lap1_over	Gm22042	snRNA	0.181044	0.13106	-0.126122	0.488209	1.38138	0.35067	positive	0.175335	177	125	105	93	70	39	278	166	8	1	209	124
n2a	upf1_lap1 - lap1_over	H2bc14	Core histone	0.262691	0.19162	-0.18641	0.711792	1.37089	0.356251	positive	0.178125	16	8	289	61	10	6	247	41	9	0	138	33
n2a	upf1_lap1 - lap1_over	Gm23444	snRNA	0.168956	0.145985	-0.17319	0.511102	1.15735	0.478822	positive	0.239411	101	190	25	55	46	102	133	214	3	1	75	122
n2a	upf1_lap1 - lap1_over	Gm25099	snRNA	1.14071	1.20921	-1.69331	3.97474	0.943355	0.612794	positive	0.306397	6	2	2	0	1	0	8	0	0	0	1	0
n2a	upf1_lap1 - lap1_over	H2bc1	Core histone	0.346993	0.384647	-0.554504	1.24849	0.902108	0.638964	positive	0.319482	0	2	12	37	1	2	12	24	0	0	12	27
n2a	upf1_lap1 - lap1_over	Gm24950	snRNA	0.048613	0.117175	-0.226011	0.323237	0.414874	0.9095	positive	0.45475	134	333	67	89	63	185	283	640	4	8	171	291
n2a	upf1_lap1 - lap1_over	Rnu2-10	snRNA	0.0275122	0.11521	-0.242506	0.297531	0.2388	0.969053	positive	0.484527	146	347	72	90	78	179	313	594	2	6	161	303
n2a	upf1_lap1 - lap1_over	Gm25134	snRNA	0.193392	1.08809	-2.35678	2.74356	0.177734	0.982736	positive	0.491368	6	0	2	0	1	0	8	0	0	0	3	0
n2a	upf1_lap1 - lap1_over	H2bc24	Core histone	0.0131962	0.103171	-0.228606	0.254998	0.127906	0.991021	positive	0.495511	42	50	432	528	26	47	529	669	9	15	423	541
n2a	upf1_lap1 - lap1_over	Gm25313	snRNA	0.158836	1.52976	-3.42647	3.74414	0.103831	0.994074	positive	0.497037	4	0	0	0	1	0	6	0	0	0	1	0
n2a	upf1_lap1 - lap1_over	H2bc23	Core histone	0.00374267	0.103562	-0.238976	0.246461	0.0361394	0.99928	positive	0.49964	46	46	419	536	26	43	490	609	13	23	415	577
n2a	upf1_lap1 - lap1_over	H2bc6	Core histone	0.0119494	0.405894	-0.939345	0.963244	0.0294398	0.999522	positive	0.499761	1	46	3	780	0	49	5	675	1	15	4	535
n2a	upf1_lap1 - lap1_over	H4c11	Core histone	0.0118523	0.590841	-1.3729	1.39661	0.0200601	0.999778	positive	0.499889	0	242	2	1129	0	99	1	1157	0	25	3	890
n2a	upf1_lap1 - lap1_over	Gm24407	snRNA	0.00180861	0.15216	-0.35481	0.358427	0.0118862	0.999922	positive	0.499961	277	49	175	33	86	8	755	118	16	5	523	88
n2a	upf1_lap1 - lap1_over	Gm22868	snRNA	-0.00289342	1.63641	-3.83815	3.83236	-0.00176815	0.999998	positive	0.500001	2	0	0	0	0	0	1	0	0	0	2	0
n2a	upf1_lap1 - lap1_over	H1f2	Core histone	-0.0363992	0.591076	-1.4217	1.3489	-0.0615813	0.997911	positive	0.501044	0	156	2	1011	0	67	1	904	0	21	3	935
n2a	upf1_lap1 - lap1_over	H1f3	Core histone	-0.10573	0.711809	-1.774	1.56254	-0.148537	0.98791	positive	0.506045	0	132	0	677	0	81	1	838	0	32	2	1205
n2a	upf1_lap1 - lap1_over	H4c3	Core histone	-0.236771	0.562434	-1.55495	1.08141	-0.420975	0.906948	positive	0.546526	0	167	3	837	0	48	1	972	0	16	3	584
n2a	upf1_lap1 - lap1_over	H4c4	Core histone	-0.351842	0.820131	-2.27398	1.5703	-0.429007	0.903543	positive	0.548228	0	179	0	1512	0	70	0	1457	0	29	0	1087
n2a	upf1_lap1 - lap1_over	Gm24265	snRNA	-0.0739836	0.145471	-0.414925	0.266958	-0.508578	0.867166	positive	0.566417	412	36	323	41	164	20	1199	123	21	4	730	95
n2a	upf1_lap1 - lap1_over	Gm25514	snRNA	-0.705847	1.29581	-3.74283	2.33114	-0.544716	0.849179	positive	0.575411	10	0	0	0	1	0	6	0	1	0	4	0
n2a	upf1_lap1 - lap1_over	H4c16	Core histone	-0.364496	0.639084	-1.86232	1.13332	-0.570342	0.835923	positive	0.582039	0	107	2	343	0	56	1	432	0	6	1	295
n2a	upf1_lap1 - lap1_over	Gm22155	snRNA	-0.29339	0.473454	-1.40303	0.816244	-0.619681	0.809336	positive	0.595332	58	6	54	0	9	0	44	3	0	0	67	6
n2a	upf1_lap1 - lap1_over	Gm25360	snRNA	-0.223625	0.301027	-0.929143	0.481892	-0.742874	0.737931	positive	0.631034	17	78	6	28	8	44	14	78	0	0	8	48
n2a	upf1_lap1 - lap1_over	Gm23849	snRNA	-0.0938303	0.115844	-0.365335	0.177674	-0.809969	0.696838	positive	0.651581	145	343	67	95	78	192	291	634	4	4	140	336
n2a	upf1_lap1 - lap1_over	Gm23287	snRNA	-0.394566	0.795975	-1.95465	1.16552	-0.495702	0.620105	positive	0.689948	5	1	0	0	2	1	7	3	0	0	1	1

## Sheet: 5. GLMM_n2a_upf1KD_H2AB3OE - wt
tissue_type	contrast	gene_symbol	transcript_class	estimate	SE	asymp.LCL	asymp.UCL	z.ratio	p.value.two.sided	expected_direction	p.value.one.sided	2023-10-18_n2a_wt_rep1_full	2023-10-18_n2a_wt_rep1_trunc	2023-10-21_n2a_wt_rep2_full	2023-10-21_n2a_wt_rep2_trunc	2023-10-28_n2a_wt_rep3_full	2023-10-28_n2a_wt_rep3_trunc	2024-03-31_n2a_upf1_H2AB3_rep1_full	2024-03-31_n2a_upf1_H2AB3_rep1_trunc	2024-04-08_n2a_upf1_H2AB3_rep3_test_fixed_full	2024-04-08_n2a_upf1_H2AB3_rep3_test_fixed_trunc	2024-04-08_n2a_upf1_H2AB3_rep4_test_full	2024-04-08_n2a_upf1_H2AB3_rep4_test_trunc
n2a	upf1_H2AB3 - wt	H4c18	Core histone	0.62382	0.107224	0.372519	0.87512	5.81792	1.78645e-08	two.sided	1.78645e-08	300	65	2762	321	88	18	2494	173	51	9	1626	130
n2a	upf1_H2AB3 - wt	Gm24305	snRNA	0.420478	0.0888326	0.212281	0.628675	4.73338	6.5938e-06	two.sided	6.5938e-06	780	110	7780	805	300	35	5726	356	130	12	3933	387
n2a	upf1_H2AB3 - wt	H3c6	Core histone	0.506275	0.113102	0.241198	0.771352	4.47628	2.26226e-05	two.sided	2.26226e-05	28	142	223	1057	4	44	292	833	7	21	170	641
n2a	upf1_H2AB3 - wt	H2bc8	Core histone	0.474806	0.112505	0.211128	0.738485	4.2203	7.23939e-05	two.sided	7.23939e-05	74	40	697	355	26	12	548	171	14	6	485	191
n2a	upf1_H2AB3 - wt	H4c1	Core histone	0.485487	0.115103	0.215719	0.755254	4.21784	7.31847e-05	two.sided	7.31847e-05	34	38	556	309	12	12	583	202	9	5	399	194
n2a	upf1_H2AB3 - wt	H4c17	Core histone	0.549886	0.131897	0.24076	0.859013	4.16906	9.06696e-05	two.sided	9.06696e-05	143	37	1185	187	43	8	752	71	19	1	660	81
n2a	upf1_H2AB3 - wt	H3c7	Core histone	0.486068	0.1347	0.170372	0.801763	3.60853	0.000898601	two.sided	0.000898601	72	25	524	152	19	5	579	96	11	1	434	107
n2a	upf1_H2AB3 - wt	H2bc27	Core histone	0.383968	0.110461	0.12508	0.642856	3.47605	0.00147656	two.sided	0.00147656	108	48	750	327	19	13	647	211	14	6	589	198
n2a	upf1_H2AB3 - wt	H2bc11	Core histone	0.62163	0.196252	0.161675	1.08159	3.16751	0.00438541	two.sided	0.00438541	47	8	438	68	14	0	339	35	7	0	284	21
n2a	upf1_H2AB3 - wt	H2bc3	Core histone	0.498673	0.16244	0.117962	0.879383	3.06989	0.00606658	two.sided	0.00606658	122	12	889	92	32	6	730	58	19	0	572	34
n2a	upf1_H2AB3 - wt	Gm25679	snRNA	0.258253	0.0881421	0.0516737	0.464831	2.92996	0.00949865	two.sided	0.00949865	745	94	7513	766	325	46	5617	424	136	9	3957	435
n2a	upf1_H2AB3 - wt	H4c8	Core histone	0.411503	0.141545	0.0797633	0.743243	2.90722	0.0101973	two.sided	0.0101973	94	28	646	153	31	5	503	76	13	0	304	65
n2a	upf1_H2AB3 - wt	Gm26444	snRNA	0.253308	0.0888559	0.0450568	0.46156	2.85078	0.0121342	two.sided	0.0121342	764	89	7601	745	313	41	5541	413	122	11	3790	386
n2a	upf1_H2AB3 - wt	H3c8	Core histone	0.555369	0.202006	0.0819273	1.02881	2.74927	0.016455	two.sided	0.016455	46	5	390	50	18	8	324	31	13	1	316	25
n2a	upf1_H2AB3 - wt	Gm22513	snRNA	0.266197	0.0993575	0.0333333	0.499062	2.67919	0.0201816	two.sided	0.0201816	230	46	2385	472	123	24	1789	240	47	5	1112	243
n2a	upf1_H2AB3 - wt	H1f4	Core histone	0.297312	0.111372	0.0362893	0.558336	2.66954	0.0207488	two.sided	0.0207488	83	43	554	274	27	18	525	278	13	15	735	237
n2a	upf1_H2AB3 - wt	Gm22317	snRNA	0.224377	0.0885512	0.0168396	0.431914	2.53387	0.0303264	two.sided	0.0303264	754	93	7534	737	283	44	5517	423	130	6	3875	422
n2a	upf1_H2AB3 - wt	H1f1	Core histone	0.484316	0.192881	0.0322606	0.936372	2.51096	0.0322734	two.sided	0.0322734	66	6	404	53	12	1	434	45	9	1	438	29
n2a	upf1_H2AB3 - wt	Gm23849	snRNA	-0.279103	0.113537	-0.5452	-0.0130071	-2.45826	0.0371621	two.sided	0.0371621	33	80	326	478	20	43	291	634	4	4	140	336
n2a	upf1_H2AB3 - wt	H4c6	Core histone	0.324554	0.13486	0.00848299	0.640624	2.4066	0.0425544	two.sided	0.0425544	134	29	1314	155	42	6	958	86	20	1	563	67
n2a	upf1_H2AB3 - wt	H2bc4	Core histone	0.338813	0.142347	0.00519478	0.672432	2.38019	0.0455576	two.sided	0.0455576	19	33	231	216	6	10	162	118	4	2	142	125
n2a	upf1_H2AB3 - wt	Gm22614	snRNA	0.250046	0.114133	-0.0174485	0.517541	2.19082	0.0727286	two.sided	0.0727286	208	22	1733	249	82	11	1544	158	39	2	934	137
n2a	upf1_H2AB3 - wt	H2bc15	Core histone	0.426223	0.202294	-0.0478931	0.900339	2.10695	0.0884055	two.sided	0.0884055	82	8	813	49	28	2	637	26	12	1	529	27
n2a	upf1_H2AB3 - wt	Gm24407	snRNA	0.282377	0.135002	-0.0340276	0.598781	2.09165	0.0915379	two.sided	0.0915379	43	19	739	138	26	1	755	118	16	5	523	88
n2a	upf1_H2AB3 - wt	H2bc1	Core histone	0.764317	0.420117	-0.220312	1.74895	1.8193	0.163233	two.sided	0.163233	0	5	7	34	1	2	12	24	0	0	12	27
n2a	upf1_H2AB3 - wt	Rnu1b1	snRNA	0.227949	0.126621	-0.0688138	0.524711	1.80024	0.169476	two.sided	0.169476	66	18	467	245	40	23	304	135	11	2	272	118
n2a	upf1_H2AB3 - wt	H3c3	Core histone	0.342795	0.193515	-0.110746	0.796336	1.77141	0.179245	two.sided	0.179245	44	4	503	61	12	4	358	35	6	0	298	29
n2a	upf1_H2AB3 - wt	Gm25890	snRNA	0.198821	0.113458	-0.0670898	0.464733	1.75238	0.185912	two.sided	0.185912	183	31	1739	239	101	16	1567	177	26	2	864	129
n2a	upf1_H2AB3 - wt	H3c2	Core histone	0.328692	0.188196	-0.112383	0.769767	1.74654	0.187993	two.sided	0.187993	50	11	336	58	16	3	288	44	6	2	252	31
n2a	upf1_H2AB3 - wt	H3c1	Core histone	0.317812	0.191422	-0.130823	0.766447	1.66027	0.220646	two.sided	0.220646	60	6	558	57	21	2	471	38	10	2	366	29
n2a	upf1_H2AB3 - wt	Gm24265	snRNA	0.208832	0.130245	-0.0964229	0.514087	1.60338	0.244163	two.sided	0.244163	106	8	1142	154	49	4	1199	123	21	4	730	95
n2a	upf1_H2AB3 - wt	Gm26244	snRNA	0.15067	0.0952079	-0.0724691	0.373808	1.58253	0.253174	two.sided	0.253174	231	60	2578	541	127	25	1999	358	45	7	1224	289
n2a	upf1_H2AB3 - wt	Gm22155	snRNA	-0.824263	0.527417	-2.06037	0.411844	-1.56283	0.261885	two.sided	0.261885	22	0	122	3	9	0	44	3	0	0	67	6
n2a	upf1_H2AB3 - wt	Gm25099	snRNA	1.82077	1.39538	-1.44958	5.09111	1.30486	0.392423	two.sided	0.392423	0	1	2	1	0	0	8	0	0	0	1	0
n2a	upf1_H2AB3 - wt	H2bc24	Core histone	0.100627	0.098349	-0.129874	0.331127	1.02316	0.562197	two.sided	0.562197	64	91	624	799	22	20	529	669	9	15	423	541
n2a	upf1_H2AB3 - wt	Gm23971	snRNA	0.109199	0.113261	-0.156251	0.374649	0.964139	0.599595	two.sided	0.599595	34	73	288	493	16	35	352	570	3	6	185	348
n2a	upf1_H2AB3 - wt	Gm25313	snRNA	1.28229	1.37713	-1.94529	4.50987	0.931134	0.620555	two.sided	0.620555	0	0	3	1	0	0	6	0	0	0	1	0
n2a	upf1_H2AB3 - wt	Gm25360	snRNA	-0.293285	0.316391	-1.03481	0.44824	-0.926972	0.623196	two.sided	0.623196	3	17	21	77	1	8	14	78	0	0	8	48
n2a	upf1_H2AB3 - wt	H4c12	Core histone	0.156367	0.175571	-0.25512	0.567853	0.890618	0.646237	two.sided	0.646237	146	13	1367	70	51	2	892	49	8	0	586	26
n2a	upf1_H2AB3 - wt	H1f3	Core histone	-0.578262	0.651183	-2.10444	0.947916	-0.888018	0.647882	two.sided	0.647882	0	111	1	541	0	48	1	838	0	32	2	1205
n2a	upf1_H2AB3 - wt	H4c11	Core histone	0.5606	0.631961	-0.920528	2.04173	0.88708	0.648475	two.sided	0.648475	0	197	1	1647	0	46	1	1157	0	25	3	890
n2a	upf1_H2AB3 - wt	H2bc12	Core histone	0.159826	0.192462	-0.291247	0.610899	0.830432	0.684097	two.sided	0.684097	62	9	445	57	10	3	307	39	6	0	234	29
n2a	upf1_H2AB3 - wt	H2bc6	Core histone	0.353083	0.430085	-0.654908	1.36107	0.820961	0.690004	two.sided	0.690004	1	100	3	829	0	24	5	675	1	15	4	535
n2a	upf1_H2AB3 - wt	H3c10	Core histone	0.175318	0.232387	-0.369327	0.719963	0.754423	0.730945	two.sided	0.730945	76	7	752	28	37	0	666	26	16	0	529	20
n2a	upf1_H2AB3 - wt	Gm23879	snRNA	0.375473	1.53274	-2.62864	3.37959	0.244969	0.806481	two.sided	0.806481	0	0	4	0	0	0	6	0	0	0	1	0
n2a	upf1_H2AB3 - wt	H4c16	Core histone	0.382218	0.676875	-1.20417	1.96861	0.56468	0.838886	two.sided	0.838886	0	109	1	654	0	32	1	432	0	6	1	295
n2a	upf1_H2AB3 - wt	Gm25189	snRNA	0.124062	0.220359	-0.392394	0.640518	0.562997	0.839763	two.sided	0.839763	30	4	241	44	13	1	234	35	6	0	91	19
n2a	upf1_H2AB3 - wt	H4c4	Core histone	-0.414531	0.767906	-2.21427	1.38521	-0.539819	0.851666	two.sided	0.851666	0	195	1	1813	0	57	0	1457	0	29	0	1087
n2a	upf1_H2AB3 - wt	H2bc13	Core histone	0.139243	0.260644	-0.471628	0.750115	0.534228	0.854487	two.sided	0.854487	35	5	371	24	12	2	256	16	1	0	195	17
n2a	upf1_H2AB3 - wt	Gm24950	snRNA	-0.0558179	0.113336	-0.321444	0.209808	-0.492499	0.874888	two.sided	0.874888	27	60	318	548	15	42	283	640	4	8	171	291
n2a	upf1_H2AB3 - wt	H2bc23	Core histone	0.0434428	0.0988919	-0.18833	0.275216	0.439295	0.899108	two.sided	0.899108	71	99	608	742	18	29	490	609	13	23	415	577
n2a	upf1_H2AB3 - wt	Rnu2-10	snRNA	-0.0401177	0.112402	-0.303555	0.223319	-0.356912	0.932195	two.sided	0.932195	27	78	347	541	11	34	313	594	2	6	161	303
n2a	upf1_H2AB3 - wt	H1f2	Core histone	-0.161599	0.591386	-1.54763	1.22443	-0.273256	0.959675	two.sided	0.959675	1	175	1	814	0	44	1	904	0	21	3	935
n2a	upf1_H2AB3 - wt	Gm23444	snRNA	-0.0373578	0.149045	-0.386674	0.311959	-0.250648	0.96596	two.sided	0.96596	27	36	142	201	10	22	133	214	3	1	75	122
n2a	upf1_H2AB3 - wt	Gm25134	snRNA	-0.320461	1.29551	-3.35676	2.71584	-0.247362	0.966832	two.sided	0.966832	0	0	9	0	0	0	8	0	0	0	3	0
n2a	upf1_H2AB3 - wt	H2bc14	Core histone	0.042093	0.196969	-0.419543	0.503729	0.213704	0.975138	two.sided	0.975138	42	9	301	52	7	2	247	41	9	0	138	33
n2a	upf1_H2AB3 - wt	H4c3	Core histone	0.115452	0.56242	-1.20269	1.43359	0.205277	0.977038	two.sided	0.977038	1	134	2	1224	0	33	1	972	0	16	3	584
n2a	upf1_H2AB3 - wt	Gm22868	snRNA	-0.278631	1.59176	-4.00924	3.45198	-0.175045	0.98325	two.sided	0.98325	0	0	4	0	0	0	1	0	0	0	2	0
n2a	upf1_H2AB3 - wt	Gm25514	snRNA	-0.179267	1.07558	-2.70011	2.34158	-0.16667	0.984802	two.sided	0.984802	4	0	9	0	1	0	6	0	1	0	4	0
n2a	upf1_H2AB3 - wt	H2bc22	Core histone	-0.0277638	0.205402	-0.509165	0.453638	-0.135168	0.989978	two.sided	0.989978	23	4	216	52	9	1	138	36	4	1	119	32
n2a	upf1_H2AB3 - wt	Gm22042	snRNA	-0.0159855	0.130221	-0.321186	0.289215	-0.122756	0.991727	two.sided	0.991727	52	26	370	201	32	15	278	166	8	1	209	124

## Sheet: 6. Conserved_Seq_(CS)
Histones class:
H3	CCAGCGCCTGGTGCGCGAGAT
H1	GTGGAGAAGAACAACAGCCG
H4	GTGATCCGCGACGCCGTCACC
H2B	GACATCTTCGAGCGCATCGC
snRNA class:
U1	GAAGGTGGTTATCCCAGG
U2	TTGGAATAGGAGCTTGCTCC
U4	ATATAGTCGGCATTGGCAAT
U5	GATTTCCGTGGAGAGGAACA

## Sheet: 7. RS_CS_heatmap_results
gene_symbol	transcript_class	RS_wt	RS_mut
H1f1	Core histone	35.7203	42.7163
H1f2	Core histone	29.8969	40.6383
H1f3	Core histone	29.0909	46.2366
H1f4	Core histone	44.7368	40.3226
H1f6	Core histone	25.7895	32.8804
H2bc1	Core histone	11.9069	13.0707
H2bc11	Core histone	8.51064	14.8718
H2bc12	Core histone	8.33333	16.7131
H2bc13	Core histone	13.1579	19.7802
H2bc14	Core histone	8.90688	12.8801
H2bc15	Core histone	12.1622	15.847
H2bc22	Core histone	5.12821	11.5385
H2bc23	Core histone	7.89474	11.0155
H2bc24	Core histone	12	13.4058
H2bc27	Core histone	12.8631	19.1011
H2bc3	Core histone	7.09459	8.4195
H2bc4	Core histone	9.87654	17.8082
H2bc6	Core histone	6.31579	14.3411
H2bc8	Core histone	6.49351	11.7647
H3c1	Core histone	24.5989	40.9574
H3c10	Core histone	16.0714	19.0476
H3c2	Core histone	23.5294	32.2222
H3c3	Core histone	35.1852	28.125
H3c6	Core histone	31.8182	41.0256
H3c7	Core histone	25	33.3333
H3c8	Core histone	17.9104	19.8276
H4c1	Core histone	27.027	36.0465
H4c11	Core histone	24.3607	29.4201
H4c12	Core histone	19.403	21.608
H4c16	Core histone	18.9076	21.7593
H4c17	Core histone	22.0779	34.2995
H4c18	Core histone	27.4441	34.1033
H4c3	Core histone	27.1215	34.8315
H4c4	Core histone	34.2593	35.9431
H4c6	Core histone	33.6842	32.3741
H4c8	Core histone	26.4151	28.5078
Gm22042	snRNA	20.1807	16.0643
Gm22068	snRNA	11.0944	9.49264
Gm22317	snRNA	11.4135	10.235
Gm22513	snRNA	9.3617	8.32025
Gm22614	snRNA	19.8295	19.4952
Gm22973	snRNA	48.1328	52.2449
Gm23143	snRNA	4.16667	25
Gm23238	snRNA	12.5571	12.0267
Gm23444	snRNA	43.6026	50.1048
Gm23680	snRNA	10	0
Gm23849	snRNA	48.4087	50.3886
Gm23971	snRNA	48.2109	50.3764
Gm24265	snRNA	42.8376	35.1283
Gm24305	snRNA	11.137	9.68987
Gm24407	snRNA	50	41.721
Gm24950	snRNA	49.7582	50.5578
Gm25189	snRNA	11.5578	13.1313
Gm25360	snRNA	46.1637	47.7143
Gm25587	snRNA	0	10
Gm25679	snRNA	11.6447	10.2094
Gm25682	snRNA	0	14.2857
Gm25818	snRNA	0	0
Gm25890	snRNA	20.4418	19.6497
Gm26108	snRNA	0	0
Gm26444	snRNA	11.6616	9.65847
Rnu1b1	snRNA	13.9183	15.3667
Rnu2-10	snRNA	50.8035	51.3872

## Sheet: 8. N2A_CS_Heatmap_results
gene_symbol	transcript_class	N2a_wt	H2AB3_OE	upf1_KD_H2AB3_OE
H1f1	Core histone	40.0369	32.1895	48.8494
H1f2	Core histone	40.6583	34.0872	46.1662
H1f3	Core histone	48.4286	40.226	50.4096
H1f4	Core histone	41.3586	31.7556	44.5369
H2bc11	Core histone	13.3562	7.29927	21.7391
H2bc12	Core histone	17.5403	8.76777	27.7344
H2bc13	Core histone	14.1689	8.83392	27.5204
H2bc14	Core histone	6.58537	6.08466	17.9704
H2bc15	Core histone	12.9679	5.82524	18.8305
H2bc22	Core histone	12.7148	5.77778	14.2857
H2bc23	Core histone	11.7	6.46976	17.3523
H2bc24	Core histone	12.4733	6.63058	16.4408
H2bc27	Core histone	17.5249	8.10515	21.4782
H2bc3	Core histone	6.48228	3.69089	11.9658
H2bc4	Core histone	12.8329	7.98969	16.6311
H2bc6	Core histone	9.38486	6.16319	15.2927
H2bc8	Core histone	11.5124	4.32973	13.2363
H3c1	Core histone	41.6315	26.8966	39.441
H3c10	Core histone	36.9452	28.1337	37.4886
H3c2	Core histone	33.1765	23.0179	34.0909
H3c3	Core histone	27.7868	23.9168	29.8077
H3c6	Core histone	34.7426	28.165	37.4035
H3c7	Core histone	34.6049	30.0824	41.7167
H3c8	Core histone	32.5959	26.3975	37.2067
H4c1	Core histone	32.6233	23.2587	40.2206
H4c11	Core histone	29.297	21.4904	40.0193
H4c12	Core histone	24.7899	16.9734	33.5917
H4c16	Core histone	20.0124	12.9252	31.0559
H4c17	Core histone	23.5443	19.6617	37.3134
H4c18	Core histone	33.191	23.7764	45.282
H4c3	Core histone	29.6167	22.2327	42.5439
H4c4	Core histone	33.2666	21.9124	43.8743
H4c6	Core histone	31.7115	21.1701	40.93
H4c8	Core histone	28.1803	20.4942	37.5969
Gm22042	snRNA	22.2973	21.6374	30.7692
Gm22068	snRNA	11.7298	9.86722	14.2846
Gm22317	snRNA	12.0715	9.53926	14.1958
Gm22513	snRNA	10.839	7.44552	13.9585
Gm22614	snRNA	21.5859	20.8654	25.9918
Gm22973	snRNA	44	57.1429	51.8519
Gm23143	snRNA	23.0769	15.7895	23.0769
Gm23238	snRNA	11.5625	11.1304	16.0256
Gm23444	snRNA	40.5627	47.7861	38.2401
Gm23680	snRNA	3.7037	0	0
Gm23849	snRNA	45.8748	51.6361	47.4855
Gm23971	snRNA	47.1025	53.4661	45.5234
Gm24265	snRNA	32.3326	36.7961	37.1689
Gm24305	snRNA	11.0065	9.62084	14.7284
Gm24407	snRNA	36.1267	43.4319	41.3288
Gm24950	snRNA	45.8971	54.023	47.7464
Gm25189	snRNA	10.4348	10.4762	11.8881
Gm25360	snRNA	40.4255	48.6486	31.5789
Gm25587	snRNA	50	20	25
Gm25679	snRNA	11.2411	9.2031	15.6208
Gm25682	snRNA	7.14286	0	0
Gm25890	snRNA	23.2207	20.0182	24.652
Gm26444	snRNA	11.637	9.69665	15.0158
Rnu1b1	snRNA	11.7166	6.26959	12.7976
Rnu2-10	snRNA	48.4138	53.5016	47.7407
