# Supplementary material for: Histone Variant H2A.B.3 Orchestrates a New Nuclear Pathway for Histone mRNA Decay
Source: Research Square preprint supplement (doi:10.21203/rs.3.rs-8304477/v1), 2025-12-10
Supplement: Supplementary file 2 [file 69f019f39dc1308a79c59c00.xlsx]

## Sheet: 4reps_RS_combined
	row	baseMean	log2FoldChange	lfcSE	stat	pvalue	gene symbol
4423	ENSMUSG00000100210	54.54791422	1.86166006	0.589757566	3.15665312	0.001595911	H3c7
3862	ENSMUSG00000062727	122.8006279	1.895609727	0.672600158	2.818330778	0.004827405	H2bc12
4022	ENSMUSG00000069306	79.24947516	2.270003419	0.80582182	2.817004159	0.00484739	H4c17
2559	ENSMUSG00000036181	159.1758111	1.868915471	0.666369139	2.804624886	0.005037517	H1f2
4020	ENSMUSG00000069303	138.5084032	2.099353573	0.767145803	2.736577016	0.006208206	H2bc24
484	ENSMUSG00000018102	56.22860055	1.881039951	0.693195711	2.713577018	0.006656109	H2bc4
4016	ENSMUSG00000069267	25.69646651	2.374494715	0.880176815	2.697747402	0.006981039	H3c2
3533	ENSMUSG00000052565	33.45678028	1.665190858	0.629235378	2.646371958	0.00813603	H1f3
4355	ENSMUSG00000094338	44.29104718	2.084440536	0.805863172	2.586593616	0.009692984	H2bc13
4365	ENSMUSG00000095217	99.90083159	2.085317951	0.809347909	2.57654085	0.009979441	H2bc15
3664	ENSMUSG00000056895	140.46844	1.873210627	0.729653922	2.567259041	0.0102506	H2bc27
4023	ENSMUSG00000069307	155.2101764	1.860640048	0.730694098	2.546400818	0.010884014	H2bc23
1199	ENSMUSG00000024528	12.79517159	-1.053255204	0.413657974	-2.54619824	0.010890332	Srfbp1
4021	ENSMUSG00000069305	682.5585662	1.902728668	0.747495253	2.545472576	0.010912994	H4c18
3822	ENSMUSG00000061482	96.46641758	1.763081989	0.701049767	2.514917016	0.01190604	H4c4
4018	ENSMUSG00000069274	80.65151948	2.100665452	0.835815453	2.513312532	0.011960333	H4c6
3498	ENSMUSG00000051627	25.25566405	1.345299245	0.539443366	2.493865584	0.012636039	H1f4
4025	ENSMUSG00000069310	32.08421002	1.622535435	0.658612443	2.463566326	0.013756244	H3c3
4519	ENSMUSG00000114279	167.8916386	2.051411387	0.835697959	2.454728249	0.014099113	H2bc14
4169	ENSMUSG00000075031	203.0123839	1.892561208	0.780399537	2.42511831	0.015303399	H2bc3
3715	ENSMUSG00000058385	23.74503786	1.903070997	0.789473317	2.410557717	0.015928151	H2bc8
2784	ENSMUSG00000038510	11.74853	0.994430967	0.413612981	2.404254733	0.016205477	Rpf2
3233	ENSMUSG00000045394	9.533672751	1.055613952	0.442957089	2.383106574	0.017167224	Epcam
4019	ENSMUSG00000069300	145.0047736	1.965657128	0.837282494	2.347662995	0.018891605	H2bc11
4081	ENSMUSG00000071265	19.79346833	0.787765208	0.342666417	2.298927378	0.021509063	1700086L19Rik
144	ENSMUSG00000003402	9.108729314	-1.217235532	0.529586153	-2.298465558	0.021535306	Prkcsh
3790	ENSMUSG00000060678	491.6599981	1.626023543	0.71312288	2.280144962	0.022599092	H4c3
3968	ENSMUSG00000067455	260.8660172	1.639341025	0.721599236	2.271816465	0.023097598	H4c11
2567	ENSMUSG00000036257	13.79474331	0.818238409	0.36253589	2.256985948	0.024008953	Pnpla8
1684	ENSMUSG00000028322	25.2677593	-0.739505385	0.330316787	-2.238776274	0.025170477	Exosc3
2540	ENSMUSG00000035910	14.68268988	-0.985030979	0.443049546	-2.223297572	0.026195741	Dcdc2a
4015	ENSMUSG00000069265	115.2166037	1.859114576	0.842240057	2.207345236	0.027289949	H3c1
4556	ENSMUSG00000118839	68.84863181	-1.202251711	0.547780677	-2.194768382	0.028180217	Gm25360
3402	ENSMUSG00000049539	633.144689	1.636523066	0.751829516	2.176720962	0.029501393	H1f1
3814	ENSMUSG00000061298	29.66899262	0.915225982	0.422752659	2.164920698	0.030393759	Agbl4
1444	ENSMUSG00000026558	12.60033466	0.88973179	0.413941052	2.149416654	0.031601386	Uck2
3775	ENSMUSG00000060093	80.9391982	1.696158907	0.79365467	2.137149784	0.032585811	H4c1
3916	ENSMUSG00000064288	277.982715	1.566492326	0.742466638	2.109848775	0.034871384	H4c12
1987	ENSMUSG00000030138	14.21844624	-1.115834131	0.531359926	-2.099959138	0.035732436	Bms1
1716	ENSMUSG00000028494	18.30703168	-0.743710764	0.355963035	-2.089292122	0.036681435	Plin2
1364	ENSMUSG00000025921	8.459386089	1.008192155	0.485435359	2.076882402	0.037812414	Rdh10
3655	ENSMUSG00000056515	15.37584488	0.735118076	0.356759549	2.060542113	0.039346744	Rab31
1993	ENSMUSG00000030218	11.05656192	-1.192655657	0.582001005	-2.049232984	0.040439338	Mgp
3918	ENSMUSG00000064317	8.944016094	-1.139377841	0.558943813	-2.038447899	0.04150516	Gm10146
3312	ENSMUSG00000047246	40.76759847	1.59337496	0.79068991	2.015170473	0.04388679	H2bc6
1265	ENSMUSG00000024989	18.32070661	-0.793409681	0.394820967	-2.009542925	0.044479587	Cep55
715	ENSMUSG00000020712	30.23658145	-0.581312071	0.292924897	-1.984508925	0.047199134	Tcam1
1006	ENSMUSG00000022602	38.47078048	-0.539278266	0.27297833	-1.975535077	0.048207458	Arc
202	ENSMUSG00000005204	16.58872571	-0.834744803	0.425838205	-1.960239343	0.049967822	Senp3
1992	ENSMUSG00000030216	52.64924908	-0.544944317	0.278551411	-1.956350945	0.050423827	Wbp11
570	ENSMUSG00000019929	10.63035511	-1.485718325	0.760684998	-1.95313215	0.050803938	Dcn
1490	ENSMUSG00000026854	20.39533407	0.613772491	0.322188806	1.90500874	0.056778935	Usp20
3802	ENSMUSG00000060992	10.12490789	-0.859142063	0.452899229	-1.896982835	0.057830204	Copz1
918	ENSMUSG00000022070	17.56751957	-0.732225319	0.386478101	-1.894610114	0.058144074	Bora
2142	ENSMUSG00000031590	15.97878316	-0.798849834	0.422033116	-1.892860547	0.058376417	Frg1
2419	ENSMUSG00000034152	16.27165873	-0.825940572	0.437147501	-1.889386464	0.058840063	Exoc3
1079	ENSMUSG00000023150	15.86498947	-0.824259977	0.436609647	-1.887864785	0.059044105	Ivns1abp
2399	ENSMUSG00000033916	11.89946375	-0.741832294	0.394164075	-1.882039338	0.059830675	Chmp2a
4242	ENSMUSG00000080712	17.98445744	1.461656923	0.776709651	1.881857553	0.059855359	H2bc26-ps
2227	ENSMUSG00000032076	28.54939969	0.650900466	0.34617955	1.880239503	0.060075444	Cadm1
4280	ENSMUSG00000086080	18.67810086	0.898051796	0.4777038	1.879934377	0.060117022	1700123O12Rik
4203	ENSMUSG00000078652	43.6958805	0.466242191	0.248433999	1.876724576	0.060555853	Psme3
4024	ENSMUSG00000069308	60.2529205	1.045607246	0.561439239	1.86236938	0.062551042	H2bc22
4154	ENSMUSG00000074582	11.98007106	0.712842018	0.383658219	1.858013152	0.063167147	Arfgef2
1900	ENSMUSG00000029458	23.16232972	0.624803902	0.33656058	1.856438155	0.06339113	Brap
4275	ENSMUSG00000085580	11.03195164	0.785941001	0.423735854	1.854789944	0.063626229	1700061F12Rik
2243	ENSMUSG00000032231	12.6544372	-1.065883003	0.576426669	-1.849121598	0.064440256	Anxa2
269	ENSMUSG00000006705	13.98724289	0.750078129	0.40771437	1.839714724	0.065810131	Pknox1
1781	ENSMUSG00000028800	11.34425511	-0.800355854	0.442209699	-1.809901174	0.070311114	Hdac1
539	ENSMUSG00000019297	13.96481221	0.665730262	0.367848696	1.809793727	0.070327781	Nop9
4443	ENSMUSG00000101355	98.32759981	1.554120469	0.859544258	1.808074982	0.070594831	H3c10
4381	ENSMUSG00000096010	155.5577145	1.383753307	0.770018595	1.79703882	0.072329457	H4c16
998	ENSMUSG00000022553	11.15455583	-0.871463858	0.485883408	-1.79356579	0.072882501	Maf1
3238	ENSMUSG00000045482	279.6128598	1.4545294	0.81319546	1.788659027	0.073669745	Trrap
3669	ENSMUSG00000056999	22.07890859	0.524988924	0.296956187	1.767900276	0.077077577	Ide
1024	ENSMUSG00000022723	9.341089271	0.873512022	0.496679962	1.758701958	0.078628145	Crybg3
76	ENSMUSG00000002017	15.2220311	0.707334118	0.403163853	1.754458175	0.079352031	Fam98a
2892	ENSMUSG00000039640	17.42172713	-0.626221627	0.360134579	-1.738854481	0.082060363	Mrpl12
2793	ENSMUSG00000038594	13.27350117	0.658647357	0.379326071	1.736361953	0.082499855	Cep85l
2268	ENSMUSG00000032352	8.629762979	0.870494747	0.502351528	1.732839852	0.083124137	Lrrc1
3486	ENSMUSG00000051331	13.88835107	1.066174984	0.615821689	1.731304699	0.083397434	Cacna1c
3459	ENSMUSG00000050799	1435.46911	1.058826326	0.612540942	1.728580497	0.083884203	H2bc1
477	ENSMUSG00000017774	13.34001159	-0.746540766	0.43282462	-1.724811235	0.084561496	Myo1c
826	ENSMUSG00000021483	11.54856886	-0.722606887	0.420511566	-1.718399556	0.085723761	Cdk20
713	ENSMUSG00000020705	18.07836159	-0.849929707	0.494803059	-1.71771312	0.085848955	Ddx42
1981	ENSMUSG00000030096	23.08848306	-0.612522045	0.358780508	-1.707233338	0.087778691	Slc6a6
2163	ENSMUSG00000031736	15.56724118	0.986776574	0.58037545	1.70023831	0.089086109	Crnde
3476	ENSMUSG00000051159	11.26113965	0.740906716	0.436235474	1.698410056	0.089430395	Cited1
1980	ENSMUSG00000030089	9.290210599	0.85883833	0.506666334	1.695076764	0.090060859	Slc41a3
1650	ENSMUSG00000028018	11.66928669	0.816607859	0.482723438	1.691668137	0.090709267	Gstcd
4572	ENSMUSG00000119892	179.7983743	-1.060576414	0.627008331	-1.691486958	0.090743837	Gm23971
1892	ENSMUSG00000029423	22.32675061	-0.624519621	0.371637305	-1.680454605	0.0928689	Piwil1
3703	ENSMUSG00000058076	11.96071199	-0.718682769	0.429148101	-1.674673073	0.093998393	Sdhc
4447	ENSMUSG00000101540	29.31178044	0.569116757	0.339880964	1.674459056	0.094040415	Gm28465
3789	ENSMUSG00000060639	209.9180352	1.317216274	0.787045565	1.673621365	0.094205037	H4c9
222	ENSMUSG00000005683	12.89330243	-0.713704032	0.429746683	-1.660755186	0.096762625	Cs
50	ENSMUSG00000001376	11.45607379	0.684127986	0.412156273	1.659875225	0.096939556	Vps50
4028	ENSMUSG00000069565	38.4046235	-0.590878978	0.357127847	-1.654530677	0.098019736	Dazap1
1433	ENSMUSG00000026469	11.3545033	0.630992433	0.38179256	1.652710134	0.098389871	Xpr1
416	ENSMUSG00000015176	9.085107649	-0.964129992	0.588870451	-1.637253136	0.101577589	Nolc1
1581	ENSMUSG00000027479	10.45925329	-0.790238487	0.482692852	-1.637145617	0.101600047	Mapre1
1944	ENSMUSG00000029725	28.99729279	-0.61593371	0.376569203	-1.635645468	0.101913809	Ppp1r35
631	ENSMUSG00000020250	10.80645582	-0.732719652	0.448723211	-1.632898933	0.102490255	Txnrd1
316	ENSMUSG00000008763	9.46415773	0.702166036	0.432058053	1.625165951	0.104127203	Man1a2
1496	ENSMUSG00000026880	10.84732151	-0.841258872	0.520171024	-1.617273616	0.105819232	Stom
472	ENSMUSG00000017548	9.655689053	-0.818159043	0.506932926	-1.613939441	0.106540563	Suz12
146	ENSMUSG00000003423	13.34159565	0.634015968	0.393064478	1.613007543	0.106742869	Pih1d1
1505	ENSMUSG00000026924	11.93709835	-0.635787291	0.394786049	-1.610460381	0.107297388	Sec16a
2717	ENSMUSG00000037884	12.51312668	-0.664622017	0.414069454	-1.605097916	0.108472258	1700017G19Rik
266	ENSMUSG00000006673	17.99388758	-0.538108399	0.335426812	-1.604249808	0.108659	Qrich1
1422	ENSMUSG00000026356	19.7404905	-0.64185388	0.400868905	-1.601156568	0.109342246	Dars
3453	ENSMUSG00000050677	18.06312568	-0.574670045	0.358973887	-1.600868656	0.109406013	Ccdc96
1090	ENSMUSG00000023467	11.47317134	0.956565631	0.600920408	1.591834157	0.111421973	Tulp2
73	ENSMUSG00000001909	18.37389594	0.699569015	0.440662998	1.587537455	0.112390971	Trmt1
3001	ENSMUSG00000040812	24.1412286	-0.519408463	0.327191636	-1.587474758	0.11240516	Agbl2
3596	ENSMUSG00000054510	12.42483452	0.757597806	0.478196618	1.584280978	0.113129793	Gm14461
2263	ENSMUSG00000032324	9.222624603	-0.713441495	0.450784501	-1.582666425	0.113497515	Tspan3
185	ENSMUSG00000004789	15.34056562	-0.595353076	0.376858091	-1.579780534	0.114157135	Dlst
3297	ENSMUSG00000046886	10.61565507	0.718787163	0.456559996	1.574354236	0.115405578	Zfp474
2602	ENSMUSG00000036646	15.46147773	0.776795779	0.493910363	1.572746468	0.115777535	Man1b1
558	ENSMUSG00000019834	26.01929243	-0.52612094	0.335701116	-1.567230239	0.117060885	Slc22a16
3197	ENSMUSG00000044581	23.66777792	0.501961208	0.320322735	1.567048335	0.117103394	4932415D10Rik
2857	ENSMUSG00000039193	11.98051063	0.86316163	0.552403358	1.562556812	0.118156873	Nlrc4
4064	ENSMUSG00000070780	10.09239229	0.773877688	0.495623167	1.561423558	0.118423847	Rbm47
3117	ENSMUSG00000042594	10.32523187	0.664140611	0.425869206	1.559494328	0.118879426	Sh2b3
4571	ENSMUSG00000119838	134.9411036	-1.124194334	0.721820681	-1.557442677	0.11936542	Gm23444
3752	ENSMUSG00000059482	13.84528295	-0.567297699	0.364352644	-1.557001737	0.119470073	Cfap418
4017	ENSMUSG00000069273	15.3037342	1.012138578	0.651837233	1.552747413	0.12048349	H3c6
698	ENSMUSG00000020628	12.33280448	-0.590298839	0.381870661	-1.545808307	0.12215087	Trappc12
1985	ENSMUSG00000030126	26.41674347	0.532959375	0.34554072	1.542392382	0.122978272	Tmcc1
820	ENSMUSG00000021411	9.461728991	-0.669279171	0.434417979	-1.540634144	0.123405853	Pxdc1
859	ENSMUSG00000021699	9.706220258	0.848071437	0.55067155	1.540067645	0.123543866	Pde4d
2562	ENSMUSG00000036211	198.3804494	1.093010283	0.711282405	1.536675554	0.12437278	H1f6
1468	ENSMUSG00000026734	10.14677237	0.691902391	0.450676141	1.535254094	0.124721425	4921504E06Rik
2672	ENSMUSG00000037313	24.82012126	-0.702784022	0.45846843	-1.532895126	0.125301697	Tacc3
376	ENSMUSG00000013236	9.98625892	0.975801836	0.638148924	1.529113032	0.126236425	Ptprs
3488	ENSMUSG00000051378	20.5016949	-0.648632223	0.424709088	-1.527238859	0.126701627	Kif18b
1919	ENSMUSG00000029577	17.09703019	0.499495413	0.32723349	1.526418986	0.126905552	Ube3b
41	ENSMUSG00000001120	26.70572855	-0.456760652	0.299959354	-1.522741815	0.127823312	Pcbp3
3876	ENSMUSG00000063163	15.28635513	-0.619349064	0.407532724	-1.519752961	0.128573075	Speer2
4331	ENSMUSG00000091792	15.16164333	0.575244561	0.378535907	1.519656524	0.128597324	Gm3573
582	ENSMUSG00000019986	9.173702667	-0.695607066	0.458306115	-1.517778278	0.129070303	Ahi1
3911	ENSMUSG00000064145	40.23085459	0.485006059	0.319630061	1.51739814	0.129166193	Arih2
2320	ENSMUSG00000032740	11.40173836	-0.692906521	0.457551827	-1.51437822	0.12992994	Ccdc88a
340	ENSMUSG00000010095	11.6175871	-0.720003199	0.475519906	-1.514138924	0.129990608	Slc3a2
1479	ENSMUSG00000026782	9.274970426	0.640914594	0.424134808	1.511110575	0.130760281	Abi2
2651	ENSMUSG00000037104	9.008295193	-0.687163667	0.45515464	-1.509736705	0.131110621	Socs5
1389	ENSMUSG00000026111	39.08391953	-0.638329805	0.423480654	-1.507341122	0.131723242	Unc50
4245	ENSMUSG00000081058	18.59835447	1.063143425	0.707005331	1.503727593	0.132651521	H3c15
193	ENSMUSG00000004947	10.1595998	-0.822690842	0.54713811	-1.503625551	0.132677808	Dtx2
3780	ENSMUSG00000060176	9.777875818	0.775985043	0.519672131	1.493220431	0.135379496	Kif27
1013	ENSMUSG00000022637	10.51766213	-0.823341653	0.551509901	-1.49288644	0.135466915	Cblb
1958	ENSMUSG00000029833	36.80416767	-0.383117037	0.256929922	-1.491134368	0.135926221	Trim24
4393	ENSMUSG00000096732	13.22684266	0.810847124	0.544041027	1.490415398	0.136115046	Gm8897
4092	ENSMUSG00000071655	17.33340426	-0.543049392	0.364922828	-1.488121187	0.136718937	Ubxn1
3080	ENSMUSG00000041842	26.82381578	0.736723644	0.495577676	1.486595704	0.137121623	Fhdc1
613	ENSMUSG00000020163	10.59962808	-0.91840169	0.617839231	-1.486473574	0.137153902	Uqcr11
356	ENSMUSG00000010914	10.26367604	-0.671254855	0.452621504	-1.483037923	0.138064335	Pdhx
2256	ENSMUSG00000032293	13.38242973	-0.555436034	0.375250602	-1.480173599	0.138826924	Ireb2
574	ENSMUSG00000019948	19.13732466	-0.663804285	0.448688556	-1.479432172	0.139024847	Actr6
329	ENSMUSG00000009549	61.06528843	-0.414662293	0.280649014	-1.477512025	0.139538437	Srp14
3900	ENSMUSG00000063884	10.73371175	-0.676064566	0.458262878	-1.475276742	0.140138157	Ptcd3
2788	ENSMUSG00000038546	14.14414306	0.707876394	0.481013464	1.4716353	0.141119388	Ranbp9
3663	ENSMUSG00000056851	10.4384109	0.681525896	0.463276324	1.471100207	0.141264019	Pcbp2
198	ENSMUSG00000005103	19.30728887	0.692490069	0.471036027	1.470142471	0.141523172	Wdr1
3262	ENSMUSG00000046186	12.45274263	0.612477887	0.417171832	1.468166928	0.142058885	Cd109
3250	ENSMUSG00000045915	13.59531379	-0.561519888	0.382544991	-1.467853198	0.142144103	Ccdc42
7	ENSMUSG00000000168	22.34073847	-0.465819196	0.317833824	-1.465606115	0.142755624	Dlat
4299	ENSMUSG00000088252	22.82683859	0.92992944	0.642031291	1.448417628	0.147500288	Snord13
2886	ENSMUSG00000039543	16.75757642	0.634906627	0.438900027	1.446585983	0.148012914	Cfap70
2940	ENSMUSG00000040140	43.15899603	-0.382253029	0.264521586	-1.445073101	0.148437353	Tdrd6
2013	ENSMUSG00000030374	29.83555562	0.393461431	0.273091668	1.440766882	0.149650553	Strn4
4120	ENSMUSG00000073430	52.39072413	1.000473282	0.695195121	1.439125868	0.150114864	Gm10505
3337	ENSMUSG00000047712	9.293276249	0.63400064	0.440617151	1.438892331	0.150181031	Ust
4166	ENSMUSG00000074849	9.047109271	0.796048207	0.553830927	1.437348781	0.150618915	Spata31d1c
2666	ENSMUSG00000037275	14.10066066	0.567666369	0.395811397	1.434183992	0.151519764	Gemin5
3579	ENSMUSG00000053914	29.290855	-0.392594835	0.274742946	-1.428953288	0.15301766	Kdm4d
4115	ENSMUSG00000073079	9.395219213	-0.738697077	0.517676754	-1.426946585	0.153595292	Srp54a
3521	ENSMUSG00000052273	11.61450013	0.744327799	0.521911207	1.426157917	0.153822764	Dnah3
1168	ENSMUSG00000024359	28.43275211	-0.417805011	0.293359219	-1.424209582	0.154385812	Hspa9
2002	ENSMUSG00000030287	9.015566419	0.746106752	0.52397463	1.423936788	0.154464771	Itpr2
1296	ENSMUSG00000025193	17.97946231	-0.627655654	0.441701273	-1.420995801	0.15531798	Cutc
2924	ENSMUSG00000039958	9.228000024	-0.667212526	0.470046537	-1.41946057	0.155764784	Etfbkmt
669	ENSMUSG00000020471	12.47414964	0.55366585	0.39069769	1.417120868	0.156447592	Pold2
1306	ENSMUSG00000025278	12.51938931	0.670096583	0.474309067	1.41278468	0.157719044	Flnb
2207	ENSMUSG00000031955	21.39948415	0.513041005	0.363953265	1.409634298	0.158647694	Bcar1
1798	ENSMUSG00000028917	31.55550791	-0.489719097	0.347610742	-1.408814622	0.15888999	Plekhm2
3932	ENSMUSG00000065845	44.64172596	-0.909305941	0.645543927	-1.408588794	0.158956794	Gm25189
3592	ENSMUSG00000054387	11.3891142	0.620125482	0.441304174	1.405211006	0.159958542	Mdm4
1150	ENSMUSG00000024242	16.48962802	0.504706857	0.359333096	1.404565463	0.160150533	Map4k3
3501	ENSMUSG00000051695	39.04027686	-0.571361467	0.408215473	-1.399656568	0.161616186	Pcbp1
882	ENSMUSG00000021879	11.21322659	-0.597442804	0.42690948	-1.399460148	0.161675041	Dnah12
2196	ENSMUSG00000031878	15.96495553	-0.635774716	0.454536702	-1.398731309	0.161893572	Nae1
3129	ENSMUSG00000042700	15.73563733	0.561836124	0.4025287	1.395766624	0.162784784	Sipa1l1
150	ENSMUSG00000003528	9.066495092	0.68567266	0.493048188	1.390680821	0.164322236	Slc25a1
2304	ENSMUSG00000032570	9.933926517	0.905177737	0.651529293	1.389312416	0.16473777	Atp2c1
2664	ENSMUSG00000037266	18.12781964	-0.787490669	0.566939092	-1.389021642	0.164826169	Rsrp1
3800	ENSMUSG00000060981	188.4077859	0.891603559	0.642182574	1.388395754	0.165016568	H4c8
4560	ENSMUSG00000118866	17.1674133	-0.953132506	0.686867228	-1.387651743	0.165243117	Rn7s1
1712	ENSMUSG00000028458	10.76174822	0.672608392	0.484846633	1.387260106	0.165362463	Tesk1
1702	ENSMUSG00000028419	13.64811583	0.683287	0.492850551	1.386397964	0.165625418	Chmp5
746	ENSMUSG00000020893	60.95793069	-0.43112111	0.311284383	-1.384975072	0.16606009	Per1
3306	ENSMUSG00000047143	11.86161862	0.644656222	0.466877948	1.380781047	0.167346293	Dmrta2
4383	ENSMUSG00000096045	12.89679383	0.619563057	0.449195012	1.379274126	0.167810251	Gm21698
1226	ENSMUSG00000024740	45.07761274	-0.380106199	0.27604909	-1.376951466	0.168527254	Ddb1
538	ENSMUSG00000019261	10.24739645	-0.681791872	0.495849842	-1.374996651	0.169132483	Map1s
2583	ENSMUSG00000036403	10.93056817	0.585028875	0.425500319	1.374919945	0.169156265	Cep135
1949	ENSMUSG00000029775	12.99967363	0.561827008	0.408755877	1.374480563	0.16929254	Klhdc10
1205	ENSMUSG00000024542	10.49161044	-0.709383838	0.516458125	-1.373555382	0.169579757	Cep192
705	ENSMUSG00000020664	15.81054122	-0.63891391	0.468153739	-1.364752338	0.172330904	Dld
3255	ENSMUSG00000045969	10.50206098	-0.555720466	0.40955383	-1.356892368	0.174815412	Ing1
4359	ENSMUSG00000094845	11.49837333	0.575831233	0.424602666	1.356164901	0.175046707	Tmem95
2715	ENSMUSG00000037827	9.497805751	0.677425818	0.49983336	1.355303331	0.175320934	Gm5884
2264	ENSMUSG00000032328	11.24547879	0.719050418	0.530726504	1.354841737	0.175467986	Tmem30a
1327	ENSMUSG00000025480	26.37308935	-0.557564322	0.411942106	-1.353501654	0.175895422	Syce1
4557	ENSMUSG00000118841	17.33855548	-0.953961045	0.70566021	-1.35187025	0.176416826	Rn7s2
2261	ENSMUSG00000032316	17.42870653	0.699920385	0.520020481	1.345947727	0.178319375	Clk3
1873	ENSMUSG00000029265	24.07838643	0.532511824	0.396226957	1.343956576	0.178962429	Dr1
960	ENSMUSG00000022364	17.97466703	-0.448321612	0.333812795	-1.343033039	0.179261276	Tbc1d31
924	ENSMUSG00000022109	11.73270182	-0.798894237	0.595401764	-1.34177338	0.179669486	Med4
135	ENSMUSG00000003235	17.46906759	-0.506423735	0.377576944	-1.341246446	0.179840451	Eif2b5
1007	ENSMUSG00000022603	45.81157674	0.409729348	0.307056607	1.334377241	0.182080255	Mroh4
1619	ENSMUSG00000027742	137.6817682	-0.439280045	0.329496672	-1.333185075	0.182471076	Cog6
1048	ENSMUSG00000022864	11.69255083	-0.547865182	0.410969117	-1.333105481	0.182497191	D16Ertd472e
855	ENSMUSG00000021690	18.74284017	0.440371632	0.330878144	1.330917865	0.183216038	Jmy
478	ENSMUSG00000017778	27.47373796	0.376812783	0.283484186	1.329219767	0.183775475	Cox7c
455	ENSMUSG00000016664	26.01964412	0.591208323	0.44500794	1.328534324	0.184001652	Pacsin2
2266	ENSMUSG00000032336	10.21154055	-0.562001202	0.423715206	-1.326365432	0.184718683	Nptn
2958	ENSMUSG00000040389	13.67985554	-0.595695113	0.449247648	-1.325983823	0.184845056	Wdr47
3542	ENSMUSG00000052798	13.91061001	-0.585226531	0.441371066	-1.325928627	0.18486334	Nup107
1273	ENSMUSG00000025026	26.63900123	-0.525572823	0.396534768	-1.325414227	0.185033801	Add3
3370	ENSMUSG00000048520	18.73978934	0.726751559	0.548846542	1.324143458	0.185455405	Fbxl13
3779	ENSMUSG00000060147	14.73079889	0.548305793	0.414283849	1.323502701	0.185668259	Serpinb6a
4266	ENSMUSG00000084786	14.83424791	0.450321858	0.340431634	1.322796745	0.18590298	Ubl5
2532	ENSMUSG00000035765	15.37961219	0.507116809	0.383430774	1.322577224	0.185976013	Dym
1297	ENSMUSG00000025199	13.99179948	-0.661685723	0.501605936	-1.319134555	0.187124133	Chuk
1462	ENSMUSG00000026679	14.33241517	0.497130891	0.376935353	1.318875739	0.187210658	Enkur
271	ENSMUSG00000006784	15.81096895	-0.54487793	0.413474922	-1.317801638	0.187570059	Odad4
2952	ENSMUSG00000040297	49.92794078	-0.401837671	0.305755659	-1.314244427	0.188763962	Suco
2743	ENSMUSG00000038025	10.86895195	-0.574175859	0.437298483	-1.313006748	0.189180674	Phf2
795	ENSMUSG00000021188	12.27302441	-0.674314364	0.51369727	-1.312668772	0.189294585	Trip11
4246	ENSMUSG00000081087	15.02502431	-0.690809078	0.52636772	-1.312407755	0.189382592	Rps15a-ps7
3304	ENSMUSG00000047129	41.13040085	0.37035512	0.282467525	1.3111423	0.189809692	1700113H08Rik
641	ENSMUSG00000020305	10.91750205	-0.518702262	0.395893325	-1.310207143	0.19012577	Asb3
3462	ENSMUSG00000050844	19.35956331	0.407446453	0.311320048	1.308770368	0.190612147	1700020N01Rik
4377	ENSMUSG00000095677	74.21447014	-0.297041964	0.227351662	-1.306530865	0.19137209	Dynlt1f
3546	ENSMUSG00000052962	14.20073625	-0.496529934	0.380339337	-1.305491925	0.191725395	Mrpl35
2446	ENSMUSG00000034377	15.46000539	0.629245277	0.482363561	1.30450417	0.192061739	Tulp4
2961	ENSMUSG00000040414	15.89604078	-0.568172784	0.437506057	-1.298662672	0.19405972	Slc25a28
3258	ENSMUSG00000046034	10.36999991	0.702160533	0.540932203	1.298056447	0.194267939	Otulin
1788	ENSMUSG00000028851	21.04222645	-0.926390845	0.713710537	-1.29799239	0.19428995	Nudc
2322	ENSMUSG00000032777	67.50286682	-0.468953014	0.361368877	-1.297712792	0.194386046	Gtf3c1
3981	ENSMUSG00000068039	17.41547497	0.595498135	0.458883314	1.297711461	0.194386504	Tcp1
2231	ENSMUSG00000032110	26.76023243	0.530241936	0.408780997	1.297129611	0.194586595	Acrv1
2362	ENSMUSG00000033323	21.71388859	-0.401832821	0.310117474	-1.295743887	0.195063736	Ctdp1
2622	ENSMUSG00000036835	15.62771362	0.476938019	0.369016476	1.292457249	0.196198842	Psenen
3709	ENSMUSG00000058258	9.683935097	-0.637982948	0.495784805	-1.286814242	0.198159042	Idi1
1646	ENSMUSG00000027973	10.45066192	0.818823268	0.637226786	1.28497936	0.198799497	1700006A11Rik
2833	ENSMUSG00000038954	9.711512088	0.621170824	0.484568624	1.281904757	0.199876059	Supt3
2721	ENSMUSG00000037904	23.65788723	0.53355348	0.41640156	1.281343614	0.200073	Ankrd9
237	ENSMUSG00000005899	17.97070462	0.446991425	0.349169136	1.280157319	0.200489813	Smpd4
2486	ENSMUSG00000035021	31.71072306	0.335858348	0.262611036	1.278919398	0.200925441	Baz1a
4555	ENSMUSG00000118837	175.8022779	-0.913406715	0.715225617	-1.277088926	0.201570854	Rnu2-10
3694	ENSMUSG00000057691	11.11691782	-0.513982775	0.40265888	-1.276471974	0.201788728	Zfp746
2254	ENSMUSG00000032281	17.61145443	-0.878813749	0.688681488	-1.276081563	0.201926688	Acsbg1
2339	ENSMUSG00000033020	10.38750452	-0.766662804	0.602028047	-1.273466923	0.202852403	Polr2f
890	ENSMUSG00000021930	10.65456229	-0.550399982	0.432481147	-1.272656589	0.203139929	Spryd7
3346	ENSMUSG00000047888	9.822167606	0.54829924	0.431119246	1.271804135	0.203442719	Tnrc6b
1051	ENSMUSG00000022884	28.75377773	0.443053601	0.348401755	1.271674426	0.203488821	Eif4a2
2652	ENSMUSG00000037119	17.52512181	0.511424659	0.403032441	1.268941672	0.204461868	Fam91a1
3311	ENSMUSG00000047227	11.36155009	0.540306301	0.42657752	1.266607536	0.205295656	Gm527
1976	ENSMUSG00000030074	13.01446443	0.50184787	0.396244836	1.266509552	0.205330712	Gxylt2
2930	ENSMUSG00000040010	17.06816525	-0.761805253	0.601835213	-1.265803722	0.205583362	Slc7a5
3086	ENSMUSG00000041961	13.9876332	0.738588394	0.584544641	1.263527783	0.206399568	Znrf3
1997	ENSMUSG00000030254	12.02499938	-0.551983211	0.43733624	-1.262148344	0.206895412	Rad18
4183	ENSMUSG00000075701	9.635083798	-0.576060728	0.456740878	-1.261241888	0.207221711	Selenos
1210	ENSMUSG00000024598	12.93544204	-0.574232011	0.455550363	-1.260523661	0.207480518	Fbn2
690	ENSMUSG00000020590	9.338565882	0.594914736	0.472146284	1.260022065	0.207661402	Snx13
1021	ENSMUSG00000022687	14.92779348	-0.503303278	0.400125633	-1.257863122	0.208441263	Boc
2888	ENSMUSG00000039577	11.13072161	0.517461525	0.411785224	1.256629659	0.20888777	Nphp4
1748	ENSMUSG00000028649	10.08589553	0.532690162	0.425317458	1.252453084	0.210404814	Macf1
3404	ENSMUSG00000049562	13.72389125	-0.487650515	0.38970055	-1.251346748	0.210807997	Ap5b1
4435	ENSMUSG00000101009	9.410484173	0.906636646	0.725115651	1.250333853	0.211177617	1700108F19Rik
167	ENSMUSG00000004100	17.93393749	-0.737789556	0.590320139	-1.249812615	0.211368007	Ppan
1342	ENSMUSG00000025609	12.7446146	-0.60336644	0.482900571	-1.249463091	0.211495745	Mkln1
3243	ENSMUSG00000045662	11.74362194	-0.567444405	0.454452229	-1.248633779	0.211799051	Henmt1
4339	ENSMUSG00000092341	12.98778499	-0.781139206	0.626596168	-1.246638978	0.212529903	Malat1
1472	ENSMUSG00000026755	11.99114993	-0.599719996	0.481415796	-1.245742249	0.212859038	Arpc5l
2490	ENSMUSG00000035078	14.31207763	-0.571513238	0.458818801	-1.245618612	0.212904446	Mtmr9
3314	ENSMUSG00000047260	14.38225417	-0.521809605	0.41898153	-1.245423884	0.212975978	Emc6
3801	ENSMUSG00000060985	13.20323478	-0.560844327	0.450478739	-1.244996219	0.21313314	Tdrd5
3577	ENSMUSG00000053898	10.18441118	-0.591104279	0.47519987	-1.243906652	0.213533921	Ech1
2747	ENSMUSG00000038095	36.016053	-0.554437993	0.445875315	-1.243482145	0.213690216	Sbno1
4553	ENSMUSG00000118718	174.2017932	-0.785295106	0.632234614	-1.242094452	0.214201715	Gm24950
2109	ENSMUSG00000031353	35.79082539	-0.864603646	0.696112614	-1.242045653	0.214219719	Rbbp7
1635	ENSMUSG00000027875	19.02763164	-1.151961558	0.928611045	-1.24052106	0.214782729	Hmgcs2
349	ENSMUSG00000010517	31.07846646	-0.380853233	0.30766201	-1.237894903	0.215755033	Faf1
3869	ENSMUSG00000062991	14.7600439	0.478273	0.38654268	1.23730968	0.215972135	Nrg1
819	ENSMUSG00000021392	43.74486606	-0.492673208	0.398257734	-1.237071289	0.216060618	Nol8
3581	ENSMUSG00000054079	12.33906465	-0.49208048	0.397935787	-1.236582627	0.216242073	Utp18
2738	ENSMUSG00000038007	9.327520597	0.937259384	0.758599645	1.235512552	0.216639808	Acer2
91	ENSMUSG00000002308	28.51206677	0.410918498	0.333184037	1.233307878	0.21746092	Cd320
754	ENSMUSG00000020917	12.56530286	-0.865073586	0.702491087	-1.231437099	0.218159429	Acly
1144	ENSMUSG00000024217	19.09190976	-0.467771146	0.380631883	-1.228933167	0.219096865	Snrpc
827	ENSMUSG00000021484	13.50872829	-0.558983848	0.455226603	-1.227924387	0.219475354	Lman2
2004	ENSMUSG00000030298	11.80418635	-0.566340984	0.462309001	-1.225026947	0.220565068	Sec13
3307	ENSMUSG00000047187	19.16888979	-0.464985424	0.380565803	-1.221826607	0.221773205	Rab2a
3302	ENSMUSG00000047115	9.299702413	-0.547432054	0.44843221	-1.220768807	0.222173567	Fam221a
4137	ENSMUSG00000073940	42.80361553	-0.531189456	0.435981145	-1.218377129	0.223080692	Hbb-bt
1863	ENSMUSG00000029192	27.7700766	-0.377157846	0.310172409	-1.215961945	0.223999419	Tbc1d14
3815	ENSMUSG00000061306	11.34243869	-0.561749607	0.462318933	-1.215069439	0.224339608	Slc38a10
3849	ENSMUSG00000062202	9.959399696	0.77558626	0.638545244	1.214614417	0.224513188	Btbd9
1152	ENSMUSG00000024253	13.40842268	0.495310402	0.407928488	1.214208903	0.224667962	Dync2li1
3388	ENSMUSG00000048930	62.30574393	-0.487333914	0.401470831	-1.213871286	0.224796879	Tada3
3946	ENSMUSG00000066441	43.85708518	-0.329793119	0.271740638	-1.213631945	0.224888303	Rdh11
4222	ENSMUSG00000079386	12.25216404	-0.715323753	0.589559487	-1.213319043	0.225007865	Gm3173
2217	ENSMUSG00000032002	11.31935002	-0.481520705	0.39739516	-1.211692423	0.225630141	Dcun1d5
730	ENSMUSG00000020794	21.96397344	0.512928791	0.423433288	1.211356795	0.22575869	Ube2g1
4420	ENSMUSG00000099988	9.832455611	0.699954722	0.57934644	1.208179898	0.226978072	1700054A03Rik
2363	ENSMUSG00000033335	22.15309511	0.541303835	0.448243091	1.207612222	0.227196456	Dnm2
923	ENSMUSG00000022108	46.34582629	-0.608433727	0.504368317	-1.206328205	0.227690967	Itm2b
3509	ENSMUSG00000051864	18.08187326	0.465259677	0.386562515	1.203581979	0.228751188	Tbc1d22a
4434	ENSMUSG00000100954	9.580585406	0.782709512	0.650881443	1.202537761	0.229155245	Gm10138
2068	ENSMUSG00000030788	17.0405754	0.524091591	0.436339132	1.201110679	0.229708271	Rnf141
2954	ENSMUSG00000040340	12.32047696	0.859844618	0.716411769	1.200210069	0.230057766	Tex45
3648	ENSMUSG00000056367	14.44816095	0.461653865	0.384907946	1.199387725	0.230377218	Actr3b
4523	ENSMUSG00000115118	15.86148586	0.700396759	0.58567617	1.195877168	0.231744496	Gm36617
385	ENSMUSG00000014075	48.32888838	-0.409973399	0.342828646	-1.195855141	0.231753093	Dynlt2b
1773	ENSMUSG00000028784	14.40605585	-0.533984921	0.446655863	-1.195517547	0.231884885	Spocd1
3763	ENSMUSG00000059743	27.12037559	-0.355045725	0.297161525	-1.194790361	0.232168947	Fdps
2177	ENSMUSG00000031792	14.31519477	-0.662460348	0.554580892	-1.194524295	0.232272943	Usb1
1382	ENSMUSG00000026021	24.14858039	-0.473658413	0.396627473	-1.194214837	0.232393941	Sumo1
377	ENSMUSG00000013584	12.09455264	-0.580524822	0.486149814	-1.194127417	0.23242813	Aldh1a2
1928	ENSMUSG00000029648	12.52341887	0.531578575	0.445545145	1.193096997	0.232831388	Flt1
955	ENSMUSG00000022332	13.3759494	-0.604815818	0.508152061	-1.190226047	0.233957558	Khdrbs3
2746	ENSMUSG00000038069	12.09340268	0.485198586	0.407664648	1.190190489	0.23397153	Cdkn2aip
1310	ENSMUSG00000025324	18.47766289	0.526106501	0.442139561	1.189910489	0.234081576	Atp10a
134	ENSMUSG00000003234	18.95095068	0.493754905	0.415228887	1.189115019	0.234394409	Abcf3
1639	ENSMUSG00000027893	12.04505077	-0.622710788	0.524414686	-1.187439644	0.235054251	Ahcyl1
2739	ENSMUSG00000038010	11.95141631	0.520763573	0.43890854	1.18649679	0.235426168	Ccdc138
1530	ENSMUSG00000027099	25.17155493	-0.547614121	0.461934677	-1.185479568	0.235827889	Mtx2
471	ENSMUSG00000017493	15.22985291	-0.95478628	0.805782221	-1.184918524	0.236049663	Igfbp4
2204	ENSMUSG00000031935	12.75496173	-0.676387304	0.570922713	-1.184726564	0.236125576	Med17
2931	ENSMUSG00000040013	8.999395329	0.583754633	0.492801894	1.184562477	0.23619048	Fkbp6
3421	ENSMUSG00000049878	12.57515612	-0.470788365	0.397592183	-1.184098644	0.236374017	Rlf
2368	ENSMUSG00000033417	16.28133301	0.478232866	0.404210617	1.18312792	0.236758454	Cacul1
1104	ENSMUSG00000023938	19.03482968	0.753578918	0.637015432	1.18298377	0.23681558	Aars2
4462	ENSMUSG00000102805	30.45015095	0.473347715	0.400161785	1.182890851	0.236852408	Gm37240
1966	ENSMUSG00000029992	13.44410306	-0.461679243	0.391416622	-1.179508528	0.238195743	Gfpt1
4223	ENSMUSG00000079389	10.3844233	-0.548022027	0.464771801	-1.179120647	0.238350138	Gm3149
3213	ENSMUSG00000045010	11.13452754	-0.646775052	0.548795989	-1.178534583	0.238583554	Gm4779
4317	ENSMUSG00000090841	16.66576834	-0.53001991	0.449811823	-1.17831476	0.238671146	Myl6
3999	ENSMUSG00000068740	11.20807389	-0.823080891	0.699120236	-1.177309495	0.239071999	Celsr2
1920	ENSMUSG00000029578	14.80496309	0.504138671	0.428663233	1.17607164	0.23956625	Wipi2
287	ENSMUSG00000007659	11.62666352	-0.525916011	0.447621853	-1.174911385	0.24003017	Bcl2l1
2615	ENSMUSG00000036800	12.62542829	0.553832915	0.471728941	1.174049048	0.24037538	Fam135b
4284	ENSMUSG00000086788	52.03039069	0.429415246	0.365798682	1.173911407	0.240430513	1700029M20Rik
1035	ENSMUSG00000022787	16.60228838	-0.5808158	0.495415967	-1.172380057	0.241044503	Wdr53
961	ENSMUSG00000022365	11.15786135	-0.459890808	0.392517259	-1.171644807	0.241339691	Derl1
1377	ENSMUSG00000025986	13.37638268	-0.426476792	0.364882894	-1.168804563	0.242482382	Slc39a10
627	ENSMUSG00000020231	8.308493938	-0.700748356	0.600022078	-1.167870952	0.242858823	Dip2a
2360	ENSMUSG00000033307	36.10462101	0.340723131	0.291783453	1.167726022	0.242917297	Mif
353	ENSMUSG00000010663	13.01264036	-1.025864635	0.879108561	-1.166937374	0.243235661	Fads1
2056	ENSMUSG00000030718	17.91489921	-0.388053614	0.332886166	-1.165724665	0.243725784	Ppme1
2115	ENSMUSG00000031458	19.97873525	-0.414094074	0.355300681	-1.165475036	0.243826759	Coprs
1056	ENSMUSG00000022911	21.68534025	-0.463322439	0.398485638	-1.162707998	0.244947996	Arl13b
2175	ENSMUSG00000031786	15.13294795	-0.431935517	0.372342845	-1.16004785	0.246029325	Drc7
2311	ENSMUSG00000032611	38.60348276	-0.439249579	0.378856725	-1.159408159	0.246289853	1700102P08Rik
4390	ENSMUSG00000096472	46.57364483	-0.414907856	0.358067735	-1.158741254	0.24656167	Cdkn2d
3343	ENSMUSG00000047824	9.684187406	-0.524648878	0.452908032	-1.158400474	0.246700646	Pygo2
1094	ENSMUSG00000023826	16.64821194	0.555756569	0.47980324	1.158300993	0.246741226	Prkn
1551	ENSMUSG00000027309	26.84039104	0.522939034	0.451725379	1.157648117	0.247007665	Dnaaf9
4105	ENSMUSG00000072720	12.03109221	0.748690216	0.647064684	1.157056218	0.247249393	Myo18b
1476	ENSMUSG00000026775	18.43543454	-0.389585763	0.33676418	-1.156850363	0.247333501	Yme1l1
2879	ENSMUSG00000039463	9.383344979	0.506160891	0.437695812	1.156421601	0.24750875	Slc9a8
920	ENSMUSG00000022089	9.632234143	-0.618941819	0.535414819	-1.156004275	0.247679408	Bin3
2286	ENSMUSG00000032475	17.1564078	-0.507140903	0.438927928	-1.155408144	0.247923329	Nck1
2912	ENSMUSG00000039804	52.43364756	-0.391104885	0.339072211	-1.153456025	0.248723257	Ncoa5
43	ENSMUSG00000001156	20.71136469	0.674088524	0.585376811	1.151546339	0.249507543	Mxd1
2876	ENSMUSG00000039419	48.73928168	0.508580095	0.442127628	1.150301548	0.250019693	Cntnap2
4566	ENSMUSG00000119206	2015.284461	-0.750108617	0.652538719	-1.149523539	0.250340166	Gm22317
3269	ENSMUSG00000046341	31.01756689	-0.374002689	0.325362958	-1.149493755	0.25035244	Gm11223
2070	ENSMUSG00000030795	18.96442602	-0.634439704	0.552512374	-1.148281439	0.250852399	Fus
3585	ENSMUSG00000054277	51.72559895	-0.315180204	0.274604186	-1.147761833	0.251066897	Arfgap3
3875	ENSMUSG00000063145	30.24675934	0.322197834	0.280852729	1.147212759	0.251293699	Bbs5
2406	ENSMUSG00000033987	20.05621557	0.613257318	0.537195011	1.14159161	0.253623813	Dnah17
335	ENSMUSG00000009739	11.44325203	0.480268738	0.421563119	1.139257009	0.254595974	Pou6f1
2491	ENSMUSG00000035095	11.22457022	0.650691962	0.571207703	1.139151238	0.25464008	Fam167a
561	ENSMUSG00000019863	9.881944755	0.506120381	0.444363408	1.138978529	0.25471211	Qrsl1
285	ENSMUSG00000007613	14.72407986	0.521211357	0.457658006	1.138866467	0.254758854	Tgfbr1
2233	ENSMUSG00000032127	9.167138511	-0.565167633	0.496569637	-1.138143759	0.255060459	Vps11
1385	ENSMUSG00000026087	14.25074076	0.440595738	0.387285707	1.137650398	0.255266493	Mrpl30
3362	ENSMUSG00000048312	19.69570026	0.627058799	0.551293268	1.137432355	0.255357588	Gm4884
2694	ENSMUSG00000037573	18.2219509	0.40968166	0.360329305	1.13696459	0.255553089	Tob1
1248	ENSMUSG00000024878	17.3288385	-0.611671675	0.538680917	-1.135499061	0.256166275	Cbwd1
1124	ENSMUSG00000024083	10.0804813	-0.582166296	0.513476387	-1.133774231	0.256889263	Pja2
3740	ENSMUSG00000059208	15.39957553	-0.731599783	0.64648616	-1.131655755	0.25777919	Hnrnpm
3603	ENSMUSG00000054823	11.7526652	0.484561975	0.428344486	1.131243638	0.257952559	Nsd3
1237	ENSMUSG00000024815	10.10114639	0.464819399	0.411111757	1.130640005	0.258206642	Trpd52l3
2556	ENSMUSG00000036167	22.21337869	0.461686012	0.408373328	1.130548888	0.258245011	Pphln1
2828	ENSMUSG00000038909	37.58142237	-0.361717968	0.320025079	-1.130280067	0.258358231	Kat7
3512	ENSMUSG00000051934	27.55419677	-0.489316879	0.433116689	-1.129757617	0.258578371	Spats2
2232	ENSMUSG00000032115	19.49221368	0.538337923	0.476608273	1.129518629	0.258679115	Hyou1
4559	ENSMUSG00000118864	2027.382303	-0.738104843	0.653893144	-1.128785109	0.258988496	Gm25679
3323	ENSMUSG00000047423	23.1428493	-0.471979696	0.418281927	-1.128376976	0.259160747	AI837181
626	ENSMUSG00000020225	12.0960939	-0.465759723	0.412882624	-1.128068115	0.259291154	Tmbim4
3376	ENSMUSG00000048647	9.970453395	-0.593064317	0.525833251	-1.127856247	0.259380634	Exd1
1054	ENSMUSG00000022892	11.54642298	0.458829684	0.407071797	1.127146825	0.259680408	App
3028	ENSMUSG00000041068	15.38915911	-0.420336504	0.373029733	-1.126817694	0.259819568	4930596D02Rik
409	ENSMUSG00000015053	10.41564178	0.452223352	0.401611535	1.126021823	0.260156282	Gata2
1340	ENSMUSG00000025583	13.81357274	0.489506899	0.434978681	1.125358367	0.260437206	Rptor
2141	ENSMUSG00000031585	38.08373833	-0.321595626	0.285832281	-1.125120035	0.260538173	Gtf2e2
807	ENSMUSG00000021264	21.08363719	-0.645994394	0.574550483	-1.124347492	0.260865638	Yy1
2515	ENSMUSG00000035473	8.870112832	0.558538015	0.496786748	1.124301358	0.260885203	Galm
3058	ENSMUSG00000041560	23.72848588	-0.495256064	0.440839173	-1.123439328	0.261250955	Nop53
4191	ENSMUSG00000078249	13.87517069	0.649810608	0.578811974	1.122662689	0.26158078	Hmga1b
3456	ENSMUSG00000050705	10.14351402	0.65539032	0.584050471	1.122146721	0.261800062	2310061I04Rik
853	ENSMUSG00000021686	17.62760167	-0.447005103	0.398875801	-1.120662377	0.262431602	Ap3b1
1447	ENSMUSG00000026571	30.07103858	0.481691872	0.429932927	1.120388417	0.262548279	Dcaf6
1675	ENSMUSG00000028264	14.22557775	-0.450395222	0.402069236	-1.120193197	0.262631442	Spaca1
852	ENSMUSG00000021671	58.6849918	-0.359619685	0.321045866	-1.120150493	0.262649637	Poc5
3526	ENSMUSG00000052363	24.18591085	0.548394904	0.489733404	1.119782517	0.262806451	Zdhhc19
347	ENSMUSG00000010406	13.15585801	-0.563144213	0.50341771	-1.118642038	0.263292882	Mrpl52
839	ENSMUSG00000021589	11.65076203	0.535164571	0.478507701	1.118403256	0.263394805	Rhobtb3
4148	ENSMUSG00000074305	15.582565	0.731278079	0.654104925	1.117982835	0.263574324	Peak1
4327	ENSMUSG00000091476	14.30062602	0.477357008	0.427053509	1.117792027	0.263655827	Catspere2
3553	ENSMUSG00000053111	11.24541819	0.455756646	0.407784635	1.117640555	0.263720541	Fank1
1117	ENSMUSG00000024056	22.47412173	-0.593446191	0.531648849	-1.116237142	0.26432064	Ndc80
2197	ENSMUSG00000031893	21.28999332	0.640518396	0.573879641	1.116119741	0.264370883	Tsnaxip1
2240	ENSMUSG00000032212	21.0955508	0.391141259	0.350708632	1.11528837	0.264726867	Sltm
1139	ENSMUSG00000024182	15.11238024	-0.451875746	0.405769319	-1.113627189	0.265439157	Axin1
3847	ENSMUSG00000062078	15.99731287	-0.44147214	0.396496162	-1.113433578	0.265522261	Qki
196	ENSMUSG00000004994	13.67867037	-0.415580217	0.373822645	-1.111704235	0.266265338	Ccdc130
2290	ENSMUSG00000032481	13.12220193	0.422766523	0.380309526	1.111638004	0.266293825	Smarcc1
2837	ENSMUSG00000038976	27.46281332	-0.557346893	0.501881159	-1.110515673	0.266776878	Ppp1r9b
591	ENSMUSG00000020038	11.11517033	0.61117246	0.551318231	1.108565663	0.267617598	Cry1
2221	ENSMUSG00000032030	17.40086515	0.412944207	0.372504627	1.108561283	0.267619488	Cul5
3211	ENSMUSG00000044948	26.25313703	0.44761762	0.40378885	1.108543785	0.267627041	Cfap43
1489	ENSMUSG00000026853	50.26159161	0.329592308	0.297627918	1.107397147	0.268122259	Crat
4041	ENSMUSG00000069972	122.8732282	-0.302225593	0.273021662	-1.10696562	0.268308793	Rps13-ps2
4056	ENSMUSG00000070489	18.46498559	-0.415559232	0.376518604	-1.103688444	0.26972831	4930527J03Rik
3966	ENSMUSG00000067367	79.23000277	-0.3573918	0.32383968	-1.10360719	0.269763571	Lyar
2720	ENSMUSG00000037894	48.51809318	-0.288045914	0.261060143	-1.103369938	0.269866546	H2az1
3823	ENSMUSG00000061518	35.47695358	-0.445244215	0.403587471	-1.103216147	0.269933311	Cox5b
4539	ENSMUSG00000116879	15.77112257	0.717926186	0.651222723	1.102428034	0.27027563	Gm49794
1290	ENSMUSG00000025153	18.50812176	0.386240514	0.350565191	1.101765162	0.27056378	Fasn
2288	ENSMUSG00000032479	30.24022757	-0.34423143	0.312657347	-1.10098622	0.270902655	Map4
3741	ENSMUSG00000059248	13.17089122	0.574013249	0.521789661	1.100085516	0.271294864	Septin9
2024	ENSMUSG00000030463	12.13807973	-0.533507223	0.485168005	-1.099633978	0.271491632	4933421I07Rik
284	ENSMUSG00000007591	21.49038314	0.55389977	0.504115607	1.098755448	0.27187475	Tssk4
3135	ENSMUSG00000042744	17.80164677	0.472216914	0.429870637	1.09850935	0.271982137	Hectd4
2564	ENSMUSG00000036218	8.659171159	0.596931976	0.54438413	1.096527147	0.27284815	Pdzrn4
579	ENSMUSG00000019977	25.07767476	0.457319779	0.417424454	1.09557496	0.273264825	Hbs1l
169	ENSMUSG00000004207	13.05493708	0.58541424	0.535033727	1.094163246	0.273883388	Psap
95	ENSMUSG00000002372	28.30558262	-0.316094743	0.288916675	-1.094068879	0.27392477	Ranbp3
3621	ENSMUSG00000055403	12.81645125	0.630445749	0.577015389	1.092597808	0.274570426	4933427D06Rik
3565	ENSMUSG00000053510	15.25942484	0.633789536	0.580644983	1.091526758	0.275041164	Nrd1
171	ENSMUSG00000004319	18.63213011	0.376108411	0.344921741	1.090416655	0.275529649	Clcn3
2820	ENSMUSG00000038806	16.33015392	-0.564091512	0.51757367	-1.089876755	0.275767438	Sde2
1936	ENSMUSG00000029682	20.61292358	0.444792248	0.408932944	1.087689935	0.276732013	Spam1
1398	ENSMUSG00000026171	49.36525088	-0.323525565	0.297927675	-1.085919811	0.277514471	Rnf25
1935	ENSMUSG00000029681	8.250059974	-0.552123728	0.509049255	-1.084617494	0.278091103	Bcl7b
4570	ENSMUSG00000119670	2166.767259	-0.717219792	0.661621262	-1.084033773	0.278349825	Gm24305
2661	ENSMUSG00000037235	29.91877487	0.402387608	0.371279847	1.083785211	0.278460044	Mxd4
3554	ENSMUSG00000053153	34.39642554	-0.317522404	0.293638656	-1.081337205	0.279547143	Spag16
121	ENSMUSG00000002981	18.63929843	-0.46149619	0.427006577	-1.080770682	0.279799133	Clptm1
2010	ENSMUSG00000030345	10.57232265	0.448967894	0.415494459	1.08056289	0.279891597	Dyrk4
2312	ENSMUSG00000032612	22.7956163	0.358342918	0.331646727	1.080495869	0.279921426	Usp4
4531	ENSMUSG00000115774	9.596583536	0.576785636	0.533931092	1.080262312	0.280025387	4933431J24Rik
4357	ENSMUSG00000094421	10.29486826	0.687529258	0.636481904	1.080202366	0.280052075	Gm20778
2988	ENSMUSG00000040688	12.69953804	0.655586827	0.60748036	1.079190159	0.280502966	Tbl3
4077	ENSMUSG00000071103	11.28028139	0.453046921	0.419979993	1.078734531	0.280706088	1700029J07Rik
2244	ENSMUSG00000032232	12.14939958	0.545029728	0.505337659	1.078545639	0.280790326	Cgnl1
4340	ENSMUSG00000092508	18.37543337	0.881081339	0.81692607	1.078532528	0.280796174	H2-M10.5-ps1
3925	ENSMUSG00000064360	168.0589734	0.533488319	0.494744435	1.078310902	0.280895033	mt-Nd3
1071	ENSMUSG00000023046	12.72251297	-0.830078093	0.770115905	-1.077861251	0.28109568	Igfbp6
3524	ENSMUSG00000052305	176.0886376	-0.547042452	0.507994917	-1.076865994	0.281540137	Hbb-bs
331	ENSMUSG00000009621	10.43058088	0.535035951	0.497121527	1.076267919	0.281807452	Vav2
142	ENSMUSG00000003378	10.80559722	0.502111922	0.46688657	1.075447345	0.282174495	Grik5
926	ENSMUSG00000022111	16.55290081	-0.42257481	0.393515088	-1.073846524	0.282891474	Uchl3
35	ENSMUSG00000001039	17.4920923	0.369244854	0.345050422	1.07011854	0.284565955	B9d1
4187	ENSMUSG00000077450	40.7361013	0.323367167	0.302767211	1.068038926	0.285502953	Rab11b
450	ENSMUSG00000016541	29.8735822	0.316912653	0.296943424	1.067249271	0.285859289	Atxn10
727	ENSMUSG00000020776	11.67377792	0.481192735	0.450998097	1.066950699	0.285994099	Fbf1
2294	ENSMUSG00000032504	25.67664113	0.398716021	0.37373753	1.066834312	0.286046661	Pdcd6ip
4371	ENSMUSG00000095432	31.93671261	-0.419556909	0.39328179	-1.066809906	0.286057685	Zfp748
1264	ENSMUSG00000024983	9.91260321	-0.491052237	0.460539106	-1.066255246	0.286308274	Vti1a
4129	ENSMUSG00000073700	11.92445157	-0.536142691	0.504401124	-1.062929215	0.287814053	Klhl21
2654	ENSMUSG00000037149	22.26085273	-0.414743257	0.391034906	-1.060629755	0.288858194	Ddx1
1642	ENSMUSG00000027940	19.75312698	-0.45434159	0.428520174	-1.060257176	0.289027616	Tpm3
910	ENSMUSG00000022016	16.87561462	-0.392879559	0.370552154	-1.060254419	0.28902887	Akap11
2636	ENSMUSG00000036948	16.54166728	0.361634906	0.341313513	1.059538787	0.289354474	Trappc14
2679	ENSMUSG00000037432	15.87418802	0.664201402	0.627129374	1.059113844	0.289547936	Fer1l5
667	ENSMUSG00000020462	26.96563521	-0.410454773	0.38768412	-1.058735067	0.289720453	Cfap36
2641	ENSMUSG00000036992	148.7635186	-0.332064152	0.31377124	-1.058300155	0.289918622	Nxt1
4178	ENSMUSG00000075511	31.81548262	0.472802853	0.44733694	1.056927812	0.290544534	1700001L05Rik
55	ENSMUSG00000001473	16.05306757	0.443881897	0.420150557	1.056482943	0.29074763	Tubb6
3230	ENSMUSG00000045275	13.10784579	-0.428823153	0.406154081	-1.055813972	0.291053214	Lca5l
2118	ENSMUSG00000031483	14.51458402	-0.394634804	0.373786925	-1.055774766	0.291071129	Erlin2
1329	ENSMUSG00000025495	46.67002116	0.496397929	0.470322133	1.055442417	0.291223032	Ptdss2
4044	ENSMUSG00000070280	15.35167769	0.455122217	0.431512265	1.054714441	0.291555945	Slc22a14
3108	ENSMUSG00000042487	15.08106648	-0.591898757	0.562110588	-1.052993431	0.292344003	Leo1
480	ENSMUSG00000017802	26.23480918	0.537024771	0.510570221	1.051813736	0.292885016	Retreg3
117	ENSMUSG00000002814	9.62314325	-0.58563015	0.55698584	-1.051427359	0.293062356	Top3a
4338	ENSMUSG00000092305	24.82988787	0.432660518	0.411595345	1.051179328	0.293176236	Prps1l1
3897	ENSMUSG00000063810	25.83963321	0.39928014	0.379879132	1.05107153	0.293225739	Alms1
1140	ENSMUSG00000024206	41.85840635	0.356666452	0.339764513	1.04974604	0.29383489	Rfx2
2327	ENSMUSG00000032826	15.01050168	0.4704865	0.449498783	1.046691377	0.295241942	Ank2
4554	ENSMUSG00000118751	2038.648253	-0.698902555	0.668134907	-1.046050053	0.295537924	Gm26444
2539	ENSMUSG00000035901	13.43391577	0.430170127	0.411801466	1.044605624	0.296205279	Dennd5a
3514	ENSMUSG00000051940	12.38758783	-0.420165751	0.402567355	-1.043715407	0.296617079	5031410I06Rik
79	ENSMUSG00000002055	63.34938533	-0.406243478	0.389678315	-1.042509841	0.297175365	Spag5
1018	ENSMUSG00000022664	12.195283	0.639554687	0.61430239	1.041107275	0.297825764	Slc35a5
191	ENSMUSG00000004934	70.83499125	0.298137925	0.286721955	1.039815473	0.298425639	Pias4
3720	ENSMUSG00000058558	23.21588583	-0.510271816	0.490816351	-1.039638992	0.298507654	Rpl5
1685	ENSMUSG00000028331	10.65000534	-0.480592868	0.463250953	-1.03743525	0.299533057	Trmo
1608	ENSMUSG00000027635	10.18682299	-0.491106551	0.473663181	-1.036826527	0.29981671	Dsn1
4026	ENSMUSG00000069355	16.46332805	-0.397949009	0.384351311	-1.035378306	0.300492273	Gm5152
1745	ENSMUSG00000028637	40.85290807	0.36877116	0.356210865	1.035260843	0.300547111	Ccdc30
2929	ENSMUSG00000040003	13.41597951	0.502343931	0.485833435	1.033983862	0.301143708	Magi2
1568	ENSMUSG00000027408	9.650038894	-0.446873976	0.432407329	-1.033456064	0.301390522	Cpxm1
2477	ENSMUSG00000034848	10.38353158	0.498158672	0.482343063	1.032789129	0.301702592	Ttc21b
357	ENSMUSG00000011154	16.8467894	-0.479405072	0.464256605	-1.032629513	0.301777311	Cfap161
2744	ENSMUSG00000038042	62.71840031	-0.299054914	0.290137456	-1.030735288	0.302664972	Ptpdc1
2830	ENSMUSG00000038932	17.10567948	0.827094972	0.802678816	1.030418339	0.302813668	Tcfl5
2570	ENSMUSG00000036282	30.63842492	-0.358974227	0.348386252	-1.030391484	0.302826269	Naa30
4347	ENSMUSG00000093885	10.78065939	0.402769328	0.39105349	1.029959681	0.303028933	Rpl35a-ps5
1779	ENSMUSG00000028796	13.35898819	0.387136861	0.37604055	1.029508282	0.30324089	Phc2
270	ENSMUSG00000006720	16.13740745	0.603099347	0.586100572	1.02900317	0.303478185	Zfp184
630	ENSMUSG00000020246	66.36251048	-0.282871876	0.27556864	-1.026502421	0.304654823	Hcfc2
537	ENSMUSG00000019254	9.074031263	-0.449384795	0.438258945	-1.025386476	0.305180867	Ppp1r12c
2248	ENSMUSG00000032258	20.44381743	-0.449043155	0.438376619	-1.024331901	0.305678535	Lca5
3087	ENSMUSG00000041995	10.86096641	-0.510919306	0.499185442	-1.023506021	0.306068655	Zbed3
2365	ENSMUSG00000033365	24.8998533	0.547499617	0.535446531	1.022510345	0.306539419	Ipo13
4300	ENSMUSG00000089809	9.483243825	0.49727818	0.486340051	1.0224907	0.306548712	Rasgef1b
640	ENSMUSG00000020300	10.40729659	0.437029351	0.427553361	1.022163293	0.306703621	Cpeb4
469	ENSMUSG00000017466	19.35398609	-0.529916323	0.518540913	-1.021937344	0.306810556	Timp2
4143	ENSMUSG00000074146	11.86621344	0.518081888	0.507510254	1.020830384	0.307334807	4930579C12Rik
1101	ENSMUSG00000023931	16.27142931	0.482997577	0.473434352	1.020199686	0.307633766	Efhb
1784	ENSMUSG00000028820	23.42710409	-0.471697298	0.462364716	-1.02018446	0.307640986	Sfpq
3550	ENSMUSG00000053070	16.16254752	0.352268077	0.345353208	1.020022598	0.307717743	Cfap300
3137	ENSMUSG00000042772	13.81199858	0.561574397	0.551111455	1.018985165	0.30821001	Smg7
2516	ENSMUSG00000035478	24.83326606	0.343594234	0.338003682	1.016539912	0.309372351	Mbd3
2280	ENSMUSG00000032422	10.03299951	-0.52220578	0.514443702	-1.015088294	0.310063741	Snx14
3881	ENSMUSG00000063316	23.69584715	-0.485184442	0.478757087	-1.013425086	0.310857162	Rpl27
2200	ENSMUSG00000031922	39.93918451	0.367135697	0.362619503	1.012454359	0.311320859	Cep57
2313	ENSMUSG00000032624	19.50901378	0.620287758	0.612717466	1.012355274	0.311368215	Eml4
3277	ENSMUSG00000046562	19.52614232	0.398790344	0.394019318	1.012108611	0.311486126	Unc119b
3043	ENSMUSG00000041308	10.19159976	0.524413943	0.518409261	1.011582898	0.311737526	Sntb2
2407	ENSMUSG00000034006	22.8376683	0.500143192	0.494586841	1.011234329	0.311904289	Slc66a2
496	ENSMUSG00000018412	21.95438382	0.329745934	0.326149381	1.011027319	0.312003355	Kansl1
4106	ENSMUSG00000072770	20.13929769	0.39734983	0.393041766	1.010960832	0.312035177	Acrbp
1044	ENSMUSG00000022833	9.625767965	-0.474479641	0.469824332	-1.009908617	0.312539074	Ccdc14
27	ENSMUSG00000000787	12.06691945	0.710534555	0.703774283	1.009605739	0.312684219	Ddx3x
4546	ENSMUSG00000117815	8.760893303	0.664243144	0.661065222	1.004807274	0.314989661	Gm50166
2396	ENSMUSG00000033863	36.91978878	-0.28348116	0.282422982	-1.003746784	0.315500681	Klf9
4305	ENSMUSG00000090173	15.81809441	0.759518902	0.75672617	1.003690545	0.315527796	Fbxw10
2434	ENSMUSG00000034290	9.639277271	0.496097647	0.49429695	1.003642946	0.315550746	Nek9
683	ENSMUSG00000020532	16.67502255	0.417385868	0.416023826	1.003273951	0.315728701	Acaca
2193	ENSMUSG00000031860	25.06472327	0.388951508	0.388078048	1.002250734	0.31622251	Pbx4
2441	ENSMUSG00000034341	51.63150148	-0.284598483	0.284177776	-1.001480437	0.316594594	Wbp2
2218	ENSMUSG00000032009	16.70589296	0.453010229	0.453185333	0.999613614	0.317497532	Sesn3
1757	ENSMUSG00000028691	22.92606135	-0.579503406	0.580304249	-0.99861996	0.317978827	Prdx1
2831	ENSMUSG00000038936	45.60542958	0.30677429	0.307382583	0.998021057	0.318269148	Sccpdh
3582	ENSMUSG00000054091	21.39489792	-0.361261214	0.362156032	-0.997529192	0.318507711	1810037I17Rik
935	ENSMUSG00000022201	22.33870362	-0.397708978	0.39888875	-0.997042353	0.318743953	Zfr
324	ENSMUSG00000009090	21.74633148	-0.374498745	0.375905132	-0.996258666	0.319124482	Ap1b1
1913	ENSMUSG00000029505	58.21281603	-0.350369086	0.351703039	-0.996207161	0.319149501	Ep400
2847	ENSMUSG00000039105	48.03004018	-0.366251355	0.367873778	-0.995589728	0.319449528	Atp6v1g1
929	ENSMUSG00000022141	62.30602893	-0.413968814	0.416213967	-0.994605771	0.31992804	Nipbl
392	ENSMUSG00000014470	11.1741786	0.418453001	0.420907706	0.994168068	0.320141051	Rnf166
4274	ENSMUSG00000085576	18.24748828	0.492587722	0.495528823	0.994064723	0.320191358	Dpy19l2
3841	ENSMUSG00000062012	12.14902234	-0.526484398	0.530054128	-0.993265348	0.32058066	Zfp13
2635	ENSMUSG00000036928	46.45427753	0.368355746	0.370933443	0.993050783	0.320685207	Stag3
3300	ENSMUSG00000047003	11.05221731	0.528012777	0.532434997	0.991694347	0.32134665	Zfp41
3338	ENSMUSG00000047714	41.5506613	0.241312353	0.244156951	0.988349309	0.322981604	Ppp1r2
2905	ENSMUSG00000039753	12.29197619	-0.408555419	0.413373303	-0.988344957	0.322983735	Fbxl5
4534	ENSMUSG00000116210	30.6445062	0.41625277	0.421254727	0.988126051	0.323090919	Spn-ps
1236	ENSMUSG00000024790	11.30788081	-0.415817896	0.421064063	-0.98754069	0.323377646	Sac3d1
89	ENSMUSG00000002297	24.37846831	-0.375953964	0.380820382	-0.987221225	0.323534199	Dbf4
1262	ENSMUSG00000024974	24.36168732	-0.438840501	0.444975638	-0.98621242	0.324028886	Smc3
3850	ENSMUSG00000062234	13.41022482	0.362563727	0.367785546	0.985802	0.324230284	Gak
4290	ENSMUSG00000087222	14.41604577	0.753748974	0.765434817	0.984733065	0.324755207	E030042O20Rik
543	ENSMUSG00000019470	13.95471208	-0.514273016	0.523037916	-0.983242323	0.325488189	Xab2
2999	ENSMUSG00000040782	13.28740086	-0.367017955	0.373464349	-0.98273893	0.325735945	Cop1
2173	ENSMUSG00000031781	124.4128675	-0.293777186	0.298955967	-0.982677112	0.325766379	Ciapin1
660	ENSMUSG00000020444	15.38688799	0.457893171	0.466189325	0.982204323	0.325999198	Guk1
2867	ENSMUSG00000039285	17.73032052	0.328055954	0.33404968	0.982057382	0.32607158	Azi2
296	ENSMUSG00000007888	10.4190664	0.448728706	0.457324598	0.981203959	0.326492172	Crlf1
3164	ENSMUSG00000043831	8.988171711	0.479073542	0.488288211	0.981128627	0.326529315	Lysmd4
414	ENSMUSG00000015149	46.45776533	0.591814706	0.60408957	0.97968039	0.327243909	Sirt2
523	ENSMUSG00000018776	9.917457551	0.612162794	0.626080185	0.977770594	0.328187798	Slc35g3
2797	ENSMUSG00000038619	17.50195851	0.326279139	0.33408642	0.976630954	0.328751889	Ensa
4146	ENSMUSG00000074227	32.90399564	0.36757359	0.37642756	0.976478954	0.328827172	Spint2
1975	ENSMUSG00000030062	26.49586533	-0.429599042	0.440287852	-0.975723134	0.329201685	Rpn1
1349	ENSMUSG00000025762	62.72940452	0.231928332	0.238644697	0.971856212	0.331122086	Larp1b
3611	ENSMUSG00000055128	9.635743067	-0.471612055	0.485891086	-0.970612693	0.331741183	Cgrrf1
504	ENSMUSG00000018543	27.05237239	0.430567423	0.443664265	0.970480287	0.331807146	1700001P01Rik
4388	ENSMUSG00000096344	18.3238561	-0.401225742	0.413574638	-0.970141071	0.331976179	Gm6408
2861	ENSMUSG00000039218	23.52889673	-0.531366937	0.547773851	-0.970048016	0.332022559	Srrm2
3636	ENSMUSG00000055932	15.67906942	0.556907108	0.574196627	0.969889201	0.332101723	Fto
4368	ENSMUSG00000095296	10.22522992	0.501749229	0.517413955	0.969724963	0.332183604	Gm8906
3738	ENSMUSG00000059119	34.01122636	-0.282387718	0.291557582	-0.968548703	0.332770408	Nap1l4
4474	ENSMUSG00000105879	19.59447472	-0.503693951	0.520126386	-0.968406842	0.332841224	Gm6204
1552	ENSMUSG00000027327	23.6268845	0.339701	0.350868431	0.968172027	0.332958463	1700037H04Rik
470	ENSMUSG00000017478	12.07086369	-0.526365717	0.543872775	-0.96781038	0.333139079	Zc3h18
1231	ENSMUSG00000024772	56.01507006	0.417332046	0.431213901	0.967807495	0.33314052	Ehd1
3845	ENSMUSG00000062036	20.46825596	-0.370644537	0.382992501	-0.967759253	0.333164618	4932415M13Rik
2424	ENSMUSG00000034201	12.57290876	0.420717029	0.434788114	0.967636914	0.333225735	Gas2l1
4396	ENSMUSG00000097048	11.00635869	0.466164327	0.481873223	0.967400355	0.333343932	1600020E01Rik
1369	ENSMUSG00000025950	13.0538332	-0.480888469	0.497654717	-0.966309476	0.333889346	Idh1
2525	ENSMUSG00000035629	11.99778901	-0.390348979	0.404852911	-0.96417481	0.334958291	Rubcn
3923	ENSMUSG00000064357	11.89180681	0.504300409	0.523861101	0.962660537	0.335717907	mt-Atp6
1153	ENSMUSG00000024260	11.01192788	0.444749267	0.462175337	0.962295543	0.335901167	Sap130
3506	ENSMUSG00000051769	15.72657767	-0.407205973	0.423579664	-0.961344483	0.336378989	Wfdc15a
1156	ENSMUSG00000024283	16.98858172	-0.355697954	0.370061579	-0.961185852	0.336458729	Wac
608	ENSMUSG00000020131	11.64114898	0.499703309	0.520128696	0.960730128	0.336687878	Pcsk4
319	ENSMUSG00000008892	50.73452801	0.251656149	0.262214903	0.959732442	0.337189891	Vdac3
1544	ENSMUSG00000027248	48.10534079	-0.429931575	0.44797883	-0.959714045	0.337199153	Pdia3
2889	ENSMUSG00000039607	12.63204993	-0.390710267	0.407151766	-0.959618254	0.337247379	Rbms3
4192	ENSMUSG00000078320	12.40263578	0.736995284	0.768692279	0.95876504	0.337677125	Tex13c1
127	ENSMUSG00000003072	19.49748954	-0.51371211	0.536447264	-0.957619033	0.338254898	Atp5d
4060	ENSMUSG00000070705	10.72174909	0.582901972	0.608703523	0.957612287	0.338258301	Eid2b
2972	ENSMUSG00000040506	13.62901005	-0.442765582	0.462919687	-0.956463063	0.338838337	Ambra1
2205	ENSMUSG00000031948	21.26032496	-0.36328849	0.379940274	-0.956172628	0.338985027	Kars
2537	ENSMUSG00000035890	16.41328622	0.376224648	0.393752539	0.955485009	0.339332483	Rnf126
2898	ENSMUSG00000039697	9.19320055	0.896085837	0.938264528	0.955046056	0.339554407	Ncoa7
3074	ENSMUSG00000041769	40.49522469	0.256655317	0.268753238	0.954985022	0.339585272	Ppp2r2d
2417	ENSMUSG00000034135	12.94306025	0.490939595	0.514439825	0.954318797	0.339922296	Sik3
2228	ENSMUSG00000032078	10.78809985	0.425331228	0.446226088	0.953174274	0.340501779	Zpr1
4568	ENSMUSG00000119520	138.9195324	-0.543585077	0.571101279	-0.95181905	0.341188759	Gm24265
302	ENSMUSG00000008140	13.97336439	0.490880162	0.516158746	0.951025562	0.3415914	Emc10
1291	ENSMUSG00000025154	31.60150402	-0.404937252	0.425899471	-0.950781299	0.341715408	Arhgap19
2042	ENSMUSG00000030650	14.26873184	0.581237814	0.611491452	0.950524839	0.341845639	Tmc5
2168	ENSMUSG00000031756	14.99234348	0.546348661	0.575138426	0.949942894	0.34214127	Cenpn
2285	ENSMUSG00000032468	16.06979866	-0.470078953	0.495238322	-0.94919745	0.342520198	Armc8
3103	ENSMUSG00000042354	16.77379297	-0.388680756	0.409841578	-0.948368288	0.342941998	Gnl3
4578	ENSMUSG00000121269	10.7244871	0.426553503	0.451371982	0.945015462	0.344650982	ENSMUSG00000121269
1107	ENSMUSG00000023961	10.54836808	-0.408631482	0.432771836	-0.944219211	0.34505764	Enpp4
786	ENSMUSG00000021143	17.60722583	0.463033862	0.491162759	0.942729989	0.34581903	Pacs2
2443	ENSMUSG00000034343	14.21302326	0.35224275	0.373860199	0.942177718	0.34610166	Ube2f
568	ENSMUSG00000019917	11.23001903	0.43461997	0.461806431	0.941130181	0.346638151	Septin10
3758	ENSMUSG00000059645	13.15341027	-0.441087419	0.469047293	-0.940390076	0.347017511	Gm7361
618	ENSMUSG00000020191	27.01310134	0.515083112	0.549589487	0.937214273	0.348648349	Spata48
1596	ENSMUSG00000027560	11.08262587	-0.383707501	0.409432	-0.937170276	0.348670977	Dok5
1905	ENSMUSG00000029472	34.87919074	0.384251723	0.410107066	0.936954652	0.348781885	Anapc5
4417	ENSMUSG00000099508	11.35753957	0.353986887	0.377837107	0.936876978	0.348821843	1700030L20Rik
3105	ENSMUSG00000042396	42.7226789	0.246202469	0.262993125	0.936155531	0.349193115	Rbm7
3809	ENSMUSG00000061136	23.76524828	-0.336470493	0.359461889	-0.936039406	0.349252899	Prpf40a
2644	ENSMUSG00000037020	33.27098835	-0.278405506	0.297556043	-0.935640573	0.349458277	Wdr62
1830	ENSMUSG00000029049	12.68458168	0.449990946	0.480945783	0.935637574	0.349459822	Morn1
2936	ENSMUSG00000040054	31.22919667	-0.318198504	0.340418685	-0.934726906	0.349929057	Baz2a
3102	ENSMUSG00000042350	11.32613136	0.518964909	0.555276175	0.934606836	0.349990955	Arel1
2627	ENSMUSG00000036880	14.93498404	-0.93830112	1.004977109	-0.933654221	0.350482287	Acaa2
4492	ENSMUSG00000109228	9.179120477	0.772714248	0.827714272	0.93355192	0.350535076	Fam81b
2650	ENSMUSG00000037103	28.54658596	-0.28024292	0.30037068	-0.932990263	0.350824996	Dcaf15
3963	ENSMUSG00000067288	49.15471443	0.262029708	0.28085223	0.932980691	0.350829938	Rps28
2761	ENSMUSG00000038290	19.28764557	0.300778452	0.322403248	0.932926246	0.35085805	Smg6
856	ENSMUSG00000021693	25.67104761	0.290690039	0.312234856	0.930998041	0.351854578	Kif2a
3665	ENSMUSG00000056899	24.00033541	0.320259391	0.344088328	0.930747617	0.351984132	Immp2l
3910	ENSMUSG00000064128	15.86698071	0.410897763	0.441545528	0.930589798	0.352065794	Cenpj
2640	ENSMUSG00000036990	31.76194704	0.354508228	0.381089118	0.930250198	0.352241557	Otud4
4565	ENSMUSG00000119132	81.38545034	-0.461876217	0.496522192	-0.930222706	0.352255788	Gm24407
4558	ENSMUSG00000118859	55.36558648	-0.683554333	0.734938874	-0.930083245	0.352327985	Gm26316
3906	ENSMUSG00000063972	29.03937122	0.5703875	0.613315887	0.930006074	0.35236794	Nr6a1
755	ENSMUSG00000020922	11.17110575	0.372385056	0.400614163	0.929535425	0.352611675	Lsm12
4468	ENSMUSG00000104824	17.69152069	-0.382553462	0.4118032	-0.928971564	0.352903823	Gm21663
4039	ENSMUSG00000069925	9.882045916	0.449167876	0.483884593	0.928254139	0.353275757	4932416K20Rik
1123	ENSMUSG00000024077	9.147826656	0.613882054	0.662618435	0.9264488	0.354212793	Strn
3206	ENSMUSG00000044863	9.100081549	0.636657279	0.688580482	0.92459385	0.355177213	Defb36
1517	ENSMUSG00000026994	10.31428168	0.467883921	0.506044001	0.924591379	0.355178499	Galnt3
692	ENSMUSG00000020594	24.29042261	-0.467513732	0.505729864	-0.924433706	0.355260553	Pum2
2489	ENSMUSG00000035049	11.04970542	0.412946903	0.446715208	0.924407533	0.355274174	Rrp12
2081	ENSMUSG00000030880	11.31246409	0.62068184	0.672564482	0.922858487	0.356080956	Polr3e
3405	ENSMUSG00000049577	9.858264929	0.489519328	0.530513652	0.922727109	0.356149435	Zfpm1
4542	ENSMUSG00000117296	20.53958607	0.734209514	0.796439339	0.921864954	0.356599022	Gm20742
4402	ENSMUSG00000097375	9.608042505	0.516622864	0.560698715	0.921391203	0.35684622	6720427I07Rik
3115	ENSMUSG00000042572	15.56406408	-0.444279792	0.482849482	-0.920120678	0.3575097	Ube2q1
2737	ENSMUSG00000038002	9.892594694	0.464040021	0.504540741	0.919727551	0.357715151	Cramp1
1869	ENSMUSG00000029234	16.28177572	-0.486973174	0.530015639	-0.918790198	0.35820532	Tmem165
4080	ENSMUSG00000071252	20.03931737	0.318070476	0.346878785	0.916949927	0.35916888	2210408I21Rik
194	ENSMUSG00000004951	11.0201087	-0.560132733	0.610879118	-0.916928925	0.359179885	Hspb1
2383	ENSMUSG00000033658	28.35427526	0.356221661	0.388783131	0.916247729	0.359536977	Ddx19b
3688	ENSMUSG00000057506	9.628681251	-0.403978679	0.441003855	-0.916043419	0.359644122	Bloc1s2
2369	ENSMUSG00000033423	21.77345022	0.308473967	0.336878109	0.915684217	0.359832545	Eri3
415	ENSMUSG00000015165	10.65997337	-0.428594155	0.468319911	-0.915173891	0.360100349	Hnrnpl
3266	ENSMUSG00000046230	15.05725528	0.360419821	0.394038645	0.914681404	0.36035891	Vps13a
4048	ENSMUSG00000070343	27.58438855	-0.329614112	0.360543688	-0.914214068	0.360604374	Gm10288
437	ENSMUSG00000015882	10.2081664	0.508182784	0.555949553	0.91408075	0.360674416	Lcorl
2574	ENSMUSG00000036309	25.1285453	0.29989787	0.328402924	0.913200972	0.361136853	Skp1
612	ENSMUSG00000020156	213.262989	-0.358004116	0.392824753	-0.911358344	0.362106594	Pwwp3a
1605	ENSMUSG00000027628	13.31637649	-0.356951505	0.391689256	-0.911312985	0.362130486	Aar2
3541	ENSMUSG00000052783	11.22927006	0.468077036	0.514240745	0.910229382	0.362701552	Grk4
2271	ENSMUSG00000032384	11.3530081	0.412598959	0.453602783	0.909604118	0.363031326	Csnk1g1
907	ENSMUSG00000022010	50.55270449	-0.228761341	0.251668449	-0.908979023	0.363361199	Tsc22d1
1366	ENSMUSG00000025931	11.60480643	0.374445377	0.412013894	0.908817354	0.363446545	Paqr8
4156	ENSMUSG00000074634	15.59728414	0.585928303	0.644723358	0.908805763	0.363452664	Tmem267
90	ENSMUSG00000002307	48.01881689	-0.348479705	0.383452453	-0.908795086	0.363458301	Daxx
2229	ENSMUSG00000032096	20.25001689	-0.460695596	0.506938759	-0.908779586	0.363466484	Arcn1
3614	ENSMUSG00000055204	15.55800723	0.581084458	0.63964119	0.908453781	0.363638522	Ankrd17
3675	ENSMUSG00000057134	10.05648905	0.379130341	0.417558351	0.907969724	0.363894218	Ado
515	ENSMUSG00000018669	9.332412871	0.467278023	0.515662879	0.906169596	0.364846093	Cdk5rap3
2425	ENSMUSG00000034212	14.57292186	0.56598058	0.624838057	0.90580363	0.365039799	Ankmy1
4516	ENSMUSG00000113902	23.04093169	-0.299888543	0.331247132	-0.905331741	0.365289666	Ndufb1
2933	ENSMUSG00000040025	27.63000654	-0.335703691	0.371920859	-0.902621303	0.366726916	Ythdf2
965	ENSMUSG00000022377	14.80486499	0.465166978	0.515915667	0.901633752	0.367251455	Asap1
466	ENSMUSG00000017417	10.24787042	0.449834982	0.49923911	0.90104115	0.367566441	Plxdc1
1722	ENSMUSG00000028549	11.785366	-0.345735511	0.383790607	-0.900844118	0.367671207	Itgb3bp
2216	ENSMUSG00000031996	15.01741257	0.416393462	0.462335247	0.900631013	0.36778454	Aplp2
119	ENSMUSG00000002957	23.09674767	0.392164346	0.435441423	0.90061332	0.36779395	Ap2a2
2504	ENSMUSG00000035268	17.47364255	0.356407215	0.396044276	0.899917602	0.368164102	Pkig
2663	ENSMUSG00000037253	30.61049947	0.25441611	0.282867557	0.89941778	0.368430172	Mex3c
2818	ENSMUSG00000038784	10.34587632	-0.411326614	0.457509647	-0.899055609	0.368623041	Cnot4
1190	ENSMUSG00000024493	27.82482963	-0.430005105	0.478385506	-0.898867334	0.368723329	Lars
1437	ENSMUSG00000026495	10.6775468	-0.45665531	0.508358978	-0.898292996	0.369029366	Efcab2
2366	ENSMUSG00000033382	24.76861776	-0.398641542	0.443843334	-0.898158227	0.3691012	Trappc8
3762	ENSMUSG00000059734	10.07691307	-0.495887083	0.552385709	-0.897718885	0.369335439	Ndufs8
2771	ENSMUSG00000038416	9.660463725	-0.390319457	0.435006891	-0.897271894	0.36957385	Cdc16
1359	ENSMUSG00000025885	12.62352182	0.494650226	0.551754501	0.896504198	0.369983539	Myo5b
4535	ENSMUSG00000116376	15.87702475	0.408675206	0.45593012	0.896354921	0.370063235	Tmem249
4483	ENSMUSG00000107176	49.19653301	-0.372508957	0.415587942	-0.896342073	0.370070095	Gm9794
942	ENSMUSG00000022253	15.73995171	-0.334550845	0.37325781	-0.896299652	0.370092745	Nadk2
2130	ENSMUSG00000031533	12.24899627	-0.360190514	0.401886518	-0.896249308	0.370119626	Mrps31
4095	ENSMUSG00000071749	13.77547682	-0.351246148	0.392065114	-0.895887279	0.370312969	4933412E24Rik
218	ENSMUSG00000005609	15.15559742	-0.394833362	0.441534369	-0.894230188	0.371198744	Ctr9
2573	ENSMUSG00000036305	10.31660032	-0.624936514	0.69886354	-0.894218224	0.371205143	Rpl39-ps
408	ENSMUSG00000015013	20.77224577	0.473754941	0.530314933	0.893346408	0.371671693	Trappc2l
3284	ENSMUSG00000046723	13.86862551	0.499245159	0.559728634	0.891941431	0.372424326	Adam24
1131	ENSMUSG00000024127	15.82467884	-0.356613044	0.399852572	-0.891861324	0.372467267	Prepl
2458	ENSMUSG00000034552	17.07572509	0.322414605	0.361945038	0.890783328	0.373045421	Zswim2
1394	ENSMUSG00000026150	13.7261113	0.595327685	0.668375578	0.890708316	0.373085672	Mff
1584	ENSMUSG00000027496	44.38458194	-0.274835166	0.308787695	-0.89004572	0.373441337	Aurka
1344	ENSMUSG00000025648	13.57816217	0.572974961	0.643928862	0.889810963	0.373567399	Pfkfb4
3217	ENSMUSG00000045048	9.44326334	0.709692761	0.797869488	0.889484773	0.373742603	Gm9795
879	ENSMUSG00000021846	36.82639734	0.259379444	0.292516137	0.886718412	0.375230523	Peli2
3257	ENSMUSG00000046010	9.661433329	-0.406427698	0.458911872	-0.885633435	0.375815088	Zfp830
1428	ENSMUSG00000026421	10.67837038	-0.879877174	0.994002404	-0.885186163	0.376056234	Csrp1
4157	ENSMUSG00000074673	9.831156373	0.453409965	0.513124365	0.883625874	0.376898207	Ttll9
1436	ENSMUSG00000026491	57.06528049	-0.288461915	0.326634719	-0.883133047	0.377164391	Ahctf1
2275	ENSMUSG00000032405	30.5015812	0.245803563	0.278374441	0.882996162	0.377238345	Pias1
3232	ENSMUSG00000045336	13.79169974	-0.330870102	0.375016754	-0.882280854	0.377624947	Hsfy2
885	ENSMUSG00000021901	14.9328316	0.422514265	0.479264635	0.881588654	0.377999293	Bap1
2647	ENSMUSG00000037070	12.93034381	-0.443098448	0.502630715	-0.881558636	0.378015532	Rbmxl1
3301	ENSMUSG00000047044	27.5483283	-0.349254018	0.396340776	-0.881196281	0.378211592	D030056L22Rik
1491	ENSMUSG00000026857	14.75568441	-0.391294728	0.444302475	-0.880694461	0.378483216	Ntmt1
1945	ENSMUSG00000029726	27.82272865	0.280219911	0.318537237	0.879708487	0.379017251	Mepce
3657	ENSMUSG00000056617	12.42489091	0.556237887	0.633225831	0.878419452	0.379716132	4931429L15Rik
45	ENSMUSG00000001158	15.45706581	-0.358556559	0.40858936	-0.877547469	0.380189348	Snrnp27
1485	ENSMUSG00000026819	8.823174883	-0.386349359	0.440269153	-0.87752993	0.380198869	Slc25a25
1410	ENSMUSG00000026260	11.63558772	-0.381069142	0.434296625	-0.877439797	0.380247805	Ndufa10
1412	ENSMUSG00000026275	14.51702536	0.330153243	0.376619166	0.876623584	0.380691125	Ppp1r7
4464	ENSMUSG00000103034	12.26377015	0.627485189	0.715817614	0.876599257	0.380704343	Gm8797
661	ENSMUSG00000020448	10.58574697	0.36345171	0.415106373	0.875562828	0.381267741	Rnf185
2926	ENSMUSG00000039968	12.59450829	-0.497857633	0.568647725	-0.875511519	0.381295645	Rsbn1l
1103	ENSMUSG00000023935	11.56390986	-0.371335579	0.424170892	-0.875438616	0.381335296	Spats1
4038	ENSMUSG00000069919	265.2845292	-0.497396314	0.568560374	-0.874834646	0.381663883	Hba-a1
3819	ENSMUSG00000061462	10.07569364	-0.37580717	0.429581938	-0.874820695	0.381671475	Obscn
2302	ENSMUSG00000032562	22.70423679	-0.403012093	0.460876224	-0.874447567	0.381874562	Gnai2
2959	ENSMUSG00000040407	10.19065125	0.420226385	0.480644034	0.874298557	0.381955685	Akap9
3699	ENSMUSG00000057816	20.6679526	0.292376634	0.334541661	0.873961806	0.382139054	Cfap299
1164	ENSMUSG00000024325	25.18031758	-0.435314168	0.498127746	-0.873900665	0.382172353	Ring1
2364	ENSMUSG00000033364	10.36434143	0.412250335	0.47174978	0.873874991	0.382186336	Usp37
1614	ENSMUSG00000027702	21.84066142	-0.341801637	0.391268577	-0.87357293	0.382350874	Lrrc34
109	ENSMUSG00000002661	14.01294353	0.424942186	0.486467057	0.873527159	0.382375809	Alkbh7
799	ENSMUSG00000021215	20.81371104	-0.378812101	0.433741747	-0.873358638	0.382467628	Net1
1289	ENSMUSG00000025151	17.13407635	0.403536353	0.46227949	0.872927226	0.382702745	Maged1
2610	ENSMUSG00000036768	15.09341144	0.331430791	0.379809156	0.872624543	0.382867759	Kif15
1538	ENSMUSG00000027199	12.40825703	0.425065784	0.487114603	0.87261967	0.382870416	Gatm
3587	ENSMUSG00000054309	14.26930697	-0.424450994	0.48660332	-0.872273117	0.3830594	Cpsf3
2296	ENSMUSG00000032525	12.58927097	-0.353113072	0.404920247	-0.872055855	0.383177908	Nktr
2870	ENSMUSG00000039330	18.98732485	0.334159305	0.383236056	0.871941197	0.383240458	Tsga10ip
975	ENSMUSG00000022421	11.96573818	-0.396052922	0.454601765	-0.8712085	0.383640319	Nptxr
1907	ENSMUSG00000029478	16.17215878	0.311525136	0.357607916	0.871136018	0.38367989	Ncor2
475	ENSMUSG00000017716	11.97192067	-0.329574883	0.379519678	-0.868399984	0.385175403	Birc5
2593	ENSMUSG00000036555	39.63755738	0.344783175	0.39735674	0.867691776	0.385563089	Iqce
2781	ENSMUSG00000038498	10.26544945	0.504525638	0.581967693	0.866930663	0.385980002	Catsper1
2353	ENSMUSG00000033209	9.905363406	0.365170766	0.421383466	0.866599655	0.386161403	Ttc28
2084	ENSMUSG00000030976	30.37784476	-0.286779312	0.331524552	-0.865031897	0.387021282	Tex36
1274	ENSMUSG00000025027	14.73380304	0.325553963	0.376423675	0.864860488	0.387115367	Xpnpep1
789	ENSMUSG00000021149	9.165995546	0.387972186	0.448708412	0.864642105	0.387235255	Gtpbp4
3242	ENSMUSG00000045629	8.922321619	-0.440725846	0.509739084	-0.86461066	0.38725252	Sh3tc2
1837	ENSMUSG00000029076	15.23813502	-0.382219178	0.442591102	-0.863594356	0.387810766	Sdf4
2599	ENSMUSG00000036598	33.79933242	-0.338653039	0.392290274	-0.863271566	0.387988174	Ccdc113
2450	ENSMUSG00000034432	11.67254327	-0.368153905	0.426480536	-0.863237297	0.388007011	Cops8
3620	ENSMUSG00000055371	12.50292822	-0.369655036	0.428536323	-0.862599075	0.388357939	Stam2
1384	ENSMUSG00000026083	11.38131966	-0.446436724	0.518345209	-0.861272982	0.389087712	Eif5b
33	ENSMUSG00000001025	11.82714457	-0.455146684	0.528547407	-0.861127455	0.389167849	S100a6
1720	ENSMUSG00000028524	10.00401734	0.435323539	0.505561882	0.861068753	0.389200178	Sgip1
1396	ENSMUSG00000026159	38.26605	0.287968523	0.334536069	0.860799627	0.389348411	Agfg1
3477	ENSMUSG00000051176	10.32580502	-0.431755084	0.501595199	-0.860763988	0.389368043	Zfp42
1696	ENSMUSG00000028394	12.52455608	-0.327744321	0.381282692	-0.859583529	0.390018658	Pole3
1473	ENSMUSG00000026761	10.04500369	0.409756431	0.477116607	0.858818212	0.390440818	Orc4
2423	ENSMUSG00000034194	12.23450768	0.44104081	0.513709952	0.858540522	0.390594065	R3hcc1
3418	ENSMUSG00000049800	33.71561593	-0.344263869	0.401065729	-0.858372692	0.390686701	Sertad2
2613	ENSMUSG00000036779	12.46954774	0.435943657	0.50808879	0.85800684	0.390888687	Tent4b
278	ENSMUSG00000007050	20.10499945	0.2793617	0.325626429	0.85792084	0.390936176	Lsm2
3527	ENSMUSG00000052456	21.05991574	0.411453994	0.479680274	0.857767176	0.391021038	Get3
1360	ENSMUSG00000025894	14.48596475	0.422051576	0.492108639	0.857639031	0.391091816	Aasdhppt
4405	ENSMUSG00000097842	9.595733078	0.63679407	0.74331691	0.856692565	0.391614814	9330104G04Rik
1137	ENSMUSG00000024175	30.58841603	0.245317955	0.286536995	0.856147581	0.391916153	Tekt4
1599	ENSMUSG00000027566	10.34693078	-0.482101567	0.563957416	-0.854854557	0.39263167	Psma7
741	ENSMUSG00000020865	14.31220567	0.390231184	0.456550608	0.854738066	0.392696172	Abcc3
2208	ENSMUSG00000031960	25.12535631	-0.276998376	0.324089794	-0.854696386	0.392719252	Aars
3887	ENSMUSG00000063522	20.8414107	0.443289476	0.518784767	0.854476663	0.392840935	Ly6m
256	ENSMUSG00000006356	34.6944489	0.354530867	0.415133972	0.854015549	0.393096374	Crip2
739	ENSMUSG00000020859	21.9077306	0.267976629	0.314169667	0.852967862	0.393677126	Spag9
3711	ENSMUSG00000058290	126.3171269	-0.3681849	0.431864747	-0.852546783	0.393910685	Espl1
957	ENSMUSG00000022337	10.4697725	-0.49460744	0.581003452	-0.851298625	0.394603488	Emc2
2915	ENSMUSG00000039831	65.97505463	-0.296783312	0.348787557	-0.850899942	0.394824937	Arhgap29
3378	ENSMUSG00000048661	13.19414793	0.33646175	0.395677383	0.85034365	0.395134055	Lemd3
673	ENSMUSG00000020482	25.67690581	0.386739017	0.45496684	0.850037812	0.395304065	Ccdc117
4505	ENSMUSG00000110989	26.32011607	-0.337472178	0.397574973	-0.848826513	0.395977835	Gm7444
4073	ENSMUSG00000071037	10.95930983	0.443507955	0.522850479	0.848250071	0.396298717	Camkmt
3640	ENSMUSG00000056209	17.61377756	0.525200179	0.619199225	0.848192565	0.396330737	Npm3
1315	ENSMUSG00000025372	21.25899273	0.327334601	0.386079709	0.847842023	0.396525957	Baiap2
3270	ENSMUSG00000046364	12.1884896	-0.349463735	0.412236748	-0.847725821	0.396590683	Rpl27a
573	ENSMUSG00000019945	11.49299649	0.329136362	0.388597154	0.846986033	0.397002907	Cabcoco1
3165	ENSMUSG00000043859	15.82773511	0.337225093	0.39815247	0.846974762	0.397009189	1700049L16Rik
780	ENSMUSG00000021116	20.72711078	-0.272436682	0.321907098	-0.84632083	0.397373791	Eif2s1
2072	ENSMUSG00000030814	13.13414812	0.590759236	0.698341044	0.845946605	0.397582532	Bcl7c
1889	ENSMUSG00000029406	17.50131567	0.371301346	0.439252979	0.845301827	0.397942341	Pitpnm2
2409	ENSMUSG00000034023	26.48288532	-0.323570208	0.382994122	-0.844843795	0.398198059	Fancd2
3039	ENSMUSG00000041264	15.90368635	-0.340650279	0.4034568	-0.844329007	0.398485581	Uspl1
2340	ENSMUSG00000033021	8.375017311	0.411081947	0.487366062	0.843476761	0.398961857	Gmppa
1769	ENSMUSG00000028757	16.135363	-0.413107253	0.489934393	-0.843188923	0.399122792	Ddost
4252	ENSMUSG00000082396	10.72016579	0.389001172	0.46152691	0.842856968	0.399308443	Zfp389
488	ENSMUSG00000018209	12.25245429	-0.40833706	0.484473813	-0.842846505	0.399314295	Stk4
1114	ENSMUSG00000024036	14.60732493	0.505583859	0.600030795	0.842596518	0.399454139	Slc37a1
3931	ENSMUSG00000065232	13.5272002	-0.631742023	0.750014645	-0.84230625	0.399616553	Gm22973
22	ENSMUSG00000000711	10.52777473	-0.543498359	0.645987056	-0.841345587	0.400154359	Rab5b
3973	ENSMUSG00000067847	16.19501824	0.356716407	0.424148103	0.841018514	0.400337563	Romo1
1303	ENSMUSG00000025234	44.99172105	-0.29062122	0.345593786	-0.840933002	0.400385469	Arih1
3721	ENSMUSG00000058589	15.18662361	0.427312701	0.508157575	0.840905896	0.400400655	Anks1b
77	ENSMUSG00000002031	12.83385322	-0.3529766	0.419781945	-0.840857029	0.400428034	Ift46
4276	ENSMUSG00000085820	18.54969641	0.577333583	0.687372211	0.839914059	0.400956575	4933406K04Rik
4564	ENSMUSG00000119079	14.19057668	0.730917066	0.87023964	0.839903209	0.400962658	Gm24949
4537	ENSMUSG00000116780	15.32351005	0.390501517	0.465201675	0.839424142	0.401231341	Dynlt2a3
905	ENSMUSG00000021996	9.822836959	-0.654069819	0.779261255	-0.839346003	0.401275175	Esd
1355	ENSMUSG00000025857	18.95377227	-0.381027254	0.453991884	-0.839282082	0.401311036	Dnaaf5
1535	ENSMUSG00000027167	9.74615084	-0.406989353	0.48503314	-0.839095971	0.401415457	Elp4
418	ENSMUSG00000015242	19.36126237	-0.291965179	0.348330698	-0.838183888	0.401927435	Nipsnap3a
2393	ENSMUSG00000033799	15.17154223	0.476176233	0.568349312	0.837823189	0.402130013	Tasor2
1463	ENSMUSG00000026683	40.31144016	-0.337873886	0.403326629	-0.837717773	0.402189229	Nuf2
2813	ENSMUSG00000038762	11.5299825	-0.372573036	0.445369847	-0.836547509	0.402846961	Abcf1
1867	ENSMUSG00000029223	11.14415528	0.406729884	0.486382486	0.836234643	0.403022913	Uchl1
3882	ENSMUSG00000063358	10.81594269	-0.354033452	0.423496358	-0.83597756	0.403167527	Mapk1
3442	ENSMUSG00000050213	44.60400822	-0.333207179	0.398653068	-0.835832471	0.403249156	Snip1
125	ENSMUSG00000003037	9.699762287	0.368303192	0.440811798	0.835511196	0.403429946	Rab8a
1612	ENSMUSG00000027668	18.78674278	-0.266167049	0.318607138	-0.835408305	0.403487856	Mfn1
4471	ENSMUSG00000105297	9.237271911	0.359537138	0.430435988	0.835285962	0.40355672	1700052H01Rik
1502	ENSMUSG00000026915	23.78065831	-0.324900808	0.389120289	-0.834962394	0.403738882	Strbp
67	ENSMUSG00000001767	12.5778659	-0.422072156	0.506823838	-0.832778817	0.404969484	Crnkl1
1555	ENSMUSG00000027342	21.26010556	0.293617941	0.352969806	0.831850021	0.405493605	Pcna
2805	ENSMUSG00000038695	11.72177628	0.318160577	0.382559478	0.831663037	0.40559917	Josd2
952	ENSMUSG00000022307	23.01184297	0.287990627	0.346349549	0.831502822	0.405689635	Oxr1
2136	ENSMUSG00000031556	14.66768411	0.305426557	0.367512985	0.831063309	0.405937866	Tm2d2
1549	ENSMUSG00000027304	23.83927301	-0.266137087	0.320403659	-0.830630609	0.406182338	Rtf1
2117	ENSMUSG00000031481	9.73836488	-0.388225649	0.468050282	-0.829452869	0.406848196	Tpte
745	ENSMUSG00000020888	10.97401502	-0.36528148	0.440584976	-0.829082924	0.407057486	Dvl2
814	ENSMUSG00000021326	23.24963328	0.409989615	0.494547461	0.829019755	0.407093229	Trim27
3660	ENSMUSG00000056763	21.49766339	-0.312881344	0.377474926	-0.828879808	0.407172422	Cspp1
293	ENSMUSG00000007850	24.23665029	0.393246618	0.474499521	0.828760831	0.407239756	Hnrnph1
1206	ENSMUSG00000024560	35.68782441	-0.325162439	0.392619778	-0.828186599	0.407564832	Cxxc1
3704	ENSMUSG00000058135	62.9138445	-0.472675201	0.570938688	-0.827891349	0.407732035	Gstm1
40	ENSMUSG00000001119	10.85782322	-0.735679592	0.888763505	-0.827756302	0.407808527	Col6a1
1519	ENSMUSG00000027002	75.27981294	-0.24946728	0.301526703	-0.827347222	0.408040286	Nckap1
549	ENSMUSG00000019715	16.94359549	0.300920146	0.364000803	0.826701873	0.40840606	Gle1
2766	ENSMUSG00000038374	24.64762917	-0.406051732	0.491462383	-0.826211214	0.408684288	Rbm8a
3280	ENSMUSG00000046671	29.61197602	-0.223916069	0.271055419	-0.826089622	0.408753254	Mtfr1l
1014	ENSMUSG00000022641	36.53759453	0.334818384	0.405399696	0.825896979	0.408862535	Bbx
473	ENSMUSG00000017686	11.81410398	0.361835327	0.438303061	0.825536848	0.409066872	Rhot1
2757	ENSMUSG00000038246	23.31978862	-0.27947126	0.338778536	-0.824937917	0.409406838	Fam50b
3363	ENSMUSG00000048329	27.18968551	-0.338279619	0.410181866	-0.824706422	0.409538285	Mfsd6l
115	ENSMUSG00000002763	23.81031398	0.413496915	0.502143908	0.823462973	0.410244765	Pex6
1435	ENSMUSG00000026482	16.14014205	0.408989252	0.496791504	0.823261366	0.410359379	Rgl1
1284	ENSMUSG00000025132	26.78816011	-0.428626447	0.520922857	-0.822821347	0.410609595	Arhgdia
311	ENSMUSG00000008604	15.6190403	0.314586469	0.382469192	0.822514535	0.410784118	Ubqln4
2821	ENSMUSG00000038828	13.88114756	-0.33361891	0.405769079	-0.822189091	0.410969286	Tmem214
545	ENSMUSG00000019494	29.33675349	0.254238136	0.309298728	0.821982482	0.411086867	Cops6
994	ENSMUSG00000022538	12.97077403	-0.467419998	0.568908482	-0.821608418	0.411299797	Lsg1
4214	ENSMUSG00000079235	8.664243948	0.366268296	0.446013928	0.821203718	0.411530239	Ccdc13
164	ENSMUSG00000004069	11.76496066	0.342956551	0.417790017	0.82088259	0.411713149	Dnaja3
3357	ENSMUSG00000048109	41.14977317	-0.289553512	0.352768528	-0.820803129	0.411758416	Rbm15
4438	ENSMUSG00000101111	242.6637395	0.301691457	0.3675872	0.820734391	0.411797577	Gm28437
2209	ENSMUSG00000031966	14.23574049	-0.499989303	0.609519774	-0.82030038	0.41204489	Glb1l3
1663	ENSMUSG00000028134	32.85545299	-0.27356508	0.333575755	-0.820098811	0.41215978	Ptbp2
4228	ENSMUSG00000079553	13.81803218	-0.533672984	0.650744236	-0.820096367	0.412161173	Kifc1
2394	ENSMUSG00000033845	13.77800831	-0.371288982	0.453366866	-0.818959237	0.412809671	Mrpl15
1670	ENSMUSG00000028184	18.7541187	-0.308777554	0.37704624	-0.81893816	0.412821697	Adgrl2
3247	ENSMUSG00000045763	14.36481336	0.445050176	0.543450777	0.818933738	0.41282422	Basp1
183	ENSMUSG00000004667	14.9642112	0.287947495	0.351701473	0.81872701	0.412942183	Polr2e
3349	ENSMUSG00000047945	25.86171443	0.261977761	0.320403534	0.817649412	0.413557404	Marcksl1
3356	ENSMUSG00000048078	13.84706313	0.463182673	0.566943607	0.816981913	0.413938764	Tenm4
1498	ENSMUSG00000026885	24.57239484	0.255268788	0.312501052	0.816857372	0.414009941	Ttll11
206	ENSMUSG00000005312	25.02725949	0.367707466	0.451181051	0.814988718	0.415078768	Ubqln1
3693	ENSMUSG00000057657	28.98768126	-0.312547405	0.38362515	-0.814720841	0.415232121	Rps18-ps3
3840	ENSMUSG00000061983	13.83868789	0.438169373	0.538032442	0.814392105	0.41542036	Rps12
1471	ENSMUSG00000026753	13.12738541	-0.366451297	0.450034439	-0.814273898	0.41548806	Ppp6c
1723	ENSMUSG00000028551	17.68591044	0.296715787	0.364411973	0.814231717	0.415512219	Cdkn2c
3837	ENSMUSG00000061887	15.52495402	-0.297339015	0.365337879	-0.81387404	0.415717114	Ssbp3
2293	ENSMUSG00000032497	25.59445257	0.344330595	0.423085679	0.813855472	0.415727752	Lrrfip2
1220	ENSMUSG00000024667	10.22286905	-0.334257254	0.410851557	-0.813571831	0.415890281	Tmem216
1213	ENSMUSG00000024621	11.80059226	-0.721746363	0.887714816	-0.813038546	0.416195958	Csf1r
1660	ENSMUSG00000028109	37.44256143	-0.392021067	0.482414228	-0.812623353	0.416434038	Hormad1
2907	ENSMUSG00000039768	9.806602985	0.497043014	0.613144768	0.810645445	0.417569311	Dnajc11
4351	ENSMUSG00000094036	16.2343245	0.348723175	0.430360701	0.810304412	0.41776524	Gm6465
3857	ENSMUSG00000062580	15.13936649	0.360891327	0.445400449	0.810262602	0.417789264	Timm17a
4236	ENSMUSG00000079658	23.10981555	0.299729151	0.369979594	0.810123466	0.417869219	Eloc
1033	ENSMUSG00000022781	12.78423768	0.303453874	0.374613057	0.810046175	0.417913638	Pak2
2541	ENSMUSG00000035919	17.4963364	0.296385045	0.366133599	0.809499717	0.418227765	Bbs9
2947	ENSMUSG00000040231	68.78335514	0.252339322	0.311752195	0.809422761	0.418272015	Syngr4
898	ENSMUSG00000021969	21.43346969	0.373828006	0.462121316	0.808939111	0.418550171	Zdhhc20
2748	ENSMUSG00000038126	10.1823069	0.368455157	0.455895959	0.808200094	0.418975404	Mphosph9
204	ENSMUSG00000005237	11.49936413	0.343978124	0.425689608	0.808049146	0.419062291	Dnah2
236	ENSMUSG00000005886	20.1877058	0.278818073	0.345320125	0.807419124	0.419425053	Ncoa2
1271	ENSMUSG00000025024	17.45244112	-0.403003795	0.499191169	-0.80731355	0.41948586	Smndc1
432	ENSMUSG00000015733	10.44818364	-0.496447525	0.61515163	-0.807032771	0.419647603	Capza2
1647	ENSMUSG00000027985	14.13296165	-0.311550611	0.386341931	-0.80641159	0.420005566	Lef1
3253	ENSMUSG00000045948	10.97413003	-0.354668922	0.440087934	-0.805904672	0.420297817	Mrps12
124	ENSMUSG00000003033	19.96448775	-0.270321389	0.335641338	-0.805387651	0.420596016	Ap1m1
3294	ENSMUSG00000046846	23.28676643	-0.282533201	0.350832281	-0.805322702	0.420633484	Spesp1
2572	ENSMUSG00000036299	13.5512062	0.294049851	0.365247946	0.805069142	0.420779781	BC031181
3607	ENSMUSG00000055022	13.01071903	0.581025973	0.72186039	0.804900754	0.420876953	Cntn1
3731	ENSMUSG00000058816	36.2539369	0.451589959	0.561074666	0.804866066	0.420896972	Ppp1r2-ps3
4550	ENSMUSG00000118642	3163.157453	0.558413802	0.694039491	0.804585055	0.421059169	AY036118
3374	ENSMUSG00000048602	55.21693852	-0.233194555	0.289863658	-0.804497386	0.421109779	Morc2b
2767	ENSMUSG00000038375	13.10853606	0.455075342	0.56587048	0.804204067	0.42127913	Trp53inp2
3646	ENSMUSG00000056260	29.0368604	-0.312467775	0.388600194	-0.804085484	0.421347608	Lrif1
103	ENSMUSG00000002489	17.98603728	0.33895352	0.421583249	0.804001395	0.42139617	Tiam1
156	ENSMUSG00000003808	13.40468147	-0.366497594	0.456024689	-0.803679282	0.421582223	Farsa
900	ENSMUSG00000021981	24.92834	0.264221411	0.328792986	0.803610241	0.421622107	Cab39l
4491	ENSMUSG00000109179	14.24011932	0.468144349	0.582639781	0.803488475	0.421692455	Gm35339
4374	ENSMUSG00000095528	15.3294081	0.310701634	0.387610784	0.8015815	0.422795083	Gm10375
3432	ENSMUSG00000050052	9.855291307	-0.360976883	0.450643466	-0.801025446	0.423116915	Tdrp
2279	ENSMUSG00000032418	103.5814212	0.311599378	0.389016908	0.800991864	0.423136356	Me1
221	ENSMUSG00000005625	25.32771327	-0.319246863	0.398936912	-0.800243982	0.423569452	Psmd4
2390	ENSMUSG00000033769	10.73062271	0.482874543	0.603885129	0.799613237	0.423934916	Exoc6b
4186	ENSMUSG00000076441	16.64915392	-0.845846301	1.058738854	-0.798918731	0.424337537	Ass1
753	ENSMUSG00000020914	56.61916889	-0.344147325	0.430971268	-0.798538906	0.424557825	Top2a
4410	ENSMUSG00000098875	19.14212391	0.489602285	0.614036071	0.797351016	0.425247199	Gm27211
1831	ENSMUSG00000029053	7.933108528	0.60483923	0.758562013	0.797349748	0.425247935	Prkcz
4430	ENSMUSG00000100684	15.26700464	-0.344530225	0.43230891	-0.796953792	0.425477868	Gm20268
4046	ENSMUSG00000070319	74.6665926	0.243617057	0.30593356	0.796307072	0.425853576	Eif3g
1649	ENSMUSG00000028013	25.3536477	0.350696084	0.440545537	0.796049568	0.426003225	Ppa2
2941	ENSMUSG00000040188	30.40898291	-0.281940185	0.354455189	-0.795418418	0.42637015	Scamp2
1709	ENSMUSG00000028438	10.85485082	0.436631516	0.548950659	0.795393009	0.426384925	Kif24
1373	ENSMUSG00000025977	23.79745516	0.301116588	0.379010457	0.794480951	0.426915494	Boll
728	ENSMUSG00000020780	11.5233649	-0.341563687	0.430737087	-0.792974872	0.427792463	Srp68
2411	ENSMUSG00000034031	18.61077243	0.297595959	0.375699677	0.792111298	0.428295783	Ccdc182
1158	ENSMUSG00000024290	14.47067853	0.377053253	0.476478391	0.791333374	0.428749478	Rock1
5	ENSMUSG00000000131	32.75816746	-0.266367583	0.33663688	-0.79126085	0.428791789	Xpo6
3580	ENSMUSG00000054003	17.28203854	0.474216553	0.5999302	0.790452877	0.429263332	Tdrd9
4463	ENSMUSG00000102869	11.90951323	0.328157493	0.415331972	0.790108912	0.429464166	Norad
3639	ENSMUSG00000056167	12.63355311	-0.347705133	0.440194129	-0.789890437	0.429591757	Cnot10
4180	ENSMUSG00000075595	8.943884107	-0.370325047	0.469190166	-0.789285613	0.429945094	Zfp652
3742	ENSMUSG00000059263	30.43270689	0.252619075	0.320280266	0.788743804	0.43026176	Usp47
1481	ENSMUSG00000026791	14.48979931	0.296213289	0.375610734	0.788617743	0.430335458	Slc2a8
2356	ENSMUSG00000033257	14.75885578	-0.299389001	0.379660979	-0.788569322	0.430363767	Ttll4
1203	ENSMUSG00000024537	26.9984655	0.318082596	0.40352516	0.788259637	0.430544852	Psmg2
974	ENSMUSG00000022420	20.50766697	-0.268134281	0.341249557	-0.785742505	0.432018356	Dnal4
2149	ENSMUSG00000031637	21.09488282	0.296870761	0.378772798	0.783770014	0.433175072	Lrp2bp
84	ENSMUSG00000002205	10.06451464	-0.332624967	0.424443764	-0.783672645	0.433232218	Vrk3
3461	ENSMUSG00000050821	11.64340881	0.48780771	0.622675388	0.78340612	0.433388663	Fam131a
3184	ENSMUSG00000044362	35.93504804	-0.267247919	0.341426701	-0.782738779	0.433780525	Ccdc89
2932	ENSMUSG00000040022	9.666132775	-0.342042298	0.437208202	-0.782332756	0.434019041	Rab11fip2
257	ENSMUSG00000006373	20.10628426	-0.530477289	0.679202481	-0.781029669	0.434785045	Pgrmc1
3930	ENSMUSG00000064923	114.4611068	-0.544494011	0.697552094	-0.780578276	0.435050573	Gm22042
2381	ENSMUSG00000033632	12.6025897	0.410162446	0.525616339	0.780345692	0.435187425	AW554918
914	ENSMUSG00000022033	93.2484231	-0.336384762	0.431285568	-0.779958307	0.435415417	Pbk
842	ENSMUSG00000021597	24.4159694	-0.375765145	0.48190638	-0.77974719	0.435539696	Slf1
2996	ENSMUSG00000040734	35.98731576	-0.284789382	0.365295938	-0.77961278	0.435618831	Ppp1r13l
2334	ENSMUSG00000032939	12.36728399	-0.435927189	0.560204351	-0.778157449	0.436476198	Nup93
4428	ENSMUSG00000100487	8.432028674	0.681326112	0.876057587	0.777718409	0.436735037	1700072B07Rik
3463	ENSMUSG00000050856	14.76059284	-0.342542382	0.440511937	-0.777600682	0.436804459	Atp5k
2902	ENSMUSG00000039720	12.19647215	0.316184589	0.406707635	0.77742477	0.436908203	Got1l1
2712	ENSMUSG00000037742	17.40165654	0.338428911	0.435886647	0.776414954	0.437504018	Eef1a1
897	ENSMUSG00000021967	20.48151622	0.332999044	0.429034084	0.776159883	0.43765459	Mrpl57
1354	ENSMUSG00000025825	12.6136508	0.303512482	0.391049336	0.776148824	0.437661119	Iscu
3010	ENSMUSG00000040866	28.3528512	0.273352335	0.35220695	0.776112835	0.437682366	Rsph6a
2858	ENSMUSG00000039198	13.01368723	0.337738067	0.435305007	0.775865339	0.4378285	Ptchd3
2442	ENSMUSG00000034342	15.6185427	0.417585556	0.538259221	0.775807528	0.437862638	Cbl
3320	ENSMUSG00000047407	28.66712227	-0.260532505	0.33590087	-0.775623194	0.437971502	Tgif1
1941	ENSMUSG00000029705	13.13639626	0.322870238	0.416472272	0.775250261	0.438191794	Cux1
1511	ENSMUSG00000026965	29.63825415	-0.326918632	0.4217476	-0.775152323	0.438249657	Anapc2
189	ENSMUSG00000004897	34.56714061	0.245693641	0.317013881	0.775024867	0.438324966	Hdgf
101	ENSMUSG00000002477	16.17398907	-0.342356144	0.441824801	-0.774868552	0.438417337	Snrpd1
4035	ENSMUSG00000069769	18.09112714	0.36155379	0.467033981	0.774148788	0.438842809	Msi2
213	ENSMUSG00000005483	54.94933678	0.219344626	0.283363999	0.774073723	0.438887196	Dnajb1
306	ENSMUSG00000008384	10.36792807	0.334991701	0.433032718	0.773594435	0.439170664	Sertad1
4552	ENSMUSG00000118698	886.676259	-0.505137594	0.655654878	-0.770432144	0.441043592	Gm25890
1934	ENSMUSG00000029678	10.29780824	0.304829158	0.395844631	0.770072737	0.441256747	Hyal5
4057	ENSMUSG00000070565	11.69928938	-0.322561764	0.419024062	-0.76979294	0.441422728	Rasal2
1683	ENSMUSG00000028314	15.69884423	-0.275075954	0.35759962	-0.769228877	0.441757451	Toporsl
395	ENSMUSG00000014529	26.90925048	-0.249526712	0.324674256	-0.768544804	0.442163583	Tmbim7
1504	ENSMUSG00000026918	15.02961448	-0.314407487	0.409358496	-0.768049253	0.442457924	Brd3
4487	ENSMUSG00000107470	24.63202678	-0.33304059	0.433634355	-0.76802169	0.442474299	Gm3375
4540	ENSMUSG00000116970	11.84538496	0.800187043	1.041922831	0.767990699	0.442492711	Gm49796
2864	ENSMUSG00000039224	30.37725407	-0.329330919	0.428856857	-0.767927372	0.442530334	D1Pas1
1687	ENSMUSG00000028339	12.42773374	0.355977245	0.464317562	0.766667631	0.443279154	Col15a1
598	ENSMUSG00000020078	29.76858532	-0.223090409	0.291069947	-0.766449478	0.443408902	Vps26a
3705	ENSMUSG00000058173	19.7341551	0.305457297	0.39871083	0.766112364	0.443609447	Smco4
3161	ENSMUSG00000043644	12.83053059	0.420711173	0.54917697	0.766075775	0.443631216	0610009L18Rik
3796	ENSMUSG00000060860	392.9167059	-0.291441065	0.380447533	-0.766047983	0.443647752	Ube2s
2357	ENSMUSG00000033276	13.50979053	0.421359094	0.550626686	0.765235512	0.444131317	Stk36
1651	ENSMUSG00000028029	17.15153754	-0.260291283	0.340226869	-0.765052108	0.444240517	Aimp1
1973	ENSMUSG00000030057	37.90634071	0.244882203	0.320790197	0.76337184	0.445241669	Cnbp
1866	ENSMUSG00000029206	18.8637816	0.488679087	0.640309669	0.763191797	0.44534902	Nsun7
3055	ENSMUSG00000041477	10.84088447	-0.313429871	0.41125867	-0.762123435	0.445986337	Dcp1b
1324	ENSMUSG00000025451	11.73896594	-0.341142856	0.447942538	-0.76157727	0.446312345	Paip1
1407	ENSMUSG00000026245	10.35114381	-0.308064593	0.405491417	-0.759731476	0.44741511	Farsb
542	ENSMUSG00000019437	9.859937141	0.357035288	0.470077436	0.75952441	0.447538917	Tlcd1
4563	ENSMUSG00000119030	417.2155905	-0.555258793	0.731091978	-0.759492389	0.447558065	Rnu1b2
704	ENSMUSG00000020657	18.27824738	0.284191858	0.374223695	0.759417057	0.447603113	Dnajc27
2545	ENSMUSG00000035984	16.89740437	0.400302817	0.527400058	0.759011705	0.447845555	Nme5
1039	ENSMUSG00000022807	10.62271184	-0.315548129	0.4160006	-0.758528061	0.448134921	Osbpl11
1350	ENSMUSG00000025781	30.79613095	0.235483971	0.310488069	0.758431625	0.448192631	Atp5c1
2422	ENSMUSG00000034190	12.44414808	-0.320751416	0.422971601	-0.758328492	0.448254355	Chmp7
267	ENSMUSG00000006676	73.30744986	-0.288928593	0.381169619	-0.758005304	0.448447808	Usp19
1972	ENSMUSG00000030042	11.13479788	0.473647965	0.625350766	0.757411665	0.44880327	Pole4
1661	ENSMUSG00000028126	14.8401318	0.357696147	0.472673935	0.75675031	0.449199467	Pip5k1a
1179	ENSMUSG00000024422	11.3346187	0.440704051	0.582798915	0.756185435	0.449538024	Dhx16
2315	ENSMUSG00000032641	9.857561221	-0.316000933	0.417957881	-0.756059276	0.449613657	Gpr19
3753	ENSMUSG00000059498	13.71276189	-0.441142363	0.58349441	-0.756035286	0.44962804	Fcgr3
2026	ENSMUSG00000030491	15.54800941	0.330094454	0.437743553	0.754081816	0.450800096	Tdrd12
1096	ENSMUSG00000023873	63.36281071	-0.202727995	0.269166519	-0.753169433	0.451348105	1700010I14Rik
4085	ENSMUSG00000071454	13.41841969	-0.353002067	0.468767042	-0.7530437	0.451423654	Dtnb
1582	ENSMUSG00000027480	17.54426489	0.308404717	0.409582922	0.752972598	0.451466381	Sun5
1376	ENSMUSG00000025983	43.14981123	-0.228137322	0.303030009	-0.752853892	0.451537718	Ccdc150
2807	ENSMUSG00000038697	24.11893067	0.224307171	0.298014143	0.752672907	0.451646494	Taf5l
3051	ENSMUSG00000041431	178.873278	-0.266430541	0.353979981	-0.752671212	0.451647513	Ccnb1
675	ENSMUSG00000020484	10.14799066	-0.521872584	0.693471919	-0.75255042	0.451720121	Xbp1
2588	ENSMUSG00000036463	20.44589475	-0.285402868	0.379338886	-0.752369131	0.451829105	4930544G11Rik
328	ENSMUSG00000009470	14.91737788	0.301096826	0.400220464	0.75232741	0.451854188	Tnpo1
3502	ENSMUSG00000051728	11.97169308	0.574773831	0.764343528	0.751983644	0.452060895	Fam243
3755	ENSMUSG00000059534	18.16987676	0.336927925	0.448258484	0.751637586	0.452269034	Uqcr10
338	ENSMUSG00000010025	10.18481023	0.313560965	0.417400673	0.751222949	0.452518491	Aldh3a2
4125	ENSMUSG00000073633	12.31578215	0.362337275	0.482381885	0.751141962	0.452567224	Fbxo36
3567	ENSMUSG00000053565	27.04842208	-0.28049816	0.373859438	-0.750277058	0.453087857	Eif3k
909	ENSMUSG00000022014	24.21384328	0.341306312	0.455140026	0.749892984	0.45331916	Epsti1
1884	ENSMUSG00000029390	16.07600555	-0.272829505	0.363877899	-0.749783117	0.453385338	Tmed2
3434	ENSMUSG00000050079	19.58478065	0.273059934	0.364246044	0.749657927	0.453460753	Rspry1
3089	ENSMUSG00000042050	20.92559983	-0.381918026	0.509874805	-0.749042749	0.45383144	Dync2i1
1952	ENSMUSG00000029784	43.48920558	0.237737037	0.317474609	0.748837954	0.453954881	Ssmem1
1219	ENSMUSG00000024665	28.60495377	-0.756402825	1.011038524	-0.748144415	0.454373054	Fads2
1753	ENSMUSG00000028676	12.76724775	-0.33660315	0.449993535	-0.748017747	0.454449453	Srsf10
1808	ENSMUSG00000028944	12.13754275	0.345024795	0.461362954	0.747838101	0.454557817	Prkag2
3975	ENSMUSG00000067851	15.75751367	0.322097389	0.43081624	0.747644492	0.454674621	Arfgef1
2505	ENSMUSG00000035293	15.12401746	0.318072063	0.425554999	0.747428801	0.454804766	G2e3
2085	ENSMUSG00000030978	18.78396006	-0.334626241	0.447757612	-0.747337915	0.454859611	Rrm1
1034	ENSMUSG00000022783	35.0765568	-0.220113258	0.294715532	-0.746866841	0.455143944	Spag6l
4004	ENSMUSG00000068860	78.53592981	0.227887227	0.305160923	0.746777223	0.455198047	Gm128
2798	ENSMUSG00000038628	12.15161893	-0.383523701	0.513752991	-0.746513806	0.455357095	Polr3k
3695	ENSMUSG00000057706	22.37571725	0.386915468	0.518438831	0.746308813	0.455480889	Mex3b
3771	ENSMUSG00000059970	181.1148347	-0.268364157	0.359659416	-0.746161912	0.455569613	Hspa2
3106	ENSMUSG00000042404	22.23422284	-0.33210346	0.44576774	-0.745014567	0.456262914	Dennd4b
2550	ENSMUSG00000036036	14.05697972	0.276679831	0.371542581	0.744678661	0.456466002	Zfp57
2683	ENSMUSG00000037458	18.86598967	-0.258836177	0.348373788	-0.742984078	0.45749132	Azin1
3852	ENSMUSG00000062270	52.04556109	-0.17570922	0.23649145	-0.742983394	0.457491734	Morf4l1
3412	ENSMUSG00000049719	10.08411848	-0.320090894	0.430901513	-0.742840032	0.457578536	Prss46
2834	ENSMUSG00000038967	10.88963431	-0.336458358	0.453115183	-0.742544878	0.457757272	Pdk2
3867	ENSMUSG00000062929	14.7576293	-0.277975272	0.375911752	-0.739469491	0.459621959	Cfl2
1238	ENSMUSG00000024826	29.76709235	0.301289491	0.407470867	0.739413578	0.4596559	Dpf2
360	ENSMUSG00000011349	61.0954529	-0.312694165	0.423079285	-0.739091174	0.459851636	Dmrtc2
3791	ENSMUSG00000060715	12.76231425	-0.287830005	0.389479307	-0.739012317	0.459899518	1700019A02Rik
433	ENSMUSG00000015757	9.491181312	-0.39203282	0.53140378	-0.737730583	0.460678184	Ppil4
434	ENSMUSG00000015804	49.73037559	-0.241054257	0.326774173	-0.737678424	0.460709886	Med28
2257	ENSMUSG00000032294	30.63723066	0.42984481	0.582868621	0.737464317	0.460840035	Pkm
147	ENSMUSG00000003436	10.7600055	0.295957485	0.401919356	0.736360367	0.461511417	Dll3
168	ENSMUSG00000004127	9.327360286	-0.315535203	0.42862026	-0.736164927	0.461630334	Trmt10a
572	ENSMUSG00000019944	11.15267911	-0.299637141	0.407464781	-0.735369424	0.462114538	Rhobtb1
620	ENSMUSG00000020196	13.97603399	0.382994101	0.520868942	0.735298402	0.462157781	Cabin1
694	ENSMUSG00000020608	23.55571019	-0.301825627	0.410604811	-0.735075719	0.462293381	Smc6
1388	ENSMUSG00000026107	34.59829121	0.249674855	0.339920094	0.734510431	0.462637705	Nabp1
29	ENSMUSG00000000811	89.7443458	-0.190600337	0.259526168	-0.734416644	0.462694846	Txnrd3
533	ENSMUSG00000019178	11.12080955	0.326137655	0.444398044	0.733886341	0.463018012	Styxl1
2815	ENSMUSG00000038780	21.07574922	0.252939177	0.344660189	0.733879877	0.463021952	Smurf1
1086	ENSMUSG00000023350	21.20614037	-0.268862886	0.366875217	-0.732845594	0.463652609	Phf8-ps
105	ENSMUSG00000002546	14.64811866	-0.283334043	0.386663352	-0.732766736	0.463700713	Golga2
3444	ENSMUSG00000050299	81.80054437	-0.229971135	0.313898827	-0.732628207	0.463785222	Gm9843
4298	ENSMUSG00000088185	441.1006434	0.699553629	0.954856648	0.732626861	0.463786044	Scarna2
1301	ENSMUSG00000025228	43.69820195	-0.196702896	0.268661625	-0.732158515	0.464071822	Actr1a
1343	ENSMUSG00000025613	124.1173695	-0.33626825	0.459329954	-0.732084305	0.464117113	Cct8
3122	ENSMUSG00000042632	29.99125684	0.343610144	0.469840969	0.731332869	0.464575858	Pla2g6
44	ENSMUSG00000001157	34.0946865	-0.22369454	0.306452634	-0.729948171	0.465421866	Gmcl1
1259	ENSMUSG00000024969	11.20323693	0.301636204	0.413439297	0.729577973	0.46564819	Mark2
2928	ENSMUSG00000039990	10.50479811	0.349063464	0.478634933	0.729289569	0.465824551	Edrf1
345	ENSMUSG00000010307	14.50366628	-0.497348187	0.682038352	-0.729208534	0.465874112	Tmem86a
3048	ENSMUSG00000041358	10.60863156	-0.388870959	0.533985902	-0.728241996	0.466465462	Nutm1
3249	ENSMUSG00000045822	37.05677284	-0.238483464	0.328651013	-0.725643478	0.46805736	Zswim3
3062	ENSMUSG00000041605	13.94722821	0.31752752	0.438000748	0.724947438	0.468484277	Inava
815	ENSMUSG00000021357	16.32804013	-0.267720881	0.36957223	-0.724407462	0.46881562	Exoc2
214	ENSMUSG00000005510	20.99865194	-0.257417631	0.355364621	-0.724376078	0.468834882	Ndufs3
868	ENSMUSG00000021768	31.30784554	0.361093493	0.498551697	0.724284953	0.468890813	Dusp13
2306	ENSMUSG00000032580	22.12560129	-0.344027072	0.475024641	-0.724229951	0.468924574	Rbm5
2953	ENSMUSG00000040312	35.91076507	-0.627128828	0.866128324	-0.724059946	0.469028933	Cchcr1
2529	ENSMUSG00000035754	11.56756948	-0.289967483	0.400821229	-0.723433444	0.46941363	Wdr18
3674	ENSMUSG00000057116	25.78823898	0.413571286	0.571915233	0.723133889	0.469597631	Semp2l2a
3764	ENSMUSG00000059796	51.05830907	-0.300674473	0.415985413	-0.722800521	0.469802447	Eif4a1
2580	ENSMUSG00000036372	25.25347826	0.323064614	0.447332854	0.722201848	0.470170387	Tmem258
99	ENSMUSG00000002413	13.43615897	0.254314862	0.352274688	0.721922041	0.470342409	Braf
2237	ENSMUSG00000032185	12.77040929	0.577526065	0.800005571	0.721902554	0.470354391	Carm1
1829	ENSMUSG00000029048	19.2777001	0.240534208	0.333692068	0.720826866	0.471016044	Rer1
3309	ENSMUSG00000047213	19.94769987	-0.265472143	0.368692722	-0.720036298	0.471502647	Ythdf3
3210	ENSMUSG00000044934	11.47662723	-0.367132866	0.509942976	-0.719948864	0.471556481	Zfp367
3566	ENSMUSG00000053519	16.95332835	0.383197342	0.532453523	0.719682236	0.471720666	Kcnip1
81	ENSMUSG00000002102	95.31169211	0.198206347	0.27544114	0.719596014	0.471773767	Psmc3
3956	ENSMUSG00000067028	25.97037513	0.58329782	0.81111516	0.719130709	0.472060388	Cntnap5b
2014	ENSMUSG00000030376	12.38719381	-0.357040037	0.496523634	-0.719079643	0.47209185	Slc8a2
346	ENSMUSG00000010342	37.77980989	0.224714801	0.312643077	0.718758282	0.472289866	Tex14
597	ENSMUSG00000020076	12.48282932	-0.355939068	0.495479728	-0.718372615	0.472527567	Ddx50
1375	ENSMUSG00000025982	104.2201111	-0.316010484	0.441268299	-0.716141369	0.473904062	Sf3b1
2119	ENSMUSG00000031487	17.49231947	-0.254114933	0.355186235	-0.715441387	0.474336347	Brf2
3806	ENSMUSG00000061111	22.07227468	-0.22314775	0.311942949	-0.715347951	0.474394065	Mcrip1
2968	ENSMUSG00000040472	13.39215079	0.382914571	0.535365183	0.715239958	0.474460782	Rabggta
1515	ENSMUSG00000026977	19.11662475	-0.226376388	0.316647558	-0.714915946	0.474660983	Marchf7
4437	ENSMUSG00000101053	59.13451977	-0.327841574	0.459624777	-0.713280898	0.475671955	Gm20815
3689	ENSMUSG00000057531	14.43419638	0.241422202	0.338673331	0.712846805	0.475940559	Dtnbp1
3341	ENSMUSG00000047777	62.40782791	-0.203885401	0.286268642	-0.712217028	0.476330394	Phf13
2609	ENSMUSG00000036752	24.18937701	0.401076064	0.563282026	0.712034194	0.476443602	Tubb4b
1464	ENSMUSG00000026701	18.50794097	0.36469847	0.512260927	0.711938879	0.476502625	Prdx6
3032	ENSMUSG00000041144	22.89368956	0.321958441	0.452434147	0.71161393	0.476703879	Dnah7b
663	ENSMUSG00000020455	12.51694617	0.293605018	0.412722245	0.711386462	0.476844786	Trim11
1221	ENSMUSG00000024687	40.25969986	0.316248364	0.445010571	0.7106536	0.47729892	Osbp
4247	ENSMUSG00000081214	32.8620304	0.198579486	0.279615708	0.710187164	0.47758808	Rpl35a-ps2
3494	ENSMUSG00000051455	37.64824946	0.297038021	0.418513776	0.709744908	0.477862338	Meioc
4188	ENSMUSG00000078126	34.20888947	-0.205122082	0.289267656	-0.709108253	0.478257302	Rpl23a-ps3
4551	ENSMUSG00000118662	14.95735078	0.283525064	0.399943658	0.708912514	0.478378769	Tctn2
4320	ENSMUSG00000091114	15.74888246	-0.293426307	0.414258556	-0.70831683	0.478748528	Gm3138
18	ENSMUSG00000000552	27.98433144	0.293377848	0.414297001	0.708134133	0.478861965	Zfp385a
2657	ENSMUSG00000037174	39.78344188	-0.259071562	0.366265092	-0.707333478	0.479359266	Elf2
2143	ENSMUSG00000031592	34.49858403	-0.305252749	0.431644	-0.707186361	0.479450673	Pcm1
1927	ENSMUSG00000029647	10.52894915	0.503536638	0.712090297	0.707124702	0.479488987	Pan3
4126	ENSMUSG00000073640	44.56893633	-0.33337748	0.47151865	-0.707029255	0.479548298	Rpl27-ps3
2314	ENSMUSG00000032637	111.6175284	-0.205454081	0.290671549	-0.706825562	0.479674887	Atxn2l
3673	ENSMUSG00000057113	75.50574545	-0.347187302	0.491202067	-0.706811566	0.479683586	Npm1
2576	ENSMUSG00000036323	15.89734203	-0.275414729	0.389704708	-0.706726717	0.479736323	Srp72
336	ENSMUSG00000009863	30.70447244	0.252843555	0.35784178	0.706579191	0.479828024	Sdhb
3549	ENSMUSG00000053046	22.37061794	0.281571972	0.398674342	0.706270614	0.480019864	Brsk2
2778	ENSMUSG00000038489	9.435441301	0.293602031	0.415954205	0.705851816	0.480280295	Polr2l
3409	ENSMUSG00000049686	17.67484423	0.338865135	0.480161631	0.70573139	0.480355196	Orai1
1974	ENSMUSG00000030059	17.52682063	-0.262126806	0.371443738	-0.7056972	0.480376463	Tmf1
2577	ENSMUSG00000036352	13.09225748	0.299947953	0.425514011	0.704907347	0.480867898	Ubac1
354	ENSMUSG00000010721	12.96546836	0.309517641	0.439167647	0.70478243	0.480945644	Lmbr1
3551	ENSMUSG00000053094	12.4887934	0.292041346	0.414629543	0.704342831	0.481219299	Tmem248
2428	ENSMUSG00000034252	16.71897184	0.269170884	0.382289247	0.704102681	0.48136883	Senp6
2225	ENSMUSG00000032051	19.48338574	-0.298512135	0.424238958	-0.703641496	0.481656063	Fdx1
4224	ENSMUSG00000079396	11.8680581	0.305829573	0.434748377	0.703463403	0.481767006	Gm3411
1387	ENSMUSG00000026102	8.981215653	0.373552895	0.53120647	0.703216012	0.481921142	Inpp1
2103	ENSMUSG00000031256	9.195451906	0.350289795	0.498182025	0.703136158	0.481970901	Cstf2
1846	ENSMUSG00000029130	42.13564835	-0.212042841	0.301789402	-0.70261858	0.482293481	Rnf32
203	ENSMUSG00000005233	23.05744102	-0.284832896	0.405756284	-0.701980247	0.482691482	Spc25
3110	ENSMUSG00000042535	10.59916705	-0.356430987	0.507809746	-0.701898674	0.482742356	Gtpbp1
4494	ENSMUSG00000109293	24.14073091	0.331940824	0.473234378	0.701430072	0.48303466	Dcst2
2067	ENSMUSG00000030779	46.59772245	-0.320285238	0.456691167	-0.70131691	0.483105263	Rbbp6
3659	ENSMUSG00000056708	19.04879157	-0.357103114	0.509691304	-0.700626264	0.483536283	Ier5
1890	ENSMUSG00000029416	10.30127528	-0.393514347	0.56204823	-0.70014338	0.483837767	Slc15a4
2389	ENSMUSG00000033767	26.52356995	0.354461589	0.506377211	0.699995145	0.483930336	Tmem131l
2765	ENSMUSG00000038371	12.26362133	-0.28691885	0.409940323	-0.699903945	0.483987293	Sbf2
3846	ENSMUSG00000062075	18.71712567	-0.406269295	0.580550149	-0.699800519	0.484051891	Lmnb2
4549	ENSMUSG00000118586	23.40016436	-0.275436164	0.39375114	-0.699518392	0.484228123	Gm17695
3340	ENSMUSG00000047766	19.34946406	-0.298028709	0.426082569	-0.699462336	0.484263143	Lrrc49
1449	ENSMUSG00000026578	17.62094102	-0.503991156	0.720612728	-0.699392525	0.484306758	Ccdc181
2901	ENSMUSG00000039715	15.01763347	0.274988502	0.393247013	0.699276771	0.484379081	Dync2i2
3650	ENSMUSG00000056459	14.80499819	-0.283843668	0.406033287	-0.69906502	0.484511398	Zbtb25
3455	ENSMUSG00000050702	11.0578475	0.347877116	0.497862439	0.698741437	0.484713633	4930563M21Rik
1955	ENSMUSG00000029814	21.85357598	0.432498968	0.619179877	0.698502945	0.484862717	Igf2bp3
1916	ENSMUSG00000029550	22.42944514	-0.291225892	0.417086724	-0.698238221	0.485028227	Sppl3
1620	ENSMUSG00000027751	14.00409882	0.300755114	0.430804576	0.698124232	0.485099505	Supt20
3507	ENSMUSG00000051804	22.06878389	0.616374246	0.883151467	0.697925859	0.485223561	Adam6b
1465	ENSMUSG00000026708	22.00895013	-0.268758285	0.385448269	-0.697261622	0.485639081	Cenpl
2437	ENSMUSG00000034312	14.20726016	0.273123642	0.392138633	0.696497664	0.48611722	Iqsec1
2671	ENSMUSG00000037296	21.39253243	-0.343156693	0.492703643	-0.696476874	0.486130235	Lsm1
3586	ENSMUSG00000054302	9.091262116	-0.325765104	0.468313003	-0.69561405	0.486670565	Eapp
4313	ENSMUSG00000090585	20.9987323	-0.484762777	0.697341494	-0.695158372	0.486956057	4933406F09Rik
1454	ENSMUSG00000026605	9.285921677	-0.372792386	0.5367603	-0.694523022	0.487354269	Cenpf
4062	ENSMUSG00000070732	92.85240944	-0.271868666	0.391604937	-0.694242182	0.487530343	Rbm44
4478	ENSMUSG00000107008	70.81528295	0.192201051	0.276943439	0.694008321	0.487676991	Gm2762
4335	ENSMUSG00000092054	8.975630491	-0.326524451	0.470965151	-0.693309154	0.488115559	Kif4-ps
4400	ENSMUSG00000097164	10.05894362	0.366511516	0.529094192	0.692715062	0.488488385	Cep83os
508	ENSMUSG00000018565	17.97155856	0.317332602	0.458249097	0.692489312	0.488630095	Elp5
1016	ENSMUSG00000022657	26.45020051	0.46325564	0.669050775	0.6924073	0.488681583	Cd96
419	ENSMUSG00000015243	18.43335123	-0.652394256	0.943703719	-0.691312583	0.489369126	Abca1
3478	ENSMUSG00000051185	12.08516501	-0.2921047	0.422966465	-0.690609598	0.489810914	Fam174a
3803	ENSMUSG00000061032	44.5552222	-0.305555204	0.443087485	-0.689604682	0.490442822	Rrp1
757	ENSMUSG00000020930	18.63374937	0.253062822	0.367156008	0.68925148	0.490665026	Ccdc103
4288	ENSMUSG00000087044	20.08758855	0.345645226	0.501617522	0.689061308	0.490784687	1700042G15Rik
4562	ENSMUSG00000118936	855.5360526	-0.446119146	0.647782877	-0.688686228	0.491020745	Gm22614
495	ENSMUSG00000018401	21.83168755	0.387863116	0.563436958	0.688387779	0.491208617	Mtmr4
4470	ENSMUSG00000105075	39.05117639	-0.249796213	0.363483185	-0.687229074	0.491938386	Mark1-ps2
2431	ENSMUSG00000034263	8.379721784	-0.311382491	0.45344007	-0.686711456	0.492264577	Ints14
1903	ENSMUSG00000029469	12.35378377	-0.315640691	0.460562499	-0.685337367	0.493131057	Ift81
3261	ENSMUSG00000046173	44.1674061	-0.19440959	0.284091628	-0.684320027	0.493773103	Pabpc6
3219	ENSMUSG00000045078	23.73283063	0.219547304	0.320846713	0.68427475	0.493801688	Rnf216
2945	ENSMUSG00000040212	19.43975113	-0.595009323	0.869659752	-0.68418634	0.493857507	Emp3
2719	ENSMUSG00000037890	72.2816877	-0.264628651	0.386833962	-0.684088463	0.493919306	Wdr19
563	ENSMUSG00000019878	14.70068103	-0.340990037	0.49872988	-0.683716879	0.494153963	Hsf2
251	ENSMUSG00000006304	32.80130027	0.341177887	0.499826345	0.682592845	0.494864157	Arpc2
250	ENSMUSG00000006299	28.65428492	0.20545282	0.301175919	0.682168817	0.49513221	Aamp
3204	ENSMUSG00000044813	11.42364487	0.456174498	0.669279932	0.681589984	0.49549825	Shb
3937	ENSMUSG00000066149	12.24500149	-0.377894364	0.554733054	-0.681218402	0.495733306	Cdc26
911	ENSMUSG00000022018	12.89493452	0.276947532	0.40665002	0.681046398	0.495842132	Rgcc
870	ENSMUSG00000021771	58.71399519	0.171518312	0.251893737	0.680915348	0.495925056	Vdac2
2255	ENSMUSG00000032285	10.16407041	0.454528149	0.667757077	0.680678894	0.496074694	Dnaja4
3671	ENSMUSG00000057069	35.95693655	0.383562928	0.564482525	0.679494779	0.496824415	Ero1b
514	ENSMUSG00000018593	28.31140355	-0.480867871	0.709369382	-0.677880782	0.497847286	Sparc
1042	ENSMUSG00000022828	10.76983358	0.422793021	0.623776085	0.677796137	0.497900961	Gtf2e1
2649	ENSMUSG00000037101	26.45183184	0.282788075	0.41803793	0.676465113	0.498745389	Ttc29
1155	ENSMUSG00000024271	13.36494604	0.376691097	0.55693169	0.676368581	0.49880666	Elp2
4532	ENSMUSG00000115825	8.545179477	0.495426338	0.73265067	0.676210858	0.49890678	Gm49048
2272	ENSMUSG00000032396	38.55796134	0.189903459	0.281203713	0.675323443	0.499470293	Dis3l
2839	ENSMUSG00000039000	14.6683492	-0.253581093	0.37553982	-0.67524422	0.499520617	Ube3c
1253	ENSMUSG00000024937	20.47871114	0.325146948	0.481688396	0.675015115	0.499666162	Ehbp1l1
3543	ENSMUSG00000052833	18.77454866	-0.314910468	0.466528821	-0.675007532	0.499670979	Sae1
4289	ENSMUSG00000087162	16.40271394	0.419986864	0.622399618	0.674786508	0.499811414	Gm14244
3813	ENSMUSG00000061286	51.65971282	0.291657606	0.432314087	0.674642846	0.499902704	Exosc5
4130	ENSMUSG00000073722	17.0589905	0.342102508	0.507223354	0.674461271	0.5000181	4931408C20Rik
3333	ENSMUSG00000047648	40.37366275	0.290892074	0.431306508	0.67444397	0.500029096	Fbxo30
3624	ENSMUSG00000055652	18.8407297	0.280381717	0.415747223	0.674404306	0.500054306	Klhl25
3997	ENSMUSG00000068600	12.10147769	0.381906548	0.566309686	0.674377567	0.500071301	Gml2
3594	ENSMUSG00000054405	32.77031756	-0.259805384	0.3856372	-0.673704153	0.500499421	Dnajc8
1330	ENSMUSG00000025499	9.547235461	-0.328716202	0.488030162	-0.673557144	0.500592907	Hras
1708	ENSMUSG00000028437	14.63420507	-0.327315378	0.486025305	-0.673453366	0.500658907	Ubap1
1160	ENSMUSG00000024294	10.5583275	0.297658872	0.442185825	0.673153355	0.500849733	Mib1
4150	ENSMUSG00000074449	27.67823163	0.346202085	0.514319765	0.673126153	0.500867037	Potefam3a
1241	ENSMUSG00000024843	8.229637645	0.389265786	0.578300238	0.67312057	0.500870589	Chka
58	ENSMUSG00000001524	11.34857924	-0.287581006	0.427274196	-0.673059617	0.500909364	Gtf2h4
212	ENSMUSG00000005470	19.49705367	-0.285509087	0.424290426	-0.672909568	0.501004825	Asf1b
3952	ENSMUSG00000066809	8.379800924	0.520360716	0.774484878	0.671879762	0.501660245	Gm10180
1288	ENSMUSG00000025139	29.79130229	0.203738647	0.303320912	0.671693373	0.501778921	Tollip
3234	ENSMUSG00000045409	9.1843086	0.307351074	0.457834239	0.671315179	0.502019767	Trim39
2728	ENSMUSG00000037949	13.24983381	0.312808007	0.465979776	0.671290951	0.502035198	Ano10
1918	ENSMUSG00000029576	18.26416276	-0.255676818	0.380967638	-0.671124769	0.502141049	Radil
1777	ENSMUSG00000028792	20.71374411	-0.212352891	0.316418128	-0.671114808	0.502147394	Ak2
4209	ENSMUSG00000079020	14.27220427	-0.41603535	0.619963495	-0.671064269	0.502179588	Slc45a4
3076	ENSMUSG00000041809	25.57484689	0.238924211	0.356051364	0.671038606	0.502195936	Efhc1
3448	ENSMUSG00000050565	19.04566714	0.243405361	0.363208521	0.670153223	0.502760119	Tor1aip2
2569	ENSMUSG00000036275	38.65121789	-0.264839996	0.395199573	-0.670142415	0.502767008	9530068E07Rik
3426	ENSMUSG00000049932	31.27673161	0.275077946	0.410893624	0.669462677	0.503200382	H2ax
92	ENSMUSG00000002319	24.22615252	0.340464832	0.508678743	0.669312089	0.503296417	Ipo4
2139	ENSMUSG00000031575	18.88483203	-0.261585947	0.390989058	-0.66903649	0.503472201	Ash2l
337	ENSMUSG00000009941	16.14917407	-0.290224356	0.433981147	-0.668748764	0.503655755	Nxf2
15	ENSMUSG00000000374	12.89920476	-0.267305836	0.399890165	-0.668448136	0.503847577	Trappc10
1244	ENSMUSG00000024855	23.96823204	0.242215391	0.363198908	0.6668946	0.50483946	Pacs1
777	ENSMUSG00000021111	24.86520596	0.187044634	0.281066518	0.665481736	0.505742421	Papola
2716	ENSMUSG00000037876	20.54475473	0.247683746	0.372312433	0.66525779	0.505885624	Jmjd1c
4241	ENSMUSG00000080316	15.69175559	-0.313595647	0.471507119	-0.665092072	0.505991605	Spaca6
1379	ENSMUSG00000026018	17.09882374	0.259054333	0.389886859	0.664434636	0.506412171	Ica1l
874	ENSMUSG00000021810	20.29263161	-0.301455269	0.455327106	-0.662063087	0.507930792	Ecd
4031	ENSMUSG00000069662	10.09857816	-0.3753358	0.567099157	-0.661852157	0.508065976	Marcks
3082	ENSMUSG00000041870	17.73490971	0.246040091	0.371839758	0.661683118	0.508174326	Ankrd13a
490	ENSMUSG00000018293	125.9015894	-0.298091314	0.450689169	-0.661412197	0.508348006	Pfn1
3095	ENSMUSG00000042208	17.68617387	-0.251293362	0.380112849	-0.661101991	0.508546908	Sanbr
1803	ENSMUSG00000028933	10.28395338	0.446334655	0.675258885	0.660983018	0.508623205	Xrcc2
21	ENSMUSG00000000708	12.45927403	0.291148461	0.440831376	0.660453127	0.508963089	Kat2b
2883	ENSMUSG00000039515	53.55819597	-0.221986733	0.336207384	-0.660267273	0.509082328	Ptpa
1933	ENSMUSG00000029661	34.43718552	-0.677236855	1.025953424	-0.660104873	0.509186532	Col1a2
3643	ENSMUSG00000056216	9.933240082	0.306668845	0.464708995	0.659915879	0.509307814	Cebpg
649	ENSMUSG00000020368	10.19778376	0.287221772	0.435364237	0.659727528	0.509428698	Canx
1523	ENSMUSG00000027018	20.65225566	-0.288212326	0.437103654	-0.659368376	0.509659244	Hat1
229	ENSMUSG00000005804	23.33124213	0.296719242	0.450486657	0.658663775	0.5101117	Bloc1s6
2269	ENSMUSG00000032376	13.00207322	0.25097148	0.381383671	0.658055125	0.51050271	Usp3
2763	ENSMUSG00000038323	24.24879077	-0.248755962	0.378694058	-0.65687844	0.511259082	1700066M21Rik
258	ENSMUSG00000006392	10.59488958	0.332468739	0.506342456	0.656608457	0.51143271	Med8
995	ENSMUSG00000022542	25.60278318	0.354754478	0.54034274	0.656536031	0.511479292	Septin12
2179	ENSMUSG00000031807	21.33599337	0.30844861	0.470045602	0.65620997	0.511689035	Pgls
4561	ENSMUSG00000118876	428.0403403	-0.484566311	0.738931115	-0.655766554	0.511974339	Rnu1b1
1571	ENSMUSG00000027429	21.35569561	-0.224062578	0.341707859	-0.655713858	0.512008251	Sec23b
3880	ENSMUSG00000063281	13.5188024	-0.240872702	0.367532071	-0.65537873	0.512223942	Zfp35
1188	ENSMUSG00000024487	18.21411057	0.315212347	0.480981301	0.655352602	0.512240761	Yipf5
1456	ENSMUSG00000026615	12.37970305	-0.422219878	0.644815164	-0.654792103	0.512601615	Eprs
2319	ENSMUSG00000032727	13.71626375	0.265422694	0.405723635	0.65419579	0.512985674	Mier3
4140	ENSMUSG00000074067	63.19154692	0.396305184	0.606045488	0.653919865	0.513163435	Gm10619
2487	ENSMUSG00000035027	50.10024088	0.285310511	0.436473247	0.653672392	0.513322894	Map2k2
3511	ENSMUSG00000051910	19.11661172	0.314344678	0.481668611	0.652616074	0.51400382	Sox6
3235	ENSMUSG00000045435	16.74060569	0.347738875	0.532993436	0.652426187	0.514126275	Tmem60
2346	ENSMUSG00000033075	10.41334746	0.266428008	0.408987741	0.651432748	0.514767176	Senp1
3469	ENSMUSG00000050954	25.32984096	0.264622483	0.406357402	0.651206258	0.514913351	Zfp169
2508	ENSMUSG00000035329	19.53752483	0.241837345	0.371382972	0.651180489	0.514929984	Fbxo33
128	ENSMUSG00000003099	9.456118903	-0.307114732	0.471712972	-0.651062724	0.515005998	Ppp5c
48	ENSMUSG00000001228	23.78000745	-0.258542809	0.39813346	-0.649387291	0.516088076	Uhrf1
2440	ENSMUSG00000034334	11.56850051	-0.264521311	0.408077577	-0.648213294	0.516847004	Fam151b
2546	ENSMUSG00000035992	24.16128044	0.244834258	0.377748476	0.648140955	0.516893787	Fnip1
3358	ENSMUSG00000048120	12.68715797	-0.26300999	0.406284572	-0.647354115	0.517402785	Entpd1
3	ENSMUSG00000000085	11.63624405	0.267672886	0.41371279	0.647001718	0.517630832	Scmh1
2122	ENSMUSG00000031509	24.29779339	0.396703232	0.613219996	0.646918291	0.517684827	Spaca7b
1091	ENSMUSG00000023505	44.78551421	-0.158967231	0.245746061	-0.646876011	0.517712192	Cdca3
1357	ENSMUSG00000025868	10.31715774	-0.288035206	0.445290084	-0.646848461	0.517730025	Higd2a
1631	ENSMUSG00000027823	27.48162038	-0.197226953	0.305072667	-0.646491719	0.517960958	Gmps
2773	ENSMUSG00000038429	20.23442643	0.30315383	0.469302983	0.645966125	0.518301294	Usp5
4110	ENSMUSG00000072940	133.6838635	0.155409056	0.240759375	0.645495346	0.518606233	Gm10443
4397	ENSMUSG00000097071	12.3446279	0.598066765	0.92702231	0.64514819	0.518831157	4930544I03Rik
3364	ENSMUSG00000048400	16.38941876	0.371831076	0.57641431	0.645076068	0.518877892	Prss54
2639	ENSMUSG00000036977	64.05943596	-0.220667721	0.342113176	-0.645013804	0.51891824	Anapc10
3647	ENSMUSG00000056305	14.5208254	0.247613013	0.384067984	0.644711414	0.519114218	Usp39
710	ENSMUSG00000020696	21.46877954	0.53017379	0.822779975	0.644368854	0.519336276	Rffl
497	ENSMUSG00000018425	21.97419748	0.283274419	0.439729286	0.64420185	0.519444552	Dhx40
295	ENSMUSG00000007880	20.02069901	0.321155836	0.49987698	0.642469745	0.520568228	Arid1a
1453	ENSMUSG00000026601	9.852235632	0.283463565	0.442042907	0.641258032	0.521355051	Axdnd1
1982	ENSMUSG00000030120	13.56306361	-0.3746989	0.584539363	-0.641015684	0.521512493	Mlf2
972	ENSMUSG00000022407	11.32808766	0.261448157	0.407929512	0.640915034	0.521577887	Adsl
791	ENSMUSG00000021177	13.19505365	0.336532305	0.525576252	0.640311094	0.52197037	Tdp1
536	ENSMUSG00000019210	10.70152017	-0.264698969	0.41356988	-0.640034446	0.522150206	Atp6v1e1
1774	ENSMUSG00000028788	18.36220674	-0.22506674	0.351754172	-0.639840996	0.522275977	Ptp4a2
930	ENSMUSG00000022142	31.02333278	-0.224760937	0.351316748	-0.639767212	0.522323952	Nup155
11	ENSMUSG00000000305	11.19284789	0.38400227	0.600707012	0.639250521	0.522659971	Cdh4
1983	ENSMUSG00000030122	13.10434002	-0.536667088	0.840099665	-0.638813596	0.522944203	Ptms
2267	ENSMUSG00000032348	12.69296314	-0.372136372	0.583011195	-0.638300559	0.523278048	Gsta4
1380	ENSMUSG00000026019	19.84261027	-0.198021991	0.310509643	-0.637732177	0.523648036	Wdr12
1312	ENSMUSG00000025351	12.78331707	-0.363856876	0.570618231	-0.637653786	0.523699075	Cd63
521	ENSMUSG00000018765	42.98332851	-0.342743944	0.537869749	-0.637224802	0.523978425	Fxr2
2029	ENSMUSG00000030521	9.613296982	-0.385225074	0.60471412	-0.637036677	0.524100953	Mphosph10
424	ENSMUSG00000015461	11.2666518	-0.259310587	0.407087491	-0.636989819	0.524131475	Atf6b
3315	ENSMUSG00000047284	22.69727199	0.225969138	0.354746604	0.63698746	0.524133012	Neurl4
1015	ENSMUSG00000022656	99.88725725	0.387230719	0.608405684	0.63646795	0.524471464	Nectin3
4382	ENSMUSG00000096036	11.23903376	-0.346390544	0.544309469	-0.6363853	0.52452532	Gm21778
173	ENSMUSG00000004347	18.04884266	-0.2570926	0.404136136	-0.636153457	0.524676406	Pde1c
2438	ENSMUSG00000034317	44.59410403	-0.28607891	0.450184557	-0.635470287	0.52512174	Trim59
1962	ENSMUSG00000029875	81.22049217	-0.210710111	0.331827058	-0.634999786	0.525428555	Ccdc184
483	ENSMUSG00000018001	11.16040289	0.249584773	0.393163217	0.634812112	0.525550963	Cyth3
4181	ENSMUSG00000075600	10.53943847	0.29390208	0.463162549	0.634554933	0.525718729	Zc3h3
2734	ENSMUSG00000037992	25.15408765	0.187057508	0.294846734	0.634422857	0.525804897	Rara
3991	ENSMUSG00000068349	14.59209409	0.313841367	0.494838178	0.634230302	0.525930535	Gml
1425	ENSMUSG00000026384	16.7436788	0.265938011	0.419590592	0.63380356	0.526209029	Ptpn4
718	ENSMUSG00000020720	15.95979233	-0.304557693	0.48067082	-0.633609696	0.526335571	Psmd12
1132	ENSMUSG00000024137	10.7512543	-0.341275334	0.538678086	-0.633542264	0.526379591	E4f1
803	ENSMUSG00000021243	11.32421448	0.269893791	0.426045463	0.633485894	0.526416389	Fcf1
3926	ENSMUSG00000064363	203.0141055	0.270083682	0.426500492	0.633255265	0.526566961	mt-Nd4
1046	ENSMUSG00000022855	28.98546837	-0.202928286	0.320731224	-0.632705116	0.526926228	Senp2
2964	ENSMUSG00000040428	8.640318234	0.351252342	0.555307371	0.632536791	0.527036175	Plekha4
4467	ENSMUSG00000104705	36.84603325	0.429484576	0.679939613	0.631651058	0.527614915	4930405N21Rik
2507	ENSMUSG00000035325	19.62360313	0.374622675	0.593126876	0.631606305	0.527644166	Sec31a
3865	ENSMUSG00000062825	49.64567495	0.157235219	0.249104353	0.631202212	0.527908316	Actg1
2812	ENSMUSG00000038759	73.87301679	-0.255984998	0.405801877	-0.630812749	0.528162966	Nup205
1400	ENSMUSG00000026209	34.01933219	0.211378753	0.336067854	0.628976413	0.529364498	Dnpep
1138	ENSMUSG00000024180	43.73771379	0.542340292	0.862961764	0.628463873	0.529700106	Pgap6
1458	ENSMUSG00000026643	20.49530242	-0.21239435	0.338023154	-0.628342608	0.529779525	Nmt2
778	ENSMUSG00000021112	15.81210644	-0.245271438	0.390557636	-0.628003181	0.530001856	Pals1
1038	ENSMUSG00000022800	133.8052526	-0.247887195	0.395101884	-0.627400689	0.530396616	Fyttd1
3977	ENSMUSG00000067872	13.60133191	-0.233730715	0.372647738	-0.627216246	0.530517495	Ccdc87
1705	ENSMUSG00000028427	21.45693991	0.459193066	0.732151015	0.627183541	0.530538931	Aqp7
4526	ENSMUSG00000115422	10.73182429	0.263397762	0.42039544	0.626547619	0.530955813	4930452G13Rik
3416	ENSMUSG00000049775	79.43044875	-0.325181728	0.51914822	-0.626375504	0.531068673	Tmsb4x
3878	ENSMUSG00000063273	19.36162854	0.302750921	0.48413662	0.625341914	0.531746677	Naa15
2474	ENSMUSG00000034801	79.93684244	-0.148033259	0.236818675	-0.625091155	0.531911233	Sos2
3617	ENSMUSG00000055319	88.44310743	-0.263791634	0.422217459	-0.624776708	0.53211762	Sec23ip
2710	ENSMUSG00000037710	21.30739466	-0.189528897	0.303930795	-0.623592281	0.532895381	Cisd1
2169	ENSMUSG00000031765	162.0475405	0.22718275	0.364527313	0.62322559	0.533136288	Mt1
2127	ENSMUSG00000031529	23.72186751	0.41895307	0.672313868	0.623151016	0.533185288	Tnks
2994	ENSMUSG00000040729	19.02421305	-0.317264819	0.509283504	-0.622963078	0.533308785	Cep126
2088	ENSMUSG00000030994	17.48873906	0.432413175	0.694648095	0.622492422	0.533618125	D7Ertd443e
3124	ENSMUSG00000042650	15.48360424	-0.34390325	0.552837323	-0.622069523	0.533896154	Alkbh5
3538	ENSMUSG00000052713	36.34132232	-0.266916472	0.429410846	-0.621587635	0.534213054	Zfp608
1755	ENSMUSG00000028678	50.76295088	0.259759365	0.417985199	0.621455894	0.534299706	Kif2c
1032	ENSMUSG00000022774	10.20419465	-0.341620193	0.550316927	-0.620769916	0.53475102	Ncbp2
3781	ENSMUSG00000060260	25.80267141	0.437828488	0.705417111	0.620666102	0.534819338	Pwwp2b
4446	ENSMUSG00000101505	11.87791103	0.374913231	0.604054519	0.620661247	0.534822532	1700109G14Rik
351	ENSMUSG00000010608	15.78896724	0.290362917	0.467864902	0.620612736	0.534854458	Rbm25
3380	ENSMUSG00000048701	28.26254194	0.350056367	0.564326159	0.620308596	0.535054637	Ccdc6
1240	ENSMUSG00000024837	11.64960875	0.502377623	0.809886906	0.620305896	0.535056414	Dmrt1
3195	ENSMUSG00000044566	62.74513352	-0.177044936	0.285448988	-0.620233189	0.535104274	Cage1
3807	ENSMUSG00000061119	11.78980085	-0.256017966	0.412940768	-0.61998714	0.535266254	Prcp
186	ENSMUSG00000004798	11.52515108	0.238884499	0.385322101	0.619960543	0.535283765	Ulk2
3967	ENSMUSG00000067377	15.7173661	0.628862503	1.016360276	0.618739749	0.53608782	Tspan6
2100	ENSMUSG00000031167	11.66858775	0.327648164	0.529731009	0.618517999	0.536233937	Rbm3
1381	ENSMUSG00000026020	21.75827204	-0.373876284	0.604888113	-0.618091637	0.536514935	Nop58
2398	ENSMUSG00000033904	11.22552078	0.323851321	0.524469686	0.617483392	0.536915932	Ccp110
2900	ENSMUSG00000039704	24.07595877	0.390310936	0.632295766	0.617291713	0.537042332	Lmbrd2
3996	ENSMUSG00000068523	37.39017898	0.182891321	0.296286671	0.617278261	0.537051203	Gng5
3480	ENSMUSG00000051234	42.83751062	-0.190783372	0.309079871	-0.617262366	0.537061686	Rnf7
3079	ENSMUSG00000041841	45.34346	0.204221019	0.330904584	0.617159835	0.537129305	Rpl37
4029	ENSMUSG00000069601	9.260544902	-0.279707444	0.454135692	-0.615911607	0.53795286	Ank3
3576	ENSMUSG00000053897	12.25870229	0.255586798	0.415031145	0.615825585	0.538009639	Slc39a8
1557	ENSMUSG00000027346	9.879398271	-0.363643521	0.591859105	-0.614408932	0.538945135	Gpcpd1
1062	ENSMUSG00000022992	10.24776176	-0.298823553	0.4869798	-0.613626176	0.539462382	Kansl2
2075	ENSMUSG00000030835	11.63605087	-0.289764944	0.473290572	-0.612234769	0.540382441	Nomo1
963	ENSMUSG00000022370	9.22001908	-0.276125405	0.451071782	-0.612154022	0.540435858	Mrpl13
3959	ENSMUSG00000067158	8.726844853	-0.300540176	0.491701121	-0.611225322	0.541050422	Col4a4
1672	ENSMUSG00000028249	23.32195693	-0.245247744	0.402185763	-0.609787235	0.542002759	Sdcbp
3776	ENSMUSG00000060098	38.35363827	0.172719181	0.283748275	0.60870566	0.542719554	Prmt7
3040	ENSMUSG00000041278	9.87864984	-0.265525264	0.436364435	-0.608494282	0.542859697	Ttc1
808	ENSMUSG00000021265	7.715774607	0.541710893	0.890762697	0.608142769	0.543092789	Slc25a29
1318	ENSMUSG00000025393	79.3429083	-0.205713892	0.338557641	-0.607618518	0.543440516	Atp5b
1659	ENSMUSG00000028081	74.10211253	-0.275577444	0.453717616	-0.607376559	0.543601041	Rps3a1
4229	ENSMUSG00000079557	9.495383673	0.337226887	0.555269944	0.607320621	0.543638156	Marchf2
3827	ENSMUSG00000061607	32.12914599	-0.26626638	0.438552161	-0.607148714	0.543752224	Mdc1
2872	ENSMUSG00000039345	22.49664147	0.425380016	0.700693265	0.607084494	0.54379484	Mettl22
1901	ENSMUSG00000029462	11.83603748	-0.285927792	0.471768536	-0.606076435	0.544463998	Vps29
4281	ENSMUSG00000086275	11.54398571	-0.351602472	0.580270674	-0.605928385	0.54456231	1700121C08Rik
3971	ENSMUSG00000067795	26.6968419	0.262756678	0.43379933	0.6057102	0.54470721	4930444P10Rik
2041	ENSMUSG00000030647	26.38390429	-0.247416164	0.408780789	-0.605253895	0.545010311	Ndufc2
3591	ENSMUSG00000054364	14.29769245	-0.359790429	0.595241587	-0.604444376	0.54554824	Rhob
235	ENSMUSG00000005883	18.90793353	-0.225444553	0.373430708	-0.603711875	0.546035218	Spo11
4332	ENSMUSG00000091827	12.62489123	0.274618366	0.45552256	0.602864468	0.546598855	Speer4f2
3407	ENSMUSG00000049659	19.59777607	-0.294907458	0.489498972	-0.602467981	0.54686267	Aftph
3485	ENSMUSG00000051329	17.33020162	0.279147675	0.463404997	0.602383827	0.546918673	Nup160
1735	ENSMUSG00000028581	15.27226672	-0.312082547	0.518438871	-0.601965949	0.547196804	Laptm5
4160	ENSMUSG00000074749	21.83596397	0.263983156	0.438708728	0.601727614	0.547355466	Kiz
2462	ENSMUSG00000034602	10.03054764	0.3995456	0.664412138	0.601352048	0.54760553	Mon2
1027	ENSMUSG00000022757	11.12358136	-0.254622872	0.423516757	-0.601210857	0.547699554	Tfg
2862	ENSMUSG00000039219	11.36936867	0.259623735	0.432281844	0.600589034	0.548113743	Arid4b
729	ENSMUSG00000020792	10.15241325	0.270791205	0.450976218	0.600455621	0.548202629	Exoc7
919	ENSMUSG00000022085	11.69453757	0.499773559	0.833793521	0.599397269	0.548907998	Pebp4
4373	ENSMUSG00000095493	18.05241812	-0.247573535	0.413251147	-0.59908735	0.549114637	A630023A22Rik
145	ENSMUSG00000003421	9.031973113	0.275610399	0.460353931	0.598692398	0.549378028	Nosip
3924	ENSMUSG00000064358	121.8044122	0.252105343	0.422052556	0.597331635	0.550285987	mt-Co3
2708	ENSMUSG00000037692	33.84403885	-0.186389585	0.312077391	-0.59725437	0.550337564	Ahdc1
3595	ENSMUSG00000054452	21.59065934	-0.253185943	0.423986245	-0.59715603	0.550403213	Tle5
3440	ENSMUSG00000050148	9.714285134	-0.337997561	0.566411917	-0.59673455	0.550684621	Ubqln2
2575	ENSMUSG00000036315	23.03696297	0.203078242	0.340323227	0.596721662	0.550693228	Polr1h
3528	ENSMUSG00000052459	22.08485483	-0.26998005	0.452460456	-0.596693141	0.550712273	Atp6v1a
1278	ENSMUSG00000025043	9.66857292	0.518819448	0.870179753	0.596221006	0.551027595	Dusp21
2977	ENSMUSG00000040565	19.52154924	-0.217561583	0.365262312	-0.595631073	0.551421714	Btaf1
1782	ENSMUSG00000028809	24.83754122	-0.357188777	0.599865509	-0.595448099	0.551543982	Srrm1
2087	ENSMUSG00000030987	17.7215955	-0.233791634	0.392702443	-0.595340412	0.551615948	Stim1
1626	ENSMUSG00000027793	181.5721324	-0.152472874	0.256159754	-0.595225722	0.551692599	Ccna1
3484	ENSMUSG00000051306	63.87465382	-0.290063087	0.487748084	-0.594698567	0.55204498	Usp42
1922	ENSMUSG00000029614	89.54522417	-0.270046104	0.45453054	-0.594120924	0.552431237	Rpl6
1338	ENSMUSG00000025575	10.26556036	0.312913283	0.526726823	0.59407129	0.552464433	Cant1
857	ENSMUSG00000021694	9.082186571	0.268608967	0.452172707	0.594040645	0.552484928	Ercc8
2468	ENSMUSG00000034708	13.25948171	-0.564283372	0.951323071	-0.593156404	0.553076486	Grn
2379	ENSMUSG00000033596	17.18537458	0.246203543	0.415284085	0.592855716	0.553277717	Rfwd3
3535	ENSMUSG00000052642	14.25415455	0.290896083	0.490774099	0.592729087	0.553362472	Lypd9
1828	ENSMUSG00000029044	19.96138429	0.400531468	0.67598229	0.592517694	0.553503976	4930584F24Rik
3955	ENSMUSG00000066900	13.75674965	0.298657185	0.504053757	0.592510582	0.553508737	Suds3
380	ENSMUSG00000013663	11.21724467	0.245895335	0.415014474	0.592498215	0.553517016	Pten
4441	ENSMUSG00000101249	49.87700259	0.233970668	0.395098214	0.592183564	0.553727675	Gm29216
1628	ENSMUSG00000027805	18.14472181	0.223174672	0.377008344	0.591962156	0.553875931	Pfn2
2028	ENSMUSG00000030516	12.27363584	-0.261587297	0.442162715	-0.591608672	0.554112665	Tjp1
679	ENSMUSG00000020514	39.01831313	-0.20172412	0.341061901	-0.591458969	0.554212939	Mrpl22
702	ENSMUSG00000020649	22.18028657	-0.323487612	0.547150801	-0.591222038	0.554371659	Rrm2
3018	ENSMUSG00000040952	158.2428701	-0.239387743	0.404940077	-0.591168314	0.554407651	Rps19
4208	ENSMUSG00000078938	20.37750579	0.265656129	0.449375405	0.591167487	0.554408205	Syce3
731	ENSMUSG00000020799	47.50304444	-0.177173456	0.299817765	-0.590937151	0.554562532	Tekt1
2011	ENSMUSG00000030346	14.99956249	-0.232112279	0.392802099	-0.590914049	0.554578012	Rad51ap1
2402	ENSMUSG00000033940	9.096123045	-0.275568927	0.466646435	-0.590530445	0.554835081	Brk1
2899	ENSMUSG00000039703	25.88425771	0.262847675	0.445494324	0.590013521	0.555181585	Nploc4
4295	ENSMUSG00000087495	30.34148591	0.316610844	0.536798157	0.589813583	0.555315635	Gm14152
3151	ENSMUSG00000043415	9.595705202	0.332307812	0.563647536	0.589566689	0.55548119	Otud1
4451	ENSMUSG00000101818	19.73903299	0.444266724	0.753737693	0.589418213	0.555580762	Gm28269
3681	ENSMUSG00000057236	44.5412158	-0.225961728	0.383477497	-0.589243775	0.555697755	Rbbp4
2386	ENSMUSG00000033705	12.19937114	0.338809328	0.576840665	0.587353404	0.556966381	Stard9
3085	ENSMUSG00000041923	28.78293251	0.265186275	0.451542099	0.587290257	0.557008784	Nol4
3687	ENSMUSG00000057406	26.04199953	0.279469111	0.476399182	0.586628025	0.557453557	Nsd2
199	ENSMUSG00000005131	16.10703228	-0.279764916	0.476941082	-0.586581712	0.557484668	4930550C14Rik
1467	ENSMUSG00000026728	45.87105868	-0.474154841	0.808443556	-0.586503334	0.557537322	Vim
4175	ENSMUSG00000075296	9.123727151	0.677492921	1.155271464	0.586436126	0.557582474	Aldh3b2
4091	ENSMUSG00000071650	15.41065397	0.308121615	0.525699476	0.586117409	0.557796618	Ganab
3121	ENSMUSG00000042628	27.90707235	0.370770832	0.632777786	0.585941606	0.557914756	Zfyve1
832	ENSMUSG00000021534	16.02188311	0.367858195	0.628221291	0.585555122	0.558174514	1700001L19Rik
1320	ENSMUSG00000025413	11.99871947	0.244065155	0.417210633	0.584992654	0.558552656	Ttc4
429	ENSMUSG00000015656	20.82482593	-0.3709287	0.634382384	-0.584708387	0.558743814	Hspa8
1233	ENSMUSG00000024776	26.01940694	0.203161327	0.347990179	0.583813392	0.559345867	Stambpl1
3029	ENSMUSG00000041126	14.77982958	0.296545256	0.508755494	0.582883645	0.559971631	H2az2
3387	ENSMUSG00000048922	59.16186299	-0.170967708	0.293375733	-0.582760222	0.560054726	Cdca2
623	ENSMUSG00000020212	31.27057904	0.224650119	0.385582285	0.582625623	0.560145352	Mdm1
176	ENSMUSG00000004393	11.33347991	0.337922883	0.582101875	0.580521895	0.561562726	Ddx56
1085	ENSMUSG00000023286	89.56538	-0.223150074	0.38441338	-0.580495075	0.561580807	Ube2j2
4204	ENSMUSG00000078746	21.8993881	-0.257852378	0.444286061	-0.580374674	0.56166198	Fam205a4
811	ENSMUSG00000021282	30.23313966	0.333757667	0.575451931	0.579992262	0.561919836	Eif5
304	ENSMUSG00000008333	31.36109297	-0.280547072	0.48400656	-0.579634854	0.562160883	Snrpb2
3593	ENSMUSG00000054400	45.08529353	-0.164569118	0.283950106	-0.579570544	0.562204262	Cklf
1052	ENSMUSG00000022889	23.70241336	-0.203796842	0.352046481	-0.578891859	0.562662144	Mrpl39
1097	ENSMUSG00000023913	18.17980417	-0.206948472	0.357853475	-0.57830505	0.563058186	Pla2g7
242	ENSMUSG00000006050	11.0578615	0.257386093	0.44565071	0.577551178	0.563567177	Sra1
3296	ENSMUSG00000046865	12.85461519	-0.356898041	0.619222398	-0.576364876	0.56436858	Fbl
580	ENSMUSG00000019978	88.0990642	-0.147627102	0.256378512	-0.575816987	0.56473889	Epb41l2
2318	ENSMUSG00000032680	49.64590178	-0.202301332	0.351358198	-0.575769496	0.564770994	6820408C15Rik
544	ENSMUSG00000019471	14.06624347	0.226836634	0.394197721	0.575438724	0.564994621	Cdc37
3575	ENSMUSG00000053868	20.18661183	-0.200711311	0.348893049	-0.575280336	0.565101718	Gm5142
4475	ENSMUSG00000106013	16.43204701	0.195326027	0.33961558	0.575138593	0.565197569	4933402J10Rik
159	ENSMUSG00000003868	34.01252915	-0.217523508	0.378506189	-0.574689436	0.565501353	Ruvbl2
2430	ENSMUSG00000034258	15.91808491	0.342183612	0.595739125	0.574384992	0.565707307	Flvcr2
816	ENSMUSG00000021363	24.68282351	0.167377854	0.291416337	0.574359886	0.565724292	Mak
1147	ENSMUSG00000024232	27.94059251	0.180384312	0.314268822	0.573980934	0.565980703	Bambi
2484	ENSMUSG00000034940	19.35994571	-0.364689736	0.63567891	-0.573701172	0.566170035	Synrg
2260	ENSMUSG00000032306	20.20365227	-0.216640216	0.377876382	-0.573309754	0.566434982	Mpi
2151	ENSMUSG00000031651	10.28169326	-0.281819872	0.491570623	-0.573304951	0.566438234	Triml1
13	ENSMUSG00000000346	31.39785952	-0.206412363	0.360079308	-0.573241389	0.566481264	Dazap2
3268	ENSMUSG00000046338	20.96232203	0.214566571	0.374599007	0.572790015	0.56678688	Gpat2
2808	ENSMUSG00000038708	9.871991066	0.310357472	0.541925	0.572694509	0.566851556	Golga4
1912	ENSMUSG00000029504	8.411527342	-0.323867124	0.565603665	-0.572604358	0.566912608	Ddx51
1249	ENSMUSG00000024885	15.26259034	-0.334411081	0.584116129	-0.572507871	0.566977955	Aldh3b1
1786	ENSMUSG00000028826	16.36459294	-0.232538387	0.406240999	-0.572414867	0.567040946	Maco1
3143	ENSMUSG00000043003	11.40857307	0.247131956	0.43234923	0.571602628	0.567591214	Rasef
2080	ENSMUSG00000030878	9.170064101	-0.32151979	0.562931	-0.571153107	0.567895862	Cdr2
3109	ENSMUSG00000042523	15.73601384	-0.225510163	0.394926688	-0.571017786	0.567987587	Dnal1
2020	ENSMUSG00000030421	11.57576601	0.235795868	0.413022049	0.570903825	0.568064838	Uri1
3873	ENSMUSG00000063077	15.48049704	0.22138444	0.388612362	0.569679356	0.568895194	Kif1b
1307	ENSMUSG00000025287	10.26719175	-0.238728904	0.419071983	-0.569660854	0.568907746	Acot9
2133	ENSMUSG00000031546	12.17128828	-0.254562119	0.447410108	-0.568968189	0.569377728	Gins4
303	ENSMUSG00000008200	15.82075594	0.235077946	0.413179843	0.568948242	0.569391265	Fnbp4
3619	ENSMUSG00000055334	21.68046692	0.20979126	0.368906496	0.568684104	0.569570537	Snupn
3393	ENSMUSG00000049154	28.91125124	0.406702052	0.715579294	0.568353578	0.569794905	Fam183b
1567	ENSMUSG00000027406	9.579750034	-0.238685618	0.420417051	-0.567735341	0.57021469	Idh3b
1077	ENSMUSG00000023110	12.45972301	0.263726057	0.465142596	0.566978942	0.570728489	Prmt5
3834	ENSMUSG00000061802	33.01337746	0.295928196	0.522211061	0.566683125	0.570929488	Odad2
4096	ENSMUSG00000071866	38.66774515	-0.168047011	0.296704697	-0.566377993	0.571136851	Ppia
3547	ENSMUSG00000052997	23.65508918	0.267626427	0.47259705	0.566288822	0.571197458	Uba2
1294	ENSMUSG00000025159	11.26513241	0.268304412	0.474073542	0.565955254	0.571424199	Mms19
2355	ENSMUSG00000033237	11.45535708	-0.324168481	0.57296677	-0.56577187	0.571548871	Arid2
3938	ENSMUSG00000066196	29.6647303	-0.165097557	0.291919596	-0.565558323	0.571694066	Spag8
1222	ENSMUSG00000024712	39.15870022	0.329449706	0.582800624	0.565287154	0.571878465	Rfk
647	ENSMUSG00000020361	32.50877819	-0.207619573	0.367604117	-0.564791206	0.572215789	Hspa4
2648	ENSMUSG00000037072	85.62517286	-0.208651321	0.369454893	-0.56475452	0.572240745	Selenof
312	ENSMUSG00000008668	73.36087234	-0.255314851	0.452960203	-0.56365846	0.572986593	Rps18
1815	ENSMUSG00000028976	42.96740513	0.178293276	0.316378186	0.563544783	0.573063975	Slc2a5
4426	ENSMUSG00000100315	21.83232987	0.401413786	0.712680461	0.563245112	0.573267988	1700031P21Rik
2819	ENSMUSG00000038797	71.67885542	-0.269474614	0.478513399	-0.563149569	0.57333304	Zscan2
148	ENSMUSG00000003437	12.68225905	-0.289398782	0.514017457	-0.563013529	0.573425672	Paf1
216	ENSMUSG00000005566	122.0870548	-0.207062976	0.367956547	-0.562737577	0.573613592	Trim28
3365	ENSMUSG00000048411	12.3822579	0.522730288	0.929264377	0.562520528	0.573761421	Gm597
1573	ENSMUSG00000027433	12.24124241	-0.260500651	0.463393517	-0.562158601	0.574007965	Xrn2
699	ENSMUSG00000020633	23.91177925	0.267848094	0.476984302	0.561544884	0.574426141	Dcdc2c
978	ENSMUSG00000022431	9.400339776	0.240182355	0.427874228	0.561338681	0.574566677	Ribc2
751	ENSMUSG00000020903	21.09410727	0.406150634	0.724000696	0.560980999	0.574810491	Stx8
3676	ENSMUSG00000057156	49.39550999	-0.179724622	0.320431355	-0.560883382	0.574877039	Homez
2199	ENSMUSG00000031916	19.94113701	-0.231863861	0.414155729	-0.559847046	0.575583771	Cog8
3863	ENSMUSG00000062732	59.85093829	0.168725663	0.301461117	0.559692952	0.57568889	Lypd4
992	ENSMUSG00000022533	10.45235711	0.283239561	0.506264356	0.559469687	0.575841213	Atp13a3
330	ENSMUSG00000009596	22.07446867	0.374284068	0.66901236	0.559457628	0.575849441	Taf7l
1536	ENSMUSG00000027177	23.49236472	0.17032568	0.304532842	0.559301515	0.575955961	Hipk3
3156	ENSMUSG00000043483	20.69327114	0.177636164	0.31761597	0.5592797	0.575970847	Gm6863
1990	ENSMUSG00000030213	12.56374758	0.23289578	0.416480448	0.559199791	0.576025376	Atf7ip
1652	ENSMUSG00000028032	12.33416959	-0.356049626	0.63734186	-0.558647797	0.576402113	Papss1
2887	ENSMUSG00000039568	22.33160054	0.211438764	0.378523162	0.55858871	0.576442447	Ubald1
262	ENSMUSG00000006527	15.53361119	0.209788881	0.37558095	0.558571676	0.576454075	Sfmbt1
4182	ENSMUSG00000075700	34.74254553	-0.219562184	0.393204547	-0.558391773	0.576576889	Selenot
1322	ENSMUSG00000025423	60.16433512	0.161910931	0.290117494	0.558087445	0.576784673	Pias2
141	ENSMUSG00000003354	21.59648999	0.169426241	0.303589727	0.558076332	0.576792262	Ccdc65
3447	ENSMUSG00000050526	9.756051112	0.36573901	0.655654293	0.557822947	0.576965292	Mgat4f
368	ENSMUSG00000012443	13.52394523	-0.280431781	0.503192118	-0.557305592	0.577318656	Kif11
1060	ENSMUSG00000022973	10.78772943	-0.369460287	0.663162101	-0.557119121	0.577446044	Synj1
220	ENSMUSG00000005615	15.68685634	0.309774621	0.556288794	0.55685936	0.577623523	Pcyt1a
323	ENSMUSG00000009079	28.08528803	-0.244057743	0.43828901	-0.556842033	0.577635363	Ewsr1
2956	ENSMUSG00000040365	12.96216472	0.241701028	0.434460656	0.556324317	0.577989166	Trim41
1706	ENSMUSG00000028433	29.11239309	-0.264636523	0.475857765	-0.556125258	0.578125229	Ubap2
2032	ENSMUSG00000030544	18.08867278	0.234583401	0.422146344	0.55569213	0.578421337	Mesp1
4012	ENSMUSG00000069184	13.10608197	0.270002753	0.486324528	0.555190491	0.578764372	Zfp72
4370	ENSMUSG00000095413	13.54621247	0.568363472	1.024227768	0.554919023	0.57895005	H2al1e
531	ENSMUSG00000019139	66.58001621	-0.184503643	0.332667792	-0.554618295	0.579155773	Isyna1
3417	ENSMUSG00000049792	56.99683801	0.237915232	0.429046075	0.554521405	0.579222061	Bag5
3351	ENSMUSG00000048003	11.73024904	0.27749269	0.50050692	0.554423284	0.579289195	Catsper4
4454	ENSMUSG00000101939	173.1974177	0.296927586	0.535739217	0.554239033	0.579415268	Gm28438
3919	ENSMUSG00000064341	416.847694	0.23440256	0.422972509	0.554179184	0.579456223	mt-Nd1
2456	ENSMUSG00000034543	24.08927764	-0.242474248	0.438127013	-0.553433685	0.579966478	Morc2a
358	ENSMUSG00000011179	62.8291921	0.22712472	0.410531977	0.553244894	0.580095729	Odc1
765	ENSMUSG00000021012	19.72149341	0.182215988	0.329458656	0.553076948	0.580210721	Zc3h14
2220	ENSMUSG00000032026	48.16980009	0.175831027	0.318092643	0.55276672	0.58042316	Rexo2
163	ENSMUSG00000004056	19.52878712	0.187378117	0.338990561	0.552753199	0.580432419	Akt2
2001	ENSMUSG00000030286	11.75656898	-0.251653965	0.45584286	-0.552062975	0.580905208	Emc3
996	ENSMUSG00000022543	29.94993968	0.166581624	0.301873103	0.551826652	0.581067125	Dnaaf8
2733	ENSMUSG00000037979	86.78001396	0.293198001	0.531325289	0.551823916	0.581069	Ccdc92
3630	ENSMUSG00000055833	10.21373109	0.391749935	0.71066872	0.55124128	0.581468286	1700034H15Rik
3539	ENSMUSG00000052738	23.51624785	0.25259798	0.458504268	0.550917403	0.581690297	Suclg1
1622	ENSMUSG00000027778	16.65798671	-0.224797326	0.408462709	-0.55034969	0.582079549	Ift80
560	ENSMUSG00000019854	12.76215467	-0.270627333	0.491740114	-0.550346259	0.582081901	Reps1
4000	ENSMUSG00000068747	15.13354431	-0.440157755	0.800625906	-0.549767066	0.58247915	Sort1
4230	ENSMUSG00000079562	51.33266717	-0.241517218	0.439799995	-0.549152389	0.582900875	Maea
4030	ENSMUSG00000069631	12.5237322	0.230417982	0.419660067	0.549058631	0.582965214	Strada
3042	ENSMUSG00000041298	13.15778947	-0.252734859	0.460410659	-0.548933555	0.58305105	Katnal1
614	ENSMUSG00000020171	21.62236648	-0.209391961	0.381618652	-0.548694253	0.583215291	Yeats4
3884	ENSMUSG00000063415	20.92031121	-0.463715397	0.845150479	-0.548677908	0.58322651	Cyp26b1
2250	ENSMUSG00000032264	14.7219877	-0.229830762	0.419582186	-0.54776101	0.583856014	Zw10
1304	ENSMUSG00000025239	11.17517362	0.24219344	0.442704862	0.54707653	0.584326156	Limd1
3168	ENSMUSG00000043940	21.68874378	0.300435789	0.549230165	0.547012543	0.584370115	Wdfy3
1417	ENSMUSG00000026313	10.44076921	0.30286237	0.553766688	0.546913306	0.584438294	Hdac4
829	ENSMUSG00000021499	13.12466172	-0.218605492	0.399720848	-0.546895397	0.584450598	Catsper3
3998	ENSMUSG00000068663	10.00676432	0.243238882	0.444792647	0.546859045	0.584475575	Clec16a
1095	ENSMUSG00000023868	12.47936048	-0.239518401	0.438034414	-0.546802701	0.584514288	Pde10a
1069	ENSMUSG00000023027	12.47743996	0.208432877	0.381250126	0.546709004	0.584578667	Atf1
4309	ENSMUSG00000090457	21.81387671	0.342578185	0.626670595	0.54666389	0.584609667	4930571K23Rik
2590	ENSMUSG00000036529	22.18625278	0.254019852	0.46471349	0.54661605	0.58464254	Sbf1
1309	ENSMUSG00000025290	202.2903142	-0.174769249	0.319919121	-0.546291978	0.58486525	Rps24
2897	ENSMUSG00000039686	9.213131185	-0.249916954	0.457626462	-0.546115609	0.584986471	Zer1
1440	ENSMUSG00000026511	12.53466124	-0.250665045	0.459917816	-0.545021384	0.58573881	Srp9
3414	ENSMUSG00000049760	26.98309504	0.311521726	0.571670461	0.544932348	0.585800047	Micos13
3139	ENSMUSG00000042810	24.43555909	0.173722354	0.318961613	0.544649723	0.58599445	Krba1
3077	ENSMUSG00000041815	18.08445474	0.220348046	0.404806457	0.544329376	0.586214835	Poldip3
2993	ENSMUSG00000040725	97.13550839	-0.223462653	0.410974094	-0.543739024	0.586621074	Hnrnpul1
1028	ENSMUSG00000022760	15.29605906	0.20239062	0.372246166	0.54370102	0.586647231	Thap7
4297	ENSMUSG00000087561	10.97242266	0.493731845	0.908443395	0.54349214	0.586791001	Gm11608
2328	ENSMUSG00000032846	23.77085071	0.218249227	0.402126567	0.542737647	0.587310449	Zswim6
1272	ENSMUSG00000025025	10.35845869	-0.302437029	0.55757413	-0.54241582	0.587532084	Mxi1
4573	ENSMUSG00000119895	603.4240468	-0.349473709	0.644756655	-0.542024198	0.587801836	Gm22513
2146	ENSMUSG00000031622	44.91892127	0.191589744	0.353489995	0.541994815	0.587822078	Sin3b
3192	ENSMUSG00000044502	14.19215897	0.239462101	0.442017242	0.541748327	0.587991893	Bod1
4394	ENSMUSG00000096753	21.92842805	-0.225001499	0.415456068	-0.541577117	0.58810986	Fam181a
1406	ENSMUSG00000026239	72.32599325	-0.174026587	0.321350406	-0.541547742	0.5881301	Pde6d
310	ENSMUSG00000008540	10.12934754	-0.398282995	0.735716841	-0.541353647	0.58826385	Mgst1
3936	ENSMUSG00000066037	9.885798835	-0.293428223	0.542297449	-0.541083538	0.588450004	Hnrnpr
2667	ENSMUSG00000037278	90.34855447	-0.135740345	0.251121145	-0.540537295	0.588826548	Tmem97
154	ENSMUSG00000003721	22.68456945	-0.198309593	0.367067667	-0.540253502	0.58902222	Insig2
1026	ENSMUSG00000022752	24.44515622	-0.15792275	0.292369708	-0.540147444	0.589095354	Tomm70a
2307	ENSMUSG00000032594	15.97907602	-0.194262625	0.359778613	-0.539950452	0.589231203	Ip6k1
2736	ENSMUSG00000037997	12.03613618	0.274568429	0.508973888	0.539454843	0.589573048	Parp11
2107	ENSMUSG00000031349	9.445095036	0.267577438	0.496202548	0.539250432	0.589714066	Nsdhl
113	ENSMUSG00000002733	12.93098011	0.355413153	0.659676369	0.538768963	0.590046282	Plekha3
1499	ENSMUSG00000026894	29.55137812	0.207277025	0.385049722	0.53831236	0.59036142	Morn5
366	ENSMUSG00000012211	47.99427601	0.269680703	0.501082022	0.538196724	0.590441242	Tex22
2911	ENSMUSG00000039801	14.74524345	0.252202228	0.468706538	0.538081309	0.590520916	Cplane1
3240	ENSMUSG00000045573	9.561476598	0.3474681	0.64661873	0.537361638	0.591017836	Penk
2361	ENSMUSG00000033319	31.32738933	-0.267390078	0.498321847	-0.536581087	0.591557011	Fem1c
637	ENSMUSG00000020283	12.93404904	-0.263490512	0.49142086	-0.536180967	0.591833486	Pex13
1669	ENSMUSG00000028182	41.3232602	0.329649194	0.615492985	0.535585624	0.592244966	Lrriq3
703	ENSMUSG00000020650	25.96653573	0.165204452	0.309141279	0.534397906	0.593066268	Bcap29
4007	ENSMUSG00000069083	40.78741543	-0.210377385	0.393675443	-0.53439296	0.593069688	Gm10259
1832	ENSMUSG00000029064	30.66337623	-0.205769053	0.385156571	-0.534247806	0.593170098	Gnb1
1563	ENSMUSG00000027378	22.87386685	-0.20760744	0.388762615	-0.534021102	0.593326935	Nphp1
3134	ENSMUSG00000042729	12.23105557	0.21389394	0.400577853	0.533963467	0.59336681	Wdr74
1910	ENSMUSG00000029502	9.671594331	-0.242296476	0.454272544	-0.533372486	0.593775759	Golga3
1506	ENSMUSG00000026926	13.66271972	-0.228701163	0.428874037	-0.53325952	0.593853945	Pmpca
1613	ENSMUSG00000027699	22.36528582	-0.251801441	0.472218699	-0.53323056	0.59387399	Ect2
402	ENSMUSG00000014769	39.95853427	0.280498694	0.526539186	0.532721402	0.594226448	Psmb1
2811	ENSMUSG00000038756	65.83346329	-0.327479828	0.61534	-0.532193305	0.594592119	Ttll6
2251	ENSMUSG00000032274	70.11754929	0.252388914	0.474273855	0.532158606	0.59461615	Cyp19a1
2265	ENSMUSG00000032330	107.1552095	0.306211278	0.575454607	0.532120648	0.594642437	Cox7a2
2278	ENSMUSG00000032417	26.49572583	-0.171965009	0.323791609	-0.531097792	0.595351014	Rwdd2a
3645	ENSMUSG00000056234	35.50691204	-0.164448226	0.309714286	-0.530967519	0.595441288	Ncoa4
2343	ENSMUSG00000033054	10.48322038	0.425025443	0.800583136	0.530894824	0.595491664	Npat
505	ENSMUSG00000018548	24.56618811	0.18942513	0.357132505	0.530405739	0.595830648	Trim37
767	ENSMUSG00000021037	15.31418033	-0.286201228	0.539615948	-0.530379484	0.595848847	Ahsa1
2036	ENSMUSG00000030603	12.32510505	-0.328266456	0.618958788	-0.530352686	0.595867424	Psmc4
2568	ENSMUSG00000036270	91.02224762	-0.232242061	0.438111812	-0.530097694	0.596044198	Edc4
4548	ENSMUSG00000118559	9.581210067	-0.232772973	0.439152245	-0.53005074	0.596076751	A930007A09Rik
3993	ENSMUSG00000068396	75.20525698	-0.158605654	0.299305362	-0.529912503	0.596172597	Rpl34-ps1
3536	ENSMUSG00000052681	12.68428824	-0.317591902	0.599785961	-0.529508729	0.596452591	Rap1b
421	ENSMUSG00000015363	11.21205973	0.2739203	0.517335225	0.529483179	0.59647031	Trabd
2007	ENSMUSG00000030323	29.28387242	-0.203239429	0.384057739	-0.529189776	0.596673808	Ift122
610	ENSMUSG00000020152	9.528542065	-0.253565126	0.479510299	-0.528800167	0.596944082	Actr2
2877	ENSMUSG00000039449	16.18098887	0.224503343	0.424659851	0.528666278	0.597036974	Prpf18
1800	ENSMUSG00000028923	13.77180377	0.279924481	0.529502055	0.528656082	0.597044049	Necap2
1767	ENSMUSG00000028753	14.47278367	0.389670138	0.737488008	0.52837488	0.597239169	Vwa5b1
2668	ENSMUSG00000037279	12.85924089	-0.202703046	0.383636584	-0.528372564	0.597240776	Ovol2
2859	ENSMUSG00000039202	34.38492976	0.164173601	0.311175286	0.527592029	0.597782527	Abhd2
4127	ENSMUSG00000073643	47.15319366	0.355076184	0.673270144	0.52739036	0.597922536	Wdfy1
4403	ENSMUSG00000097494	9.748799146	0.37662957	0.714646163	0.527015452	0.598182858	4933406C10Rik
4480	ENSMUSG00000107073	8.67472861	0.556005816	1.055445731	0.526797162	0.598334454	4930428D20Rik
587	ENSMUSG00000020021	17.19776587	-0.281785569	0.53495306	-0.526748214	0.598368449	Fgd6
2185	ENSMUSG00000031827	10.13496627	-0.261663498	0.496844747	-0.526650427	0.598436367	Cotl1
2703	ENSMUSG00000037646	14.53666011	0.261085063	0.49591183	0.526474763	0.598558382	Vps13b
4084	ENSMUSG00000071415	50.85801886	0.249263692	0.473467365	0.526464357	0.598565611	Rpl23
1546	ENSMUSG00000027286	11.03450144	0.327617298	0.622455006	0.526330891	0.598658323	Lrrc57
656	ENSMUSG00000020412	11.39375854	-0.218670113	0.415469879	-0.526320014	0.59866588	Ascc2
1794	ENSMUSG00000028886	11.00112152	0.256872721	0.488102155	0.52626836	0.598701763	Eya3
3011	ENSMUSG00000040875	53.86106324	0.228263757	0.433987336	0.525968704	0.598909952	Osbpl10
2755	ENSMUSG00000038187	85.32811971	-0.187625948	0.356914687	-0.525688505	0.599104652	Btbd10
1627	ENSMUSG00000027799	13.02429236	0.27443184	0.522108577	0.525622164	0.599150754	Nbea
2653	ENSMUSG00000037143	16.46293952	0.279495221	0.531838036	0.52552695	0.599216924	Cfap61
1466	ENSMUSG00000026712	11.28876101	0.468979168	0.892446122	0.525498577	0.599236642	Mrc1
2167	ENSMUSG00000031755	20.91507396	-0.176213347	0.335414424	-0.525360075	0.599332903	Bbs2
1121	ENSMUSG00000024072	16.97854376	-0.313545515	0.596867126	-0.525318788	0.599361599	Yipf4
4529	ENSMUSG00000115607	22.98233693	0.335468391	0.639134348	0.524879302	0.599667099	Gm2803
42	ENSMUSG00000001151	17.5168468	0.345311075	0.657981949	0.524803266	0.599719961	Pcnt
1323	ENSMUSG00000025428	56.39196764	-0.229820065	0.43858727	-0.524000764	0.600278008	Atp5a1
1541	ENSMUSG00000027222	9.954938201	0.254018653	0.48484452	0.523917756	0.600335744	Pex16
3138	ENSMUSG00000042797	71.4939468	0.424357714	0.810360942	0.523665063	0.60051152	Aqp11
3922	ENSMUSG00000064354	357.0550037	0.185175188	0.353793352	0.523399285	0.600696421	mt-Co2
2273	ENSMUSG00000032397	19.19454388	0.204494517	0.390985412	0.523023392	0.600957975	Tipin
1510	ENSMUSG00000026963	18.56136072	0.282627727	0.540693873	0.52271302	0.601173976	Tmem210
2140	ENSMUSG00000031576	15.57543975	-0.233748738	0.44743533	-0.522419045	0.601378599	Kcnu1
2420	ENSMUSG00000034165	16.28687733	0.349171301	0.668444272	0.522364116	0.601416836	Ccnd3
3719	ENSMUSG00000058446	30.93099189	-0.193146331	0.369855928	-0.522220456	0.601516845	Znrf2
2455	ENSMUSG00000034533	25.85696746	-0.330135528	0.633074208	-0.521479984	0.602032445	Scn10a
1747	ENSMUSG00000028643	34.81833176	0.49070599	0.941212478	0.521355168	0.602119376	Svbp
958	ENSMUSG00000022351	40.72512115	0.20827673	0.399769185	0.520992457	0.602372026	Sqle
665	ENSMUSG00000020457	28.553909	0.190507657	0.36572791	0.52089997	0.602436456	Drg1
4319	ENSMUSG00000091017	29.82832228	-0.429616166	0.824842494	-0.520846306	0.602473842	Garin4
3403	ENSMUSG00000049550	19.30110784	0.250218704	0.480583691	0.520655838	0.602606543	Clip1
3166	ENSMUSG00000043881	10.25858249	-0.270284025	0.51923269	-0.520545085	0.602683713	Kbtbd7
1501	ENSMUSG00000026914	12.44110654	-0.261736725	0.502951509	-0.52040151	0.602783758	Psmd14
2358	ENSMUSG00000033282	9.543998361	0.233448821	0.448987501	0.519945034	0.603101886	Rpgrip1l
4219	ENSMUSG00000079346	13.85823788	0.250325765	0.48146854	0.519921332	0.603118407	1700013D24Rik
2512	ENSMUSG00000035399	49.33363387	-0.126468742	0.243375437	-0.519644643	0.603311277	Oser1
2341	ENSMUSG00000033047	43.65930679	0.19790559	0.380966738	0.519482597	0.603424246	Eif3l
136	ENSMUSG00000003269	21.86946649	0.220520839	0.424600091	0.519361261	0.60350884	Cyth2
1356	ENSMUSG00000025858	19.26021531	-0.183827322	0.354274689	-0.518883588	0.603841923	Get4
4421	ENSMUSG00000100112	15.52138159	-0.247153718	0.476449086	-0.518741091	0.603941303	Gm29258
4119	ENSMUSG00000073411	11.63906251	-0.353302034	0.681309506	-0.518563196	0.60406538	H2-D1
2453	ENSMUSG00000034509	11.46837846	-0.228169857	0.440407702	-0.518087799	0.604397012	Mad2l1bp
696	ENSMUSG00000020612	85.40419487	-0.19636657	0.379171174	-0.5178837	0.604539415	Prkar1a
2530	ENSMUSG00000035759	11.88782593	-0.242145295	0.467666333	-0.51777363	0.604616219	Bbs10
423	ENSMUSG00000015377	25.74685455	0.367153154	0.709309769	0.517620325	0.604723198	Dennd6b
1979	ENSMUSG00000030086	44.89328434	0.164300183	0.317759271	0.517058661	0.60511521	Chchd6
1177	ENSMUSG00000024400	59.74251123	-0.212500262	0.411091434	-0.516917269	0.605213912	Wdr33
3450	ENSMUSG00000050608	57.84023119	0.368345408	0.713081084	0.516554731	0.605467024	Micos10
3030	ENSMUSG00000041130	11.50991188	-0.217816934	0.421675756	-0.516550764	0.605469793	Zfp598
3186	ENSMUSG00000044452	9.545110699	-0.249301159	0.48276664	-0.516400966	0.605574391	Zfp507
643	ENSMUSG00000020315	37.27653935	-0.183946064	0.35623123	-0.516367035	0.605598085	Sptbn1
2017	ENSMUSG00000030410	25.6433395	0.262064328	0.507677459	0.51620241	0.605713047	Dmwd
4145	ENSMUSG00000074212	22.92281304	0.329810445	0.639026295	0.516114044	0.60577476	Dnajb14
448	ENSMUSG00000016528	14.56738435	0.187231521	0.362979695	0.515818169	0.605981412	Mapkapk2
1047	ENSMUSG00000022858	41.98893346	-0.140229838	0.271919788	-0.515702955	0.606061891	Tra2b
3205	ENSMUSG00000044835	8.520996165	0.334328176	0.648802279	0.515300557	0.60634301	Ankrd45
126	ENSMUSG00000003068	14.19860556	0.294852711	0.572547275	0.514984043	0.606564171	Stk11
273	ENSMUSG00000006818	25.94249781	0.199671291	0.38794876	0.514684699	0.606773367	Sod2
2607	ENSMUSG00000036745	40.63499963	0.157146381	0.305387375	0.514580478	0.60684621	Ttll7
2226	ENSMUSG00000032058	30.37808747	0.208056128	0.404522632	0.514325063	0.607024742	Ppp2r1b
2144	ENSMUSG00000031617	11.78201866	0.245161392	0.476831896	0.514146377	0.607149655	Tmem184c
517	ENSMUSG00000018697	25.94009894	-0.268434271	0.522258544	-0.513987324	0.607260853	Aatf
3842	ENSMUSG00000062014	20.49404283	0.179626286	0.349833305	0.513462508	0.607627831	Gmfb
4032	ENSMUSG00000069678	67.21689715	-0.17634106	0.343557726	-0.513279273	0.607755981	Pcgf1
4521	ENSMUSG00000114616	10.57593795	0.289304015	0.563984685	0.51296431	0.607976286	Gm26754
4294	ENSMUSG00000087479	8.939836666	0.41578019	0.810897655	0.512740649	0.608132752	Gm16835
693	ENSMUSG00000020607	9.92400109	-0.245625538	0.479165121	-0.512611472	0.608223127	Lratd1
3091	ENSMUSG00000042133	10.4988122	-0.317945556	0.620336754	-0.512537028	0.608275212	Ppig
131	ENSMUSG00000003135	12.52136778	-0.193444372	0.377475541	-0.512468626	0.608323073	Cnot11
1066	ENSMUSG00000023010	175.8854849	0.155086604	0.303052958	0.511747533	0.608827715	Tmbim6
1270	ENSMUSG00000025019	25.4292974	0.172904387	0.337947029	0.511631624	0.608908848	Lcor
748	ENSMUSG00000020895	11.63655947	0.242345471	0.473731446	0.511567203	0.608953944	Tmem107
2697	ENSMUSG00000037617	28.26640066	-0.17302523	0.338230844	-0.511559585	0.608959277	Spag1
1996	ENSMUSG00000030231	23.12245345	0.165753137	0.324187924	0.511287202	0.609149965	Plekha5
2973	ENSMUSG00000040540	8.333018947	0.488873675	0.956241213	0.511245142	0.609179412	Ctdsp2-ps
3290	ENSMUSG00000046785	10.73634736	0.273485123	0.534940899	0.511243622	0.609180477	Epm2aip1
3167	ENSMUSG00000043909	12.26503068	-0.34572826	0.677109958	-0.510593968	0.609635401	Trp53bp1
468	ENSMUSG00000017428	11.60134785	0.238375908	0.466993334	0.510448204	0.609737493	Psmd11
668	ENSMUSG00000020463	12.91587597	0.205879676	0.404110728	0.509463524	0.610427359	Ppp4r3b
1713	ENSMUSG00000028465	15.69890189	-0.434218369	0.852404704	-0.509404004	0.61046907	Tln1
4168	ENSMUSG00000075000	16.56997582	-0.262403182	0.51545235	-0.509073597	0.610700638	Nrbf2
2676	ENSMUSG00000037390	14.95097204	-0.211080738	0.414637477	-0.509072985	0.610701067	Muc3
701	ENSMUSG00000020639	21.37880554	0.166748938	0.327628559	0.508957273	0.610782174	Pfn4
162	ENSMUSG00000004032	26.6193775	0.316405057	0.622247559	0.508487422	0.611111557	Gstm5
4408	ENSMUSG00000098158	15.6030914	0.767047051	1.509722578	0.508071524	0.611403184	Gm4804
4006	ENSMUSG00000069041	56.66014565	-0.210821984	0.415356094	-0.507569256	0.611755456	Slc25a31
511	ENSMUSG00000018572	12.7931687	0.198718193	0.391909335	0.507051441	0.612118726	Phf23
840	ENSMUSG00000021590	15.72400225	-0.232274369	0.458310224	-0.506805995	0.61229095	Spata9
2795	ENSMUSG00000038612	22.65766917	-0.187330987	0.369938376	-0.506384304	0.612586891	Mcl1
3769	ENSMUSG00000059895	34.00241473	0.368687611	0.728245522	0.506268284	0.612668325	Ptp4a3
2347	ENSMUSG00000033099	10.93260274	-0.253857367	0.501563058	-0.506132506	0.612763632	Nol12
2337	ENSMUSG00000033004	15.82398452	0.181658515	0.359023577	0.505979349	0.612871147	Mycbp2
1276	ENSMUSG00000025038	10.18525117	0.211167882	0.418074864	0.505095857	0.613491511	Efhc2
4283	ENSMUSG00000086583	35.23450099	-0.265484387	0.526024719	-0.50469945	0.613769947	Gm15500
1664	ENSMUSG00000028137	19.1690196	-0.207133775	0.410483661	-0.504609063	0.613833443	Celf3
2153	ENSMUSG00000031682	9.525175817	0.39224718	0.777836695	0.504279604	0.614064908	1700011L22Rik
2759	ENSMUSG00000038274	32.23751314	-0.207089324	0.411021072	-0.503841137	0.614373017	Fau
479	ENSMUSG00000017781	11.71200057	-0.253787892	0.504291067	-0.503256767	0.614783758	Pitpna
1509	ENSMUSG00000026960	22.82529647	-0.186869253	0.371394445	-0.503155755	0.614854769	Arl6ip6
1847	ENSMUSG00000029131	51.77232048	-0.205131261	0.4082546	-0.502459153	0.615344578	Dnajb6
1711	ENSMUSG00000028453	20.95520605	-0.223630366	0.445207924	-0.502305449	0.615452677	Fancg
3016	ENSMUSG00000040929	16.3877174	0.167702087	0.334083754	0.50197618	0.615684276	Rfx3
1212	ENSMUSG00000024608	218.8224221	-0.175072176	0.348814669	-0.501906002	0.615733643	Rps14
4291	ENSMUSG00000087358	11.22499404	0.79323483	1.580572253	0.501865592	0.61576207	4930453H23Rik
1543	ENSMUSG00000027238	25.14442378	0.407237352	0.811578796	0.50178412	0.615819385	Frmd5
1690	ENSMUSG00000028370	11.86307389	0.354207701	0.705963238	0.501736751	0.615852709	Pappa
1169	ENSMUSG00000024360	33.82445781	0.201570875	0.401845766	0.501612539	0.615940098	Etf1
3467	ENSMUSG00000050931	14.16877857	-0.232023086	0.463085022	-0.501037769	0.616344542	Sgms2
1875	ENSMUSG00000029291	13.59824769	0.28670283	0.572436538	0.500846488	0.616479165	Rufy3
666	ENSMUSG00000020460	20.56164289	-0.319722462	0.638409506	-0.500810935	0.616504189	Rps27a
986	ENSMUSG00000022463	19.89427296	-0.31165612	0.622897713	-0.50033274	0.616840804	Srebf2
804	ENSMUSG00000021248	16.08762231	0.177725768	0.355526863	0.499894064	0.617149672	Tmed10
2520	ENSMUSG00000035529	11.40858489	0.220502156	0.441177032	0.499804251	0.617212917	Prdm4
2727	ENSMUSG00000037936	20.42576577	0.192594874	0.385387548	0.499743375	0.617255786	Scarb1
708	ENSMUSG00000020687	16.40314248	-0.169215522	0.338760903	-0.499513139	0.617417933	Cdc27
1629	ENSMUSG00000027806	11.00387766	-0.232663707	0.466098948	-0.499172349	0.617657973	Tsc22d2
277	ENSMUSG00000007041	13.85776649	0.272334647	0.545794129	0.498969543	0.61780084	Clic1
2198	ENSMUSG00000031906	10.98335558	0.250046426	0.501844521	0.498254769	0.618304484	Smpd3
4513	ENSMUSG00000113354	18.73167185	0.245046626	0.491880919	0.498182825	0.618355187	Gm20789
3468	ENSMUSG00000050945	20.99279733	-0.181510847	0.364369632	-0.498150315	0.618378099	Zfp438
851	ENSMUSG00000021670	21.01175533	-0.218422689	0.438626114	-0.497970098	0.618505118	Hmgcr
3313	ENSMUSG00000047257	16.68199761	0.220438165	0.442786522	0.497842989	0.618594713	Prss45
111	ENSMUSG00000002728	37.40629979	0.18190021	0.365411275	0.497795834	0.618627953	Naa20
3602	ENSMUSG00000054808	16.63204374	0.379520695	0.762473625	0.497749276	0.618660772	Actn4
714	ENSMUSG00000020708	19.81335634	-0.191334876	0.384937642	-0.497054211	0.619150823	Psmc5
4404	ENSMUSG00000097638	16.59376565	0.419017465	0.845365153	0.495664463	0.620131164	Carlr
2325	ENSMUSG00000032802	14.40393392	0.336802743	0.67956271	0.495616869	0.620164749	Srxn1
1579	ENSMUSG00000027469	40.65458505	-0.236588582	0.478072548	-0.494880082	0.620684772	Tpx2
788	ENSMUSG00000021147	21.24101072	0.163812406	0.331831776	0.493660997	0.621545615	Wdr37
3706	ENSMUSG00000058186	13.60443388	0.350765003	0.710581403	0.493630992	0.621566809	Zfp980
123	ENSMUSG00000003032	22.14248346	-0.178213378	0.361299127	-0.493257151	0.6218309	Klf4
352	ENSMUSG00000010660	8.975643652	0.225518929	0.457443602	0.492998323	0.622013772	Plcd1
461	ENSMUSG00000017132	15.48457288	0.279093379	0.56615352	0.492964133	0.622037931	Cyth1
1185	ENSMUSG00000024456	19.012955	-0.21816667	0.442900763	-0.492585897	0.622305215	Diaph1
1191	ENSMUSG00000024498	11.45261339	0.217664654	0.442457557	0.491944708	0.622758431	Tcerg1
3152	ENSMUSG00000043421	31.0821082	-0.217006006	0.441284135	-0.491760272	0.622888824	Hilpda
913	ENSMUSG00000022031	11.77553355	0.224879658	0.457403983	0.491643418	0.622971444	Elp3
1151	ENSMUSG00000024248	24.15397411	-0.164120428	0.334078402	-0.491263209	0.623240297	Cox7a2l
2203	ENSMUSG00000031931	9.697035117	0.198285207	0.403925659	0.490895299	0.623500502	Ankrd49
4099	ENSMUSG00000072473	20.4705961	0.462097787	0.941753879	0.49067787	0.623654301	1700024G13Rik
3490	ENSMUSG00000051403	11.59430903	0.209421046	0.427282946	0.490122641	0.624047118	Ppp1r37
984	ENSMUSG00000022453	9.700190693	0.23261634	0.474635303	0.490094896	0.624066749	Naga
1082	ENSMUSG00000023175	92.77843079	0.201273162	0.410701434	0.490071731	0.624083141	Bsg
2165	ENSMUSG00000031753	14.43940573	0.270426426	0.551964218	0.489934705	0.624180104	Cog4
299	ENSMUSG00000007987	13.32874493	0.185209041	0.378076224	0.489872224	0.624224319	Ift22
1857	ENSMUSG00000029174	21.63580698	0.15519152	0.317198165	0.489257308	0.624659541	Tbc1d1
1814	ENSMUSG00000028967	11.59272495	-0.303660076	0.621013398	-0.488975081	0.624859339	Errfi1
2274	ENSMUSG00000032399	76.52257666	-0.320852319	0.656257061	-0.488912558	0.624903604	Rpl4
4440	ENSMUSG00000101234	15.47678622	-0.194010603	0.396843332	-0.488884624	0.624923382	1700007E05Rik
2022	ENSMUSG00000030435	12.42536068	0.33167706	0.678998005	0.488480168	0.625209769	U2af2
1855	ENSMUSG00000029168	13.74535518	0.398653045	0.817262241	0.487790852	0.625697992	Dpysl5
1328	ENSMUSG00000025487	13.67690492	-0.193395558	0.396545805	-0.487700426	0.62576205	Psmd13
2875	ENSMUSG00000039391	9.875495893	-0.227573477	0.466942308	-0.487369581	0.625996446	Ccdc81
4087	ENSMUSG00000071636	45.80630816	0.201401959	0.413326765	0.487270547	0.626066617	Rimbp3
2669	ENSMUSG00000037286	18.50676499	0.246914249	0.506761685	0.48723938	0.626088701	Stag1
2071	ENSMUSG00000030811	14.17279568	-0.189315829	0.388588072	-0.487188988	0.626124409	Fbxl19
2974	ENSMUSG00000040548	27.81595291	0.33431752	0.686433465	0.487035579	0.626233118	Tex2
1367	ENSMUSG00000025935	19.22214995	-0.170427946	0.350241788	-0.486600833	0.626541233	Tram1
837	ENSMUSG00000021578	10.45998177	-0.23509072	0.483210825	-0.486517909	0.626600011	Ccdc127
1636	ENSMUSG00000027879	9.595859906	-0.237771072	0.48882443	-0.486414052	0.626673629	Sec22b
3335	ENSMUSG00000047674	147.167249	-0.184015466	0.378401632	-0.486296704	0.626756816	Pdha2
3431	ENSMUSG00000050050	14.85779964	0.17496454	0.359917381	0.486124174	0.626879129	Ccdc158
2040	ENSMUSG00000030641	16.48036138	0.227759526	0.468618814	0.486023008	0.626950853	Ddias
4216	ENSMUSG00000079299	9.605276478	0.423745479	0.871944735	0.48597745	0.626983154	Klrb1
1263	ENSMUSG00000024975	17.99932334	0.205628074	0.423319156	0.485751876	0.627143098	Pdcd4
443	ENSMUSG00000015994	24.93749399	0.180120768	0.371233869	0.485194868	0.627538122	Fnta
1068	ENSMUSG00000023026	14.30296433	0.215198671	0.443685988	0.485024719	0.627658811	Dip2b
3825	ENSMUSG00000061559	31.76342043	-0.225999717	0.467012071	-0.483926928	0.628437729	Wdr61
3427	ENSMUSG00000049940	19.26591159	-0.164118593	0.339483977	-0.483435461	0.628786574	Pgrmc2
1050	ENSMUSG00000022878	11.91077273	-0.368264754	0.762778903	-0.482793576	0.629242313	Adipoq
3291	ENSMUSG00000046818	14.65442985	0.196154383	0.406402559	0.482660305	0.629336952	Ddit4l
1204	ENSMUSG00000024539	10.16840977	-0.308355058	0.639037241	-0.482530655	0.629429027	Ptpn2
1143	ENSMUSG00000024212	12.98980001	-0.192180381	0.398419083	-0.48235737	0.629552099	Mllt1
3700	ENSMUSG00000057863	63.97316934	-0.200362454	0.415564439	-0.482145331	0.62970271	Rpl36
1293	ENSMUSG00000025156	30.5447796	-0.174849031	0.362728089	-0.482038852	0.629778347	Gps1
438	ENSMUSG00000015932	16.8408557	0.276295212	0.573617558	0.481671468	0.630039348	Dstn
3171	ENSMUSG00000044056	14.69035389	0.241570376	0.502284663	0.480943165	0.630556893	Efcab9
3612	ENSMUSG00000055148	106.6985428	-0.189436083	0.394063637	-0.480724598	0.630712247	Klf2
4210	ENSMUSG00000079022	49.40447553	-0.365958679	0.761591901	-0.480518082	0.630859049	Col22a1
1891	ENSMUSG00000029422	14.45430149	-0.251333368	0.523282747	-0.48030127	0.631013186	Rsrc2
31	ENSMUSG00000001016	22.09540455	0.206169471	0.429652354	0.479851836	0.631332751	Ilf2
2871	ENSMUSG00000039335	29.54493967	0.184087568	0.383754573	0.479701301	0.631439803	Spata16
1045	ENSMUSG00000022841	15.16588672	-0.219796727	0.458327622	-0.479562472	0.631538537	Ap2m1
997	ENSMUSG00000022551	16.35827776	-0.213668616	0.446173505	-0.478891314	0.63201595	Cyc1
2552	ENSMUSG00000036052	22.15118313	-0.177861527	0.371877091	-0.478280409	0.632450638	Dnajb5
3692	ENSMUSG00000057637	17.0349997	-0.185136217	0.387126977	-0.478231246	0.632485626	Prdm2
1166	ENSMUSG00000024346	13.03639569	0.183030291	0.383197006	0.477640191	0.63290632	Pfdn1
2101	ENSMUSG00000031181	16.27042284	0.502004411	1.051894298	0.477238457	0.63319233	Ctag2
3826	ENSMUSG00000061589	19.83027287	0.217473707	0.455747458	0.477180295	0.633233741	Dot1l
2822	ENSMUSG00000038836	24.18106338	0.230567671	0.484452345	0.475934678	0.634120916	Agbl3
3634	ENSMUSG00000055882	19.4294845	0.534295442	1.122743169	0.47588394	0.634157065	Abhd16b
3733	ENSMUSG00000058905	41.85898108	0.270165773	0.567816322	0.475797828	0.634218417	Gm10051
2349	ENSMUSG00000033128	15.62458545	-0.206166421	0.433513449	-0.475570992	0.634380045	Gga1
1999	ENSMUSG00000030276	23.5916339	0.252348541	0.53129634	0.474967589	0.634810075	Ttll3
1493	ENSMUSG00000026867	11.50241639	-0.19328676	0.408002585	-0.473739056	0.635685999	Gapvd1
797	ENSMUSG00000021190	10.23644429	-0.337493359	0.712584408	-0.473618781	0.63577178	Lgmn
2219	ENSMUSG00000032021	10.52529854	-0.200343448	0.423074123	-0.473542194	0.635826406	Crtam
1887	ENSMUSG00000029403	10.25928904	-0.199375873	0.421389631	-0.473139009	0.636114008	Cdkl2
1917	ENSMUSG00000029564	19.71222894	0.166550182	0.352163355	0.472934449	0.636259946	4930519G04Rik
2238	ENSMUSG00000032186	24.83191139	0.344068331	0.727739854	0.472790282	0.636362808	Tmod2
2816	ENSMUSG00000038781	8.516489959	0.496914565	1.051163771	0.472728017	0.636407235	Stap2
3136	ENSMUSG00000042747	13.802027	-0.215780277	0.457346001	-0.471809694	0.637062631	Krtcap2
1904	ENSMUSG00000029471	10.707542	0.220508369	0.467808444	0.471364663	0.637380346	Camkk2
3199	ENSMUSG00000044709	10.47664882	0.193420951	0.41045034	0.471240812	0.637468778	Gemin7
1756	ENSMUSG00000028681	11.30605851	-0.29486546	0.626120036	-0.470940783	0.637683023	Ptch2
3606	ENSMUSG00000055013	12.31731111	0.18455556	0.39191971	0.47090145	0.637711112	Agap1
1326	ENSMUSG00000025477	9.020373084	-0.276632143	0.58806038	-0.470414524	0.63805889	Inpp5a
4100	ENSMUSG00000072487	14.21112683	-0.230981594	0.491072061	-0.470361914	0.63809647	Mroh5
412	ENSMUSG00000015095	35.71625568	0.150480661	0.320508258	0.469506345	0.638707751	Fbxw5
2432	ENSMUSG00000034274	16.88051804	-0.169902582	0.362126107	-0.469180705	0.638940476	Thoc5
603	ENSMUSG00000020109	10.02697626	0.217303292	0.463155572	0.469179916	0.63894104	Dnajb12
2621	ENSMUSG00000036833	11.06995572	0.224895851	0.47934627	0.469172005	0.638946695	Pnpla7
1885	ENSMUSG00000029394	17.94857424	-0.167479657	0.357016743	-0.469108691	0.638991947	Cdk2ap1
3642	ENSMUSG00000056215	36.02050574	-0.149552092	0.319004499	-0.468808723	0.639206364	Lrguk
3002	ENSMUSG00000040813	15.51082234	-0.194003712	0.413902831	-0.468718013	0.63927121	Tex264
4326	ENSMUSG00000091422	11.85561274	0.183790476	0.392339309	0.468447774	0.639464411	Gm6455
1759	ENSMUSG00000028693	43.56085979	-0.223916477	0.47809844	-0.468348061	0.639535704	Nasp
1424	ENSMUSG00000026383	12.15565435	0.205315895	0.438611051	0.468104701	0.639709718	Epb41l5
3965	ENSMUSG00000067344	9.414468398	0.200313044	0.4282352	0.46776408	0.639953311	Rps25-ps1
2058	ENSMUSG00000030726	29.26367575	0.205839855	0.440432753	0.467358192	0.640243629	Pold3
1102	ENSMUSG00000023932	9.9187752	-0.268109596	0.574289234	-0.466854644	0.640603877	Cdc5l
3194	ENSMUSG00000044556	43.53573823	-0.154231638	0.33046502	-0.466710933	0.640706706	Tex38
944	ENSMUSG00000022257	34.26841009	-0.170120048	0.364596691	-0.466597894	0.640787594	Laptm4b
4314	ENSMUSG00000090733	16.35724306	-0.18023227	0.386278935	-0.46658581	0.640796241	Rps27
1872	ENSMUSG00000029263	15.18998812	0.23601693	0.505890796	0.466537308	0.640830949	Pigg
3677	ENSMUSG00000057173	179.6896948	-0.204766671	0.43895629	-0.466485332	0.640868144	Rfx8
4221	ENSMUSG00000079382	10.57212918	0.215137185	0.461330462	0.466340731	0.640971628	Gm3443
1298	ENSMUSG00000025217	85.15163122	-0.146729507	0.315193391	-0.465522155	0.641557575	Btrc
2112	ENSMUSG00000031446	12.49848069	-0.253897768	0.545416415	-0.465511784	0.641565	Cul4a
436	ENSMUSG00000015846	24.78964276	-0.184460215	0.396519684	-0.465198127	0.64178958	Rxra
1908	ENSMUSG00000029486	20.2122784	0.168490544	0.362481466	0.464825265	0.642056593	Mrpl1
2298	ENSMUSG00000032530	13.69335167	0.185341692	0.398862986	0.464675084	0.642164154	Lyzl4
724	ENSMUSG00000020745	60.18528411	-0.177726643	0.382486517	-0.464661198	0.642174099	Pafah1b1
4369	ENSMUSG00000095384	42.29398085	0.118386183	0.254843873	0.464543965	0.642258068	1700001F09Rik
3196	ENSMUSG00000044573	19.38156126	-0.187674546	0.404883935	-0.463526779	0.642986825	Acp1
2436	ENSMUSG00000034310	20.4728369	0.447889292	0.967055023	0.463147682	0.643258514	Tmem132d
238	ENSMUSG00000005936	9.709048326	-0.231689107	0.501183255	-0.462284213	0.643877519	Kctd20
3359	ENSMUSG00000048170	10.42123139	-0.298072116	0.645101755	-0.462054418	0.644042297	Mcmbp
976	ENSMUSG00000022427	41.49829968	-0.119279017	0.258369315	-0.461660925	0.644324496	Tomm22
2922	ENSMUSG00000039929	18.59995377	0.231871059	0.502668564	0.461280206	0.644597584	Urb1
453	ENSMUSG00000016626	29.84919134	-0.206047073	0.44744216	-0.460499906	0.645157439	Nlrp14
3004	ENSMUSG00000040828	15.35964568	0.245444045	0.533757581	0.459841797	0.64562978	Catsperd
3481	ENSMUSG00000051236	14.70059955	-0.243870197	0.530713265	-0.459514042	0.645865071	Msrb3
137	ENSMUSG00000003299	10.36328065	-0.237190241	0.516415269	-0.459301371	0.646017763	Mrpl4
3068	ENSMUSG00000041679	9.056224143	0.205125566	0.446736365	0.459164693	0.646115903	Fbxl9
4256	ENSMUSG00000082962	51.90317905	0.209843934	0.457111196	0.4590654	0.646187203	Gm10601
1317	ENSMUSG00000025384	18.7145775	-0.147839829	0.322159731	-0.458902262	0.646304354	Faap100
2510	ENSMUSG00000035376	12.48234257	0.221078814	0.482389319	0.458299562	0.646737239	Hacd2
1594	ENSMUSG00000027546	23.89899302	0.245503718	0.536062917	0.457975566	0.646969996	Atp9a
4226	ENSMUSG00000079429	14.75731516	0.287911964	0.62936244	0.457466073	0.647336083	Mroh2a
4581	ENSMUSG00002075501	70.83915065	-0.449437401	0.983292092	-0.457074153	0.647617747	Gm56171
1065	ENSMUSG00000023007	10.06867808	-0.205228761	0.449183147	-0.456893279	0.647747755	Prpf40b
738	ENSMUSG00000020850	92.0246396	-0.242148782	0.530973166	-0.456047118	0.648356096	Prpf8
4199	ENSMUSG00000078578	91.33549117	-0.099410063	0.218187959	-0.455616633	0.64866568	Ube2d3
2435	ENSMUSG00000034300	27.87880805	0.315561624	0.692782498	0.45549884	0.648750402	Fam53c
343	ENSMUSG00000010154	33.4870775	-0.149006822	0.327416879	-0.455098167	0.649038617	Spire2
948	ENSMUSG00000022280	39.00190878	0.248082797	0.546385852	0.454043231	0.649797712	Rnf19a
1818	ENSMUSG00000028995	18.72519001	-0.216653686	0.478061624	-0.453191964	0.650410518	Hycc1
1211	ENSMUSG00000024603	15.86129263	0.192472092	0.424970727	0.452906706	0.650615922	Dctn4
1423	ENSMUSG00000026361	20.13557174	-0.215164985	0.475909176	-0.452113547	0.651187185	Cdc73
1390	ENSMUSG00000026113	21.82842923	0.325158933	0.719675803	0.451813069	0.651403654	Inpp4a
1431	ENSMUSG00000026457	32.72219243	0.268403099	0.594064636	0.451807906	0.651407374	Adipor1
1445	ENSMUSG00000026567	57.66831512	0.385117579	0.852650821	0.451670917	0.651506072	Adcy10
1159	ENSMUSG00000024293	14.23848992	-0.213929641	0.474200051	-0.451137954	0.651890125	Esco1
188	ENSMUSG00000004865	33.62062325	0.238119172	0.527839049	0.451120797	0.651902489	Srpk1
3491	ENSMUSG00000051427	13.67241564	0.263115349	0.583425174	0.45098388	0.652001167	Ccdc157
1758	ENSMUSG00000028692	24.85675272	-0.2047668	0.454444155	-0.450587379	0.652286965	Akr1a1
940	ENSMUSG00000022247	33.21639064	-0.258085067	0.572931982	-0.450463711	0.652376115	Brix1
3081	ENSMUSG00000041852	17.13360653	-0.156987727	0.348865502	-0.449994986	0.652714056	Tcf20
3019	ENSMUSG00000040964	12.15342116	0.195021478	0.433476926	0.449900482	0.6527822	Arhgef10l
2030	ENSMUSG00000030536	23.28148001	-0.155624798	0.34611235	-0.44963665	0.652972457	Iqgap1
1624	ENSMUSG00000027784	23.53552547	0.327189901	0.72802298	0.449422491	0.65312691	Ppm1l
3927	ENSMUSG00000064367	54.79697715	0.193813897	0.43129468	0.449376971	0.653159741	mt-Nd5
530	ENSMUSG00000019132	29.42174083	0.150660568	0.33543897	0.4491445	0.653327421	BC005537
2616	ENSMUSG00000036810	9.759377679	0.216209954	0.48238406	0.448211232	0.654000757	Cnep1r1
1938	ENSMUSG00000029687	11.2479898	0.291755708	0.651899744	0.447546898	0.654480235	Ezh2
445	ENSMUSG00000016319	15.56468729	-0.283497992	0.633894164	-0.447232374	0.654707289	Slc25a5
1823	ENSMUSG00000029014	22.16494237	-0.154643528	0.345856083	-0.447132594	0.654779326	Dnajc2
3940	ENSMUSG00000066324	27.13513367	0.236010405	0.528098118	0.446906354	0.654942676	Bpnt2
3666	ENSMUSG00000056912	24.50385769	0.358275408	0.801699276	0.446895012	0.654950865	1700017N19Rik
4506	ENSMUSG00000111028	17.62479867	-0.181427053	0.406121742	-0.446730708	0.655069507	Gm5922
1337	ENSMUSG00000025571	14.64186423	0.245641305	0.550872449	0.445913216	0.655659935	Tnrc6c
877	ENSMUSG00000021838	18.65157889	0.3196925	0.717172955	0.445767646	0.655765095	Samd4
881	ENSMUSG00000021877	69.82437287	-0.117667491	0.263985787	-0.445734188	0.655789266	Arf4
1692	ENSMUSG00000028389	39.94227857	0.204650105	0.459195042	0.445671418	0.655834614	Zfp37
3544	ENSMUSG00000052906	27.86176136	0.289613956	0.65071278	0.445071874	0.656267814	Ubxn8
3200	ENSMUSG00000044749	18.86429857	-0.321727744	0.72338921	-0.444750543	0.656500039	Abca6
3465	ENSMUSG00000050912	14.5077305	-0.157827359	0.355113777	-0.444441668	0.656723294	Tmem123
1457	ENSMUSG00000026622	48.46722244	-0.155747064	0.351027927	-0.443688526	0.657267792	Nek2
1564	ENSMUSG00000027379	68.18595888	-0.230221202	0.51926434	-0.443360316	0.657505135	Bub1
1008	ENSMUSG00000022607	10.50326729	-0.252593298	0.569929462	-0.443200984	0.657620367	Ptk2
4322	ENSMUSG00000091264	10.97725998	-0.203325542	0.459135832	-0.442843985	0.657878586	Smim13
3248	ENSMUSG00000045794	36.45629671	0.308257691	0.696210644	0.442764978	0.657935737	Lkaaear1
4050	ENSMUSG00000070372	11.60699645	-0.170543069	0.385199928	-0.442739099	0.657954458	Capza1
3672	ENSMUSG00000057110	14.69052028	-0.306097631	0.691666005	-0.442551216	0.658090378	Cntrl
2370	ENSMUSG00000033444	14.80063916	-0.19431189	0.439161918	-0.442460701	0.658155862	Specc1l
1848	ENSMUSG00000029134	14.45669069	0.349039947	0.789050661	0.442354292	0.658232849	Plb1
2522	ENSMUSG00000035560	19.34781207	-0.193438286	0.43731768	-0.442328987	0.658251158	Wdr20rt
226	ENSMUSG00000005779	60.04994923	-0.168405789	0.380780075	-0.442265235	0.658297285	Psmb4
3133	ENSMUSG00000042726	127.1375974	-0.141125219	0.319291599	-0.441994778	0.658492985	Trafd1
557	ENSMUSG00000019818	21.83384601	0.135591278	0.30691293	0.441790701	0.658640668	Cd164
3279	ENSMUSG00000046668	11.14393576	0.173108298	0.391961734	0.441645913	0.658745455	Cxxc5
374	ENSMUSG00000013155	14.60240173	0.195103951	0.441907847	0.441503703	0.658848382	Enkd1
3144	ENSMUSG00000043020	60.89801194	-0.177380107	0.402164352	-0.441063725	0.659166864	Dnai3
2874	ENSMUSG00000039384	11.19982301	0.188143892	0.426593592	0.441037782	0.659185645	Dusp10
680	ENSMUSG00000020521	17.65926942	0.177769415	0.403212287	0.440882932	0.65929775	Rnft1
3713	ENSMUSG00000058318	9.830810841	0.19123303	0.434059107	0.440569098	0.659524978	Phf21a
1336	ENSMUSG00000025544	65.26103476	-0.170140208	0.386359252	-0.440367888	0.659670678	Tm9sf2
239	ENSMUSG00000005947	13.72625709	0.252219305	0.572819619	0.440311918	0.65971121	Itgae
3732	ENSMUSG00000058881	15.20402396	0.236904936	0.538190669	0.440187743	0.659801137	Zfp516
2829	ENSMUSG00000038914	43.10457776	-0.191556673	0.435591643	-0.439762048	0.660109458	Dido1
4063	ENSMUSG00000070738	14.70868386	0.169074451	0.385423912	0.43867141	0.660899646	Dgkd
28	ENSMUSG00000000804	32.05191744	-0.168667996	0.384625246	-0.438525547	0.661005355	Usp32
14	ENSMUSG00000000365	29.53485848	-0.132965127	0.303483019	-0.438130369	0.661291781	Rnf17
2210	ENSMUSG00000031967	17.03645456	0.229578786	0.524225364	0.437939104	0.661430428	Afg3l1
761	ENSMUSG00000020946	33.16623163	0.310012788	0.707944525	0.437905482	0.661454802	Gosr2
2316	ENSMUSG00000032666	17.30776029	0.305949496	0.698670287	0.437902544	0.661456932	1700025G04Rik
1704	ENSMUSG00000028426	44.73766909	0.142982508	0.326569618	0.437831629	0.661508341	Rad23b
1940	ENSMUSG00000029703	43.79483253	-0.149964604	0.34256056	-0.437775451	0.661549068	Lrwd1
4545	ENSMUSG00000117800	12.44091043	0.468587685	1.073009548	0.436704115	0.662325945	1700122C19Rik
725	ENSMUSG00000020766	17.48650813	-0.247088813	0.565983442	-0.436565445	0.662426527	Galk1
3686	ENSMUSG00000057367	23.549531	-0.168617633	0.38636124	-0.436424815	0.662528538	Birc2
4583	ENSMUSG00002076161	101697.1074	0.351570361	0.805575349	0.436421448	0.66253098	Rn7sk
3015	ENSMUSG00000040928	16.34362602	0.239188704	0.548679848	0.435934917	0.662883951	S100pbp
3383	ENSMUSG00000048755	17.60015882	-0.217351825	0.498891426	-0.435669594	0.663076469	Mcat
1345	ENSMUSG00000025651	43.4066166	0.160870863	0.369505251	0.435368273	0.663295136	Uqcrc1
2838	ENSMUSG00000038984	11.87553287	-0.227881878	0.523530125	-0.435279398	0.663359637	Tspyl5
1819	ENSMUSG00000028998	33.27198628	0.145259755	0.333982296	0.434932498	0.663611425	Tomm7
1136	ENSMUSG00000024169	31.07965392	0.115545974	0.266104429	0.434212891	0.664133853	Ift140
2372	ENSMUSG00000033478	34.29948487	-0.18504271	0.426308176	-0.434058553	0.664245922	Fhip2a
1439	ENSMUSG00000026502	17.66148455	0.15253983	0.351474054	0.434000256	0.664288255	Desi2
1374	ENSMUSG00000025981	12.18135998	-0.333752797	0.769570499	-0.433687098	0.664515677	Coq10b
1783	ENSMUSG00000028813	192.243065	-0.184911499	0.426500755	-0.433554916	0.664611679	CK137956
4486	ENSMUSG00000107383	24.5257039	0.379020497	0.87562181	0.432858675	0.665117444	Gm4366
2158	ENSMUSG00000031709	16.94543274	0.14836003	0.342774974	0.432820483	0.665145191	Tbc1d9
1250	ENSMUSG00000024905	56.43666566	-0.119681304	0.27662164	-0.432653441	0.665266559	Tesmin
1258	ENSMUSG00000024966	29.24738661	-0.186171955	0.430416099	-0.432539478	0.665349366	Stip1
3072	ENSMUSG00000041763	21.21499197	0.163074426	0.377124705	0.432415123	0.665439729	Tpp2
1816	ENSMUSG00000028986	26.70647572	-0.193074662	0.446670018	-0.432253462	0.665557207	Klhl7
3835	ENSMUSG00000061859	10.25083503	-0.207903412	0.481181869	-0.432068258	0.665691804	Patj
2711	ENSMUSG00000037737	37.51313125	0.37715951	0.872917351	0.432067835	0.665692112	Actrt3
1335	ENSMUSG00000025532	14.44455143	0.181516213	0.420119396	0.432058637	0.665698796	Crcp
3578	ENSMUSG00000053907	14.72755108	-0.213268878	0.493738422	-0.431947098	0.665779863	Mat2a
370	ENSMUSG00000012819	12.92351046	0.28503695	0.660573592	0.43149916	0.666105464	Cdh23
1616	ENSMUSG00000027708	60.45235996	0.391632936	0.908502308	0.431075334	0.666413595	Dcun1d1
4411	ENSMUSG00000098973	142.7953911	0.454138994	1.053592689	0.431038483	0.666440389	Mir6236
2751	ENSMUSG00000038150	9.831717971	0.275423788	0.639628164	0.430599844	0.666759355	Ormdl3
1232	ENSMUSG00000024773	11.54670954	-0.166005769	0.385620666	-0.430489814	0.666839375	Atg2a
4261	ENSMUSG00000084135	68.71308988	-0.110772257	0.257324039	-0.430477687	0.666848195	Pom121l12
1820	ENSMUSG00000029001	12.98891415	-0.232895797	0.541230418	-0.430308033	0.666971584	Fbxo44
2983	ENSMUSG00000040652	46.55355063	-0.128937837	0.299864257	-0.429987349	0.667204844	Oaz2
3773	ENSMUSG00000060036	16.74530655	-0.267791901	0.623339082	-0.429608713	0.667480298	Rpl3
3972	ENSMUSG00000067818	18.80391203	-0.404431874	0.942149223	-0.4292652	0.667730239	Myl9
1915	ENSMUSG00000029547	21.61705292	-0.308396162	0.71916727	-0.428823968	0.668051335	Ints1
4094	ENSMUSG00000071661	14.93555847	-0.161130241	0.375978411	-0.428562482	0.668241654	Zbtb3
1228	ENSMUSG00000024758	37.81324203	0.154929114	0.361742407	0.42828574	0.6684431	Rtn3
4387	ENSMUSG00000096265	15.84292708	0.188718481	0.440713625	0.428211134	0.668497411	Potefam3e
3386	ENSMUSG00000048875	37.87839385	0.347544702	0.811623473	0.428209279	0.668498761	Pudp
1561	ENSMUSG00000027364	22.55538215	0.356483731	0.832507888	0.428204628	0.668502147	Usp50
1443	ENSMUSG00000026554	103.7430949	-0.165378446	0.386466446	-0.427924463	0.668706116	Dcaf8
1525	ENSMUSG00000027067	12.3194914	0.201518051	0.470956708	0.427890818	0.668730612	Ssrp1
4102	ENSMUSG00000072624	14.43416627	0.317881746	0.743021721	0.427822953	0.668780025	Gm5460
[truncated: 2,586 more rows]
