# Supplementary material for: Histone Variant H2A.B.3 Orchestrates a New Nuclear Pathway for Histone mRNA Decay
Source: Research Square preprint supplement (doi:10.21203/rs.3.rs-8304477/v1), 2025-12-10
Supplement: Supplementary file 3 [file f75acfdfda0504b2acf7c3ba.xlsx]

## Sheet: Antibodies_PLA
Primary Antibodies	Supplier	Application
		IF	PLA	IP	WB
H2A.B.3	sheep polyclonal, home made	1 in 60	1 in 125	5µg/mL	1 in 1000
Phospho UPF1(Ser1127)	07-1016 (Merck)	1 in 100	1 in 800
SLBP	sc-376310 (Santa Cruz)	1 in 20	1 in 400
SLBP	ab221166 (Abcam)				1 in 1000
NPAT	ab307837 (Abcam)	1 in 400	1 in 400
MIWI	2079S (CST)	1 in 400
EXOSC10	ab50558 (Abcam)	1 in 100	1 in 800
UPF1	ab109363 (Abcam)			5µg/mL	1 in 1000
RNA PolII(pS5)	ab5408 (Abcam)				1 in 5000
PLA reagents	host	supplier	catalogue #		notes
Anti-Mouse PLUS Duolink PLA Probe	Mouse	Merck	DUO92002		PLA
Anti-Rabbit PLUS Duolink PLA Probe	Rabbit	Merck	DUO92002		PLA
Duolink In Situ Probemaker MINUS		Merck	DUO92010		Antibody–oligo conjugation
Secondary Antibodies	Supplier	Application
		IF	PLA	IP	WB
Anti-Rabbit AF488	711-545-152 (Jackson ImmunoResearch)	1 in 400
Anti-Sheep Cy3	713-165-147 (Jackson ImmunoResearch)	1 in 400
Anti-Mouse-HRP	1706516 (Bio-rad)				1 in 5000
Anti-Rabbit-HRP	111-035-144 (Jackson ImmunoResearch)				1 in 20,000
Anti-Sheep-HRP	AB324P (Millipore)				1 in 20,000

## Sheet: RNA probes_qPCR primers
Histone RNA probes for in vitro binding assay
Hist-SL	5'-Cy5-GCGCUCCAGGCUGACACCAAAUCCAAAGGCUCUUUUCAGAGCC
Hist-poly(A)	5'-Cy5-GCGCUCCAGGCUGACACCAAAUCCAAAAAAAAAAAAAAAAAAAA
qPCR primers
Target	Primer	Application
H1	GTCCCTGGCTGCGCTCAAG	forward qPCR primer
H1	CTTGTTGAGCTTGAAGGAGCC	reverse qPCR primer
H2A	CGTGCTGGAGTACCTGAC	forward qPCR primer
H2A	CAGCAGCTTGTTGAGCTC	reverse qPCR primer
H2B	CATGTACGTGTACAAGGTGC	forward qPCR primer
H2B	CGTGATGGTCGAGCGCTTG	reverse qPCR primer
H2bc4	CACTGAGGTTCCTGTGTTTGGA	forward qPCR primer
H2bc4	TTCTTGCCGTCCTTCTTCTG	reverse qPCR primer
H2bc11	GCCTGAGCCTGCGAAGTCC	forward qPCR primer
H2bc11	CACCTTGTAGACGTACACC	reverse qPCR primer
H3	GCAGGACTTCAAGACCGAC	forward qPCR primer
H3	CCAGCTGGATGTCCTTGG	reverse qPCR primer
H3c10	GGAAGCTCGGGTGTTACCAT	forward qPCR primer
H3c10	GTAGCGGTGAGGCTTCTTCA	reverse qPCR primer
H4	CAAAGTTCTGCGCGACAAC	forward qPCR primer
H4	AGGAACACCTTCAGCACAC	reverse qPCR primer
H4c4	ACTGGCTAGTGAGCTTCCTT	forward qPCR primer
H4c4	TCGTAGATGAGGCCGGAGAT	reverse qPCR primer
snRNA u1	CAGGGGAGATACCATGATC	forward qPCR primer
snRNA u1	CACTACCACAAATTATGCAG	reverse qPCR primer
snRNA u2	GTAGTATCTGTTCTTATCAG	forward qPCR primer
snRNA u2	CTGGAGGTACTGCAATAC	reverse qPCR primer
snRNA u4	GCAGTGGCAGTATCGTAG	forward qPCR primer
snRNA u4	GAGACTGTCAAAAATTGCC	reverse qPCR primer
snRNA u5	CTGGTTTCTCTTCAGATC	forward qPCR primer
snRNA u5	CCTGGGTAGGCAGGACCTC	reverse qPCR primer

## Sheet: Plasmids_CellLines
Reagent	Supplier	Catalogue No. / ID	Notes
pET15b–H2A.B.3 (codon-optimised)	GenScript	Custom	6×His, thrombin site
BL21 Rosetta pLysS E. coli	Novagen / Millipore	70954	Expression strain
Neuro2a (N2a) cells	ATCC	CCL-131	Mammalian cell line
pEFIRESp–V5–H2A.B.3		Custom	Expression plasmid

## Sheet: Kits_MolBio
Reagent / Kit	Supplier	Catalogue No.	Notes
Lipofectamine 2000	Thermo Fisher Scientific	11668019	N2a transfection
Dynabeads Antibody Coupling Kit	Thermo Fisher Scientific	14311D	IP
Protein A Dynabeads	Thermo Fisher Scientific	10002D	RNA-IP
Protein G Dynabeads	Thermo Fisher Scientific	10004D	RNA-IP
PureLink RNA Mini Kit	Thermo Fisher Scientific	12183018A	Total RNA isolation
Qubit RNA Assay Kit	Thermo Fisher Scientific	Q33224	RNA quantification
TRIzol reagent	Thermo Fisher Scientific	15596026	RNA extraction
TURBO DNA-free Kit	Thermo Fisher Scientific	AM1907	DNase treatment
SuperScript IV RT	Thermo Fisher Scientific	18090050	cDNA synthesis
Power SYBR Green PCR Master Mix	Applied Biosystems	4368577	qPCR
RiboMinus Eukaryote System v2	Thermo Fisher Scientific	A15026	rRNA depletion
AMPure XP SPRI beads	Beckman Coulter	A63882	RNA cleanup
Oligo(dT)25 magnetic beads	NEB	S1419S	Poly(A)+ purification
RNasin Plus RNase inhibitor	Promega	N2611	RNA protection
E. coli Poly(A) Polymerase (EPAP)	NEB	M0276S	Polyadenylation for DRS
Proteinase K	Thermo Fisher Scientific	EO0491	RNA extraction
dNTP mix	Thermo Fisher Scientific	18427013	cDNA synthesis

## Sheet: Protein_Purif
Reagent	Supplier	Catalogue No.	Notes
HisTrap HP 5 mL column	Cytiva	17524801	IMAC
Superdex 200 Increase 10/300 GL	Cytiva	28990944	SEC
Guanidine hydrochloride	Sigma-Aldrich	G4505	Solubilisation
Triton X-100	Sigma-Aldrich	T8787	Pellet washing
Imidazole	Sigma-Aldrich	I5513	Elution
Thrombin CleanCleave Kit	Sigma-Aldrich	T4546	Tag removal
TCEP-HCl	GoldBio	TCEP25	Reducing agent
Ampicillin sodium	GoldBio	A-301-100	Selection antibiotic
Recombinant H2A	Histone Source, UC Boulder		Histone purification/refolding
Recombinant H2B	Histone Source, UC Boulder		Histone purification/refolding

## Sheet: Reagents
Chemical	Supplier	Catalogue No.	Notes
Tris	Sigma-Aldrich	T6066	Buffer component
NaCl	Sigma-Aldrich	S7653	Buffer component / Bacterial cell culture
HEPES	Sigma-Aldrich	H3375	MST / buffers
EDTA	Sigma-Aldrich	E5134	Chelator
MgCl₂	Sigma-Aldrich	M2670	Wash buffers
Sucrose	Sigma-Aldrich	S9378	Hypotonic buffer
Borate / Boric acid	Sigma-Aldrich	B6768	Fixation buffer
Paraformaldehyde (PFA)	Sigma-Aldrich	P6148	Fixation
Tween-20	Sigma-Aldrich	P9416	Wash buffer
Glycine			Western Blotting
LDS	Thermo Fisher Scientific	B0007	Lysis buffer
LiCl	Sigma-Aldrich	L7026	Poly(A) buffers
Sodium deoxycholate	Sigma-Aldrich	D6750	Lysis buffer
SDS	Bio-Rad	161-0302	Lysis buffer
DTT	Sigma-Aldrich	D9779	Reducing agent
AEBSF	Sigma-Aldrich	11429868001	Protease inhibitor
BSA	Sigma-Aldrich	A9418	Blocking, gradients
Collagenase	Sigma-Aldrich	C6885	Tissue dissociation
Protease inhibitor cocktail	Roche	04693132001	Tissues/lysates
α-Amanitin	Sigma-Aldrich	A2263	RNA polII inhibition in N2a cells
2-propanol	Sigma-Aldrich	I9516	RNA extraction
RPMI	Thermo Fisher Scientific	21870076	Mammalian Cell culture
L-Glutamine	Thermo Fisher Scientific	25030081	Mammalian Cell culture
Penicillin-Streptomycin	Thermo Fisher Scientific	15140122	Mammalian Cell culture
FBS (Fetal Bovine Serum)	Sigma-Aldrich	F9423	Mammalian Cell culture
Opti-MEM	Thermo Fisher Scientific	31985070	Transfection
Tryptone	Thermo Fisher Scientific	211699	Bacterial cell culture
Yeast Extract	Sigma-Aldrich	70161	Bacterial cell culture
Bolt 4-12% Bis-Tris Mini Protein Gel	Thermo Fisher Scientific	NW04120BOX	Western Blotting
Immobilon-PSQ PVDF Membrane	Millipore	ISEQ00010	Western Blotting
Chemiluminescent HRP Substrate	Merck	WBKLS0500	Western Blotting

## Sheet: Nanopore
Reagent / Instrument	Supplier	Catalogue No.	Notes
Direct RNA Sequencing Kit	Oxford Nanopore Technologies	SQK-RNA002	DRS library prep
MinION Mk1B	Oxford Nanopore Technologies	MIN-101B	Sequencer
R9.4.1 flow cells	Oxford Nanopore Technologies	FLO-MIN106	Flow cells
Flush buffer and flush tether	Oxford Nanopore Technologies		Flow cell priming

## Sheet: Software
Software	Supplier	Version	Notes
MinKNOW		4.3.25	Run control
Guppy			Basecalling
NanoPlot			Read QC
NanoStat		1.6.0	Read statistics
minimap2		2.26	Spliced/DRS mapping
Subread / featureCounts			Gene-level counts
DESeq2		1.48.2	Differential expression
Master of Pores		4.0	Preprocessing
Nextflow		24.10.4	Workflow
nanoq		0.10.0	QC
MultiQC		1.27.1	Report aggregation
glmmTMB		1.1.12	GLMMs
DHARMa		0.4.7	Residual diagnostics
Seqkit		2.3.0	Motif analysis
LAS X	Leica		Imaging
ImageJ Coloc2			Colocalisation
Origin	OriginLab	6.0	MST fitting

## Sheet: Equipment
Equipment	Supplier	Notes
Sonic Dismembrator	Fisher Scientific	Bacterial lysis
Avanti J-E centrifuge	Beckman Coulter	High-speed centrifugation
JLA-9.1000 rotor	Beckman Coulter	Cell pelleting
JA-25.50 rotor	Beckman Coulter	Lysate clarification
T100 Thermal Cycler	Bio-Rad	RNA annealing
Monolith NT.115 BLUE/RED	NanoTemper Technologies	MST measurements
Leica SP5 confocal microscope	Leica	IF/PLA imaging
Amersham 680 imager	GE Healthcare	Chemiluminescence imaging
XCell II wet transfer module	Thermo Fisher Scientific	Western transfer
Stratalinker 1800	Stratagene	UV crosslinking
MinION Mk1B	Oxford Nanopore Technologies	Nanopore sequencing
Custom BSA gradient chamber	Custom-made	Sedimentation of spermatids
